# Supplementary material for: Organocatalytic asymmetric nitroso aldol reaction of α-substituted malonamates
Source: publisher site journal article supplement (doi:10.3762/bjoc.18.25), 2022-02-21
Supplement: Additional file 1 [file 1860-5397-18-25-S1.pdf]

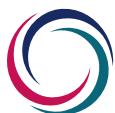

## Supporting Information

for

### **Organocatalytic asymmetric nitroso aldol reaction of $\alpha$ -substituted malonamates**

Ekta Gupta, Narendra Kumar Vaishanv, Sandeep Kumar, Raja Krishnan Purshottam, Ruchir Kant and Kishor Mohanan

*Beilstein J. Org. Chem.* **2022**, 18, 217–224. doi:10.3762/bjoc.18.25

**Detailed experimental procedures, complete characterization data for all compounds, single-crystal X-ray data of 4a, copies of NMR spectra, and HPLC chromatograms**

## Table of contents

|                                                                                     |     |
|-------------------------------------------------------------------------------------|-----|
| 1. General experimental information .....                                           | S2  |
| 2. Characterization data for compounds <b>4a–y</b> and <b>5</b> .....               | S3  |
| 3. X-ray data of compound <b>4a</b> .....                                           | S16 |
| 4. References .....                                                                 | S17 |
| 5. Copies of <sup>1</sup> H and <sup>13</sup> C NMR spectra for all compounds ..... | S18 |
| 6. HPLC Chromatograms of all compounds .....                                        | S44 |

## General experimental information:

Unless otherwise specified, all reactions were carried out under air atmosphere in oven-dried round-bottomed flasks. The reactions were monitored by TLC visualized by UV (254 nm) and/or with iodine. Flash chromatography was performed on 100–200 mesh silica gel using the gradient system ethyl acetate/hexane. NMR data were recorded with a Bruker AV 400 MHz spectrometer in CDCl<sub>3</sub> using as internal standards the residual CHCl<sub>3</sub> signal for <sup>1</sup>H NMR ( $\delta$  = 7.26 ppm) and the deuterated solvent signal for <sup>13</sup>C NMR ( $\delta$  = 77.16 ppm). Coupling constants are given in hertz (Hz) and the standard abbreviations are used to describe the signal multiplicities. Melting points were measured with a Büchi B-540 melting point apparatus and are uncorrected. High resolution mass spectra were obtained using a Q-TOF mass spectrometer. The ee values were determined on a Waters Standard HPLC System using chiral column with hexane and ethanol as eluent, wavelength = 254 nm. All commercially available reagents were used as received.  $\alpha$ -Methylmalonamates **1a–u** were synthesized following a literature procedure.<sup>1</sup>

## Characterization data for compounds 4a–y and 5

### (S)-Methyl 3-((4-bromophenyl)amino)-2-(hydroxy(phenyl)amino)-2-methyl-3-oxopropanoate (4a)

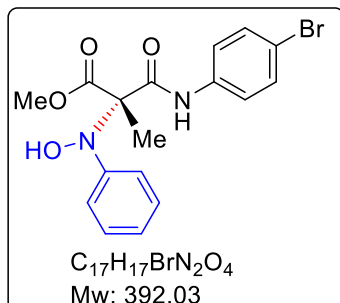

Following the general procedure, treatment of methyl 3-((4-bromophenyl)amino)-2-methyl-3-oxopropanoate (**1a**, 57 mg, 0.20 mmol) with nitrosobenzene (**2a**, 26 mg, 0.24 mmol) in the presence of (*R,R*)-TUC (**3a**, 17 mg, 0.04 mmol) in toluene (3 mL) at 0 °C for 3 h followed by column chromatography afforded the product **4a** as white solid (71 mg, 90%). *R<sub>f</sub>* (EtOAc/hexane 3:7) = 0.20. **Mp** 115–117 °C. <sup>13</sup>C NMR (100 MHz, δ ppm/CDCl<sub>3</sub>): 171.5 (C), 167.0 (C), 147.1 (C), 136.5 (C), 132.1 (CH), 132.1 (CH), 128.9 (CH), 128.9 (CH), 126.1 (CH), 122.2 (CH), 122.2 (CH), 121.6 (CH), 121.6 (CH), 117.4 (C), 76.8 (C), 53.5 (CH<sub>3</sub>), 17.9 (CH<sub>3</sub>). <sup>1</sup>H NMR (400 MHz, δ ppm/CDCl<sub>3</sub>): 9.04 (s, 1H), 7.47–7.44 (m, 5H), 7.31–7.26 (m, 2H), 7.20–7.14 (m, 3H), 3.81 (s, 3H), 1.59 (s, 3H). Enantiomeric excess was determined by HPLC on Chiralpak IC column (Hexane/Ethanol 90:10 V/V, flow rate 1.0 mL/min, 254 nm, τ<sub>minor</sub> = 13.0 min, τ<sub>major</sub> = 13.9 min, 90% ee). **HRMS** for C<sub>17</sub>H<sub>17</sub>BrN<sub>2</sub>NaO<sub>4</sub><sup>+</sup>: calcd. [M+Na]<sup>+</sup>: 415.0264, found: 415.0278, [M+2+Na]<sup>+</sup>: 417.0257.

### (S)-Methyl 2-(hydroxy(phenyl)amino)-2-methyl-3-(*p*-tolylamino)propanoate (4b)

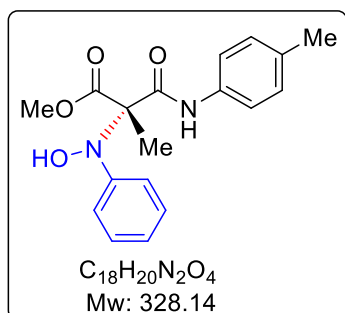

Following the general procedure, treatment of methyl 2-methyl-3-oxo-3-(*p*-tolylamino)propanoate (**1b**, 44 mg, 0.20 mmol) with nitrosobenzene (**2a**, 26 mg, 0.24 mmol) in the presence of (*R,R*)-TUC (**3a**, 17 mg, 0.04 mmol) in toluene (3 mL) at 0 °C for 3 h followed by column chromatography afforded the product **4b** as white solid (62 mg, 95%). *R<sub>f</sub>* (EtOAc/hexane 3:7) = 0.28. **Mp** 149–151 °C. <sup>13</sup>C NMR (100 MHz, δ ppm/CDCl<sub>3</sub>): 171.7 (C), 166.5 (C), 147.3 (C), 134.9 (C), 134.4 (C), 129.6 (CH), 129.6 (CH), 128.8 (CH), 128.8 (CH), 125.7 (CH), 121.9 (CH), 121.9 (CH), 120.0 (CH), 120.0 (CH), 77.2 (C), 53.3 (CH<sub>3</sub>), 20.9 (CH<sub>3</sub>), 17.6 (CH<sub>3</sub>). <sup>1</sup>H NMR (400 MHz, δ ppm/CDCl<sub>3</sub>): 9.00 (s, 1H), 7.48 (d, *J* = 8.4 Hz, 2H), 7.45 (s, 1H), 7.34–7.26 (m, 4H), 7.17 (d, *J* = 8.0, 3H), 3.85 (s, 3H), 2.36 (s, 3H), 1.65 (s, 3H). Enantiomeric excess was determined by HPLC on Chiralpak IC column (Hexane/Ethanol 90:10 V/V, flow rate 1.0 mL/min, 254 nm, τ<sub>minor</sub> = 28.9 min, τ<sub>major</sub> = 32.8 min, 84% ee). **HRMS** for C<sub>18</sub>H<sub>20</sub>N<sub>2</sub>NaO<sub>4</sub><sup>+</sup>: calcd. [M+Na]<sup>+</sup>: 351.1315, found: 351.1323.

**(S)-Methyl 3-((4-chlorophenyl)amino)-2-(hydroxy(phenyl)amino)-2-methyl-3-oxopropanoate (4c)**

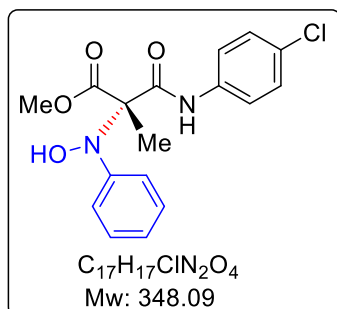

Following the general procedure, treatment of methyl 3-((4-chlorophenyl)amino)-2-methyl-3-oxopropanoate (**1c**, 48 mg, 0.20 mmol) with nitrosobenzene (**2a**, 26 mg, 0.24 mmol) in the presence of (*R,R*)-TUC (**3a**, 17 mg, 0.04 mmol) in toluene (3 mL) at 0 °C for 3 h followed by column chromatography afforded the product **4c** as white solid (66 mg, 95%). *R<sub>f</sub>* (EtOAc/hexane 3:7) = 0.5. *Mp* 134-136 °C. <sup>13</sup>C NMR (100 MHz, δ ppm/CDCl<sub>3</sub>): 171.6 (C), 167.0 (C), 147.1 (C), 136.0 (C), 129.8 (C), 129.2 (CH), 129.2 (CH), 129.0 (CH), 129.0 (CH), 126.1 (CH), 122.2 (CH), 122.2 (CH), 121.3 (CH), 121.3 (CH), 76.8 (C), 53.5 (CH<sub>3</sub>), 18.1 (CH<sub>3</sub>). <sup>1</sup>H NMR (400 MHz, δ ppm/CDCl<sub>3</sub>): 9.03 (s, 1H), 7.51 (d, *J* = 8.8 Hz, 2H), 7.39 (s, 1H), 7.31-7.28 (m, 4H), 7.21-7.15 (m, 3H), 3.82 (s, 3H), 1.60 (s, 3H). Enantiomeric excess was determined by HPLC on Chiralpak IC column (Hexane/Ethanol 90:10 V/V, flow rate 1.0 mL/min, 254 nm, τ<sub>minor</sub> = 6.7 min, τ<sub>major</sub> = 7.2 min, 83% ee). HRMS for C<sub>17</sub>H<sub>18</sub>ClN<sub>2</sub>O<sub>4</sub><sup>+</sup>: calcd. [M+H]<sup>+</sup>: 349.0950, found: 349.0940, [M+2+H]<sup>+</sup>: 351.0910.

**(S)-Methyl 3-((4-fluorophenyl)amino)-2-(hydroxy(phenyl)aminomethyl)-3-oxopropanoate (4d)**

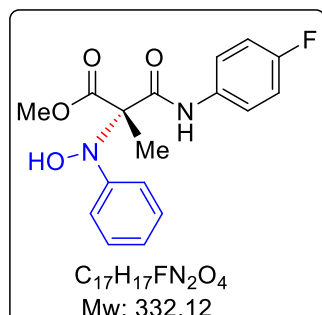

Following the general procedure, treatment of methyl 3-((4-fluorophenyl)amino)-2-methyl-3-oxopropanoate (**1d**, 45 mg, 0.20 mmol) with nitrosobenzene (**2a**, 26 mg, 0.24 mmol) in the presence of (*R,R*)-TUC (**3a**, 17 mg, 0.04 mmol) in toluene (3 mL) at 0 °C for 3 h followed by column chromatography afforded the product **4d** as white solid (61 mg, 92%). *R<sub>f</sub>* (EtOAc/hexane 3:7) = 0.45. *Mp* 116-118 °C. <sup>13</sup>C NMR (100 MHz, δ ppm/CDCl<sub>3</sub>): 171.7 (C), 167.0 (C), 159.7 (d, *J* = 242.7 Hz, C), 147.1 (C), 133.5 (C), 128.9 (CH), 128.9 (CH), 126.0 (CH), 122.1 (CH), 122.1 (CH), 121.9 (d, *J* = 7.8 Hz, CH), 121.9 (d, *J* = 7.8 Hz, CH), 115.8 (d, *J* = 22.4 Hz, CH), 115.8 (d, *J* = 22.4 Hz, CH), 76.7 (C), 53.4 (CH<sub>3</sub>), 18.0 (CH<sub>3</sub>). <sup>1</sup>H NMR (400 MHz, δ ppm/CDCl<sub>3</sub>): 8.98 (s, 1H), 7.55-7.51 (m, 2H), 7.33-7.20 (m, 5H), 7.17 (t, *J* = 7.2 Hz, 1H), 7.04 (t, *J* = 8.8 Hz, 2H), 3.84 (s, 3H), 1.61 (s, 3H). Enantiomeric excess was determined by HPLC on Chiralpak IC column (Hexane/Ethanol 90:10 V/V, flow rate 1.0 mL/min, 254 nm, τ<sub>minor</sub> = 27.4 min, τ<sub>major</sub> = 30.9 min, 79% ee). HRMS for C<sub>17</sub>H<sub>17</sub>FN<sub>2</sub>NaO<sub>4</sub><sup>+</sup>: calcd. [M+Na]<sup>+</sup>: 355.1065, found: 355.1063.

**(S)-Methyl 3-((4-acetylphenyl)amino)-2-(hydroxy(phenyl)amino)-2-methyl-3-oxopropanoate (4e)**

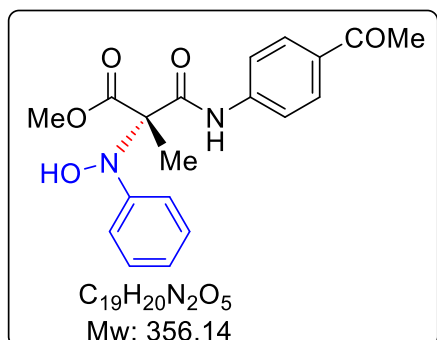

Following the general procedure, treatment of methyl 3-((4-acetylphenyl)amino)-2-methyl-3-oxopropanoate (**1e**, 50 mg, 0.20 mmol) with nitrosobenzene (**2a**, 26 mg, 0.24 mmol) in the presence of (*R,R*)-TUC (**3a**, 17 mg, 0.04 mmol) in toluene (3 mL) at 0 °C for 3 h followed by column chromatography afforded the product **4e** as white white solid (53 mg, 75%).  $R_f$  (EtOAc/hexane 3:7) = 0.39. **Mp** 130-132 °C.  $^{13}C$  NMR (100 MHz,  $\delta$  ppm/ $CDCl_3$ ):

197.4 (C), 171.1 (C), 167.4 (C), 147.1 (C), 141.9 (C), 133.2 (C), 129.9 (CH), 129.9 (CH), 128.9 (CH), 128.9 (CH), 126.2 (CH), 122.4 (CH), 122.4 (CH), 119.3 (CH), 119.3 (CH), 77.1 (C), 53.4 (CH<sub>3</sub>), 26.5 (CH<sub>3</sub>), 17.7 (CH<sub>3</sub>).  $^1H$  NMR (400 MHz,  $\delta$  ppm/ $CDCl_3$ ): 9.27 (s, 1H), 7.88 (d,  $J$  = 8.0 Hz, 2H), 7.62 (d,  $J$  = 8.4 Hz, 3H), 7.28-7.18 (m, 4H), 7.13 (t,  $J$  = 7.0 Hz, 1H), 3.77 (s, 3H), 2.52 (s, 3H), 1.57 (s, 3H). Enantiomeric excess was determined by HPLC on Chiralpak IC column (Hexane/Ethanol 90:10 V/V, flow rate 1.0 mL/min, 254 nm,  $\tau_{minor}$  = 19.0 min,  $\tau_{major}$  = 21.1 min, 75% ee). **HRMS** for  $C_{19}H_{20}N_2NaO_5^+$ : calcd.  $[M+Na]^+$ : 379.1264, found: 379.1288.

**(S)-Methyl 2-(hydroxy(phenyl)amino)-2-methyl-3-((4-nitrophenyl)amino)-3-oxopropanoate (4f)**

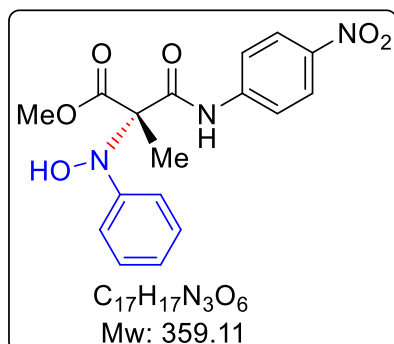

Following the general procedure, treatment of methyl 2-methyl-3-((4-nitrophenyl)amino)-3-oxopropanoate (**1f**, 51 mg, 0.20 mmol) with nitrosobenzene (**2a**, 26 mg, 0.24 mmol) in the presence of (*R,R*)-TUC (**3a**, 17 mg, 0.04 mmol) in toluene (3 mL) at 0 °C for 3 h followed by column chromatography afforded the product **4f** as a yellow solid (68 mg, 95%).  $R_f$  (EtOAc/hexane 3:7) = 0.33. **Mp** 161-163 °C.  $^{13}C$  NMR (100 MHz,  $\delta$  ppm/ $CDCl_3$ ): 170.8 (C),

167.7 (C), 146.7 (C), 144.0 (C), 143.3 (C), 129.1 (CH), 129.1 (CH), 126.6 (CH), 125.3 (CH), 125.3 (CH), 122.5 (CH), 122.5 (CH), 119.6 (CH), 119.6 (CH), 76.8 (C), 53.6 (CH<sub>3</sub>), 18.4 (CH<sub>3</sub>).  $^1H$  NMR (400 MHz,  $\delta$  ppm/ $CDCl_3$ ): 9.39 (s, 1H), 8.23 (d,  $J$  = 9.2 Hz, 2H), 7.77 (d,  $J$  = 8.8 Hz, 2H), 7.35-7.26 (m, 3H), 7.22 (d,  $J$  = 8.4 Hz, 3H), 3.85 (s, 3H), 1.62 (s, 3H). Enantiomeric excess was determined by HPLC on Chiralpak IC column (Hexane/Ethanol 90:10 V/V, flow rate 1.0 mL/min, 254 nm,  $\tau_{minor}$  = 10.3 min,  $\tau_{major}$  = 11.5 min, 85% ee). **HRMS** for  $C_{17}H_{17}N_3NaO_6^+$ : calcd.  $[M+Na]^+$ : 382.1010, found: 382.1002.

**(S)-Methyl 3-((3-bromophenyl)amino)-2-(hydroxy(phenyl)amino)-2-methyl-3-oxopropanoate (4g)**

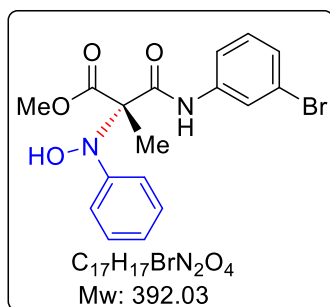

Following the general procedure, treatment of methyl 3-((3-bromophenyl)amino)-2-methyl-3-oxopropanoate (**1g**, 57 mg, 0.20 mmol) with nitrosobenzene (**2a**, 26 mg, 0.24 mmol) in the presence of (*R,R*)-TUC (**3a**, 17 mg, 0.04 mmol) in toluene (3 mL) at 0 °C for 3 h followed by column chromatography afforded the product **4g** as white solid (74 mg, 95%).  $R_f$  (EtOAc/hexane 3:7) = 0.26. **Mp** 145-147 °C.  $^{13}C$  NMR (100 MHz,  $\delta$  ppm/ $CDCl_3$ ): 171.5

(C), 167.1 (C), 147.0 (C), 138.7 (C), 130.5 (CH), 129.0 (CH), 129.0 (CH), 127.8 (CH), 126.1 (CH), 123.0 (CH), 122.8 (C), 122.2 (CH), 122.2 (CH), 118.5 (CH), 76.8 (C), 53.5 (CH<sub>3</sub>), 18.0 (CH<sub>3</sub>).  $^1H$  NMR (400 MHz,  $\delta$  ppm/ $CDCl_3$ ): 9.05 (s, 1H), 7.86 (s, 1H), 7.47 (d,  $J$  = 7.6 Hz, 1H), 7.33-7.28 (m, 3H), 7.22-7.16 (m, 5H), 3.83 (s, 3H), 1.60 (s, 3H). Enantiomeric excess was determined by HPLC on Chiralpak IC column (Hexane/Ethanol 90:10 V/V, flow rate 1.0 mL/min, 254 nm,  $\tau_{minor}$  = 24.8 min,  $\tau_{major}$  = 27.6 min, 63% ee). **HRMS** for  $C_{17}H_{17}BrN_2NaO_4^+$ : calcd.  $[M+Na]^+$ : 415.0264, found: 415.0252,  $[M+2+Na]^+$ : 417.0229.

**(S)-Methyl 2-(hydroxy(phenyl)amino)-3-((3-methoxyphenyl)amino)-2-methyl-3-oxopropanoate (4h)**

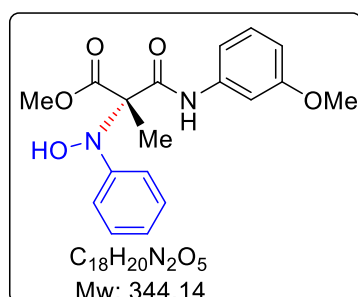

Following the general procedure, treatment of methyl 3-((3-methoxyphenyl)amino)-2-methyl-3-oxopropanoate (**1h**, 47 mg, 0.20 mmol) with nitrosobenzene (**2a**, 26 mg, 0.24 mmol) in the presence of (*R,R*)-TUC (**3a**, 17 mg, 0.04 mmol) in toluene (3 mL) at 0 °C for 3 h followed by column chromatography afforded the product **4h** as a red solid (52 mg, 75%).  $R_f$  (EtOAc/hexane 3:7) = 0.30. **Mp** 135-137

°C.  $^{13}C$  NMR (100 MHz,  $\delta$  ppm/ $CDCl_3$ ): 171.7 (C), 166.8 (C), 160.4 (C), 147.1 (C), 138.7 (C), 129.8 (CH), 128.9 (CH), 126.0 (CH), 122.1 (CH), 122.1 (CH), 112.1 (CH), 111.0 (CH), 111.0 (CH), 105.5 (CH), 77.2 (C), 55.5 (CH<sub>3</sub>), 53.5 (CH<sub>3</sub>), 17.9 (CH<sub>3</sub>).  $^1H$  NMR (400 MHz,  $\delta$  ppm/ $CDCl_3$ ): 9.01 (s, 1H), 7.36-7.16 (m, 8H), 7.03 (d,  $J$  = 7.6 Hz, 1H), 6.70 (d,  $J$  = 7.6 Hz, 1H), 3.83 (s, 3H), 3.80 (s, 3H), 1.61 (s, 3H). Enantiomeric excess was determined by HPLC on Chiralpak IC column (Hexane/Ethanol 90:10 V/V, flow rate 1.0 mL/min, 254 nm,  $\tau_{minor}$  = 35.3 min,  $\tau_{major}$  = 37.5 min, 80% ee). **HRMS** for  $C_{18}H_{20}N_2NaO_5^+$ : calcd.  $[M+Na]^+$ : 367.1264, found: 367.1269.

**(S)-Methyl 2-(hydroxy(phenyl)amino)-2-methyl-3-((3-nitrophenyl)amino)-3-oxopropanoate (4i)**

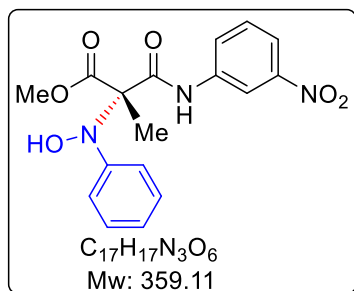

Following the general procedure, treatment of methyl 2-methyl-3-((3-nitrophenyl)amino)-3-oxopropanoate (**1i**, 51 mg, 0.20 mmol) with nitrosobenzene (**2a**, 26 mg, 0.24 mmol) in the presence of (*R,R*)-TUC (**3a**, 17 mg, 0.04 mmol) in toluene (3 mL) at 0 °C for 3 h followed by column chromatography afforded the product **4i** as a yellow solid (68 mg, 95%).  $R_f$  (EtOAc/hexane 3:7) = 0.33. **Mp** 155-157 °C.  $^{13}C$  NMR (100

MHz,  $\delta$  ppm/ $CDCl_3$ ): 171.3 (C), 167.7 (C), 148.8 (C), 146.8 (C), 138.6 (C), 130.0 (CH), 129.0 (CH), 129.0 (CH), 126.4 (CH), 125.7 (CH), 122.5 (CH), 122.5 (CH), 119.3 (CH), 114.9 (CH), 76.8 (C), 53.6 ( $CH_3$ ), 18.4 ( $CH_3$ ).  $^1H$  NMR (400 MHz,  $\delta$  ppm/ $CDCl_3$ ): 9.30 (s, 1H), 8.48 (s, 1H), 7.97 (t,  $J$  = 8.8 Hz, 2H), 7.51 (t,  $J$  = 8.0 Hz, 1H), 7.43 (s, 1H), 7.33-7.17 (m, 5H), 3.84 (s, 3H), 1.62 (s, 3H). Enantiomeric excess was determined by HPLC on Chiralpak IC column (Hexane/Ethanol 90:10 V/V, flow rate 1.0 mL/min, 254 nm,  $\tau_{minor}$  = 19.6 min,  $\tau_{major}$  = 20.3 min, 41% ee). **HRMS** for  $C_{17}H_{17}N_3NaO_6^+$ : calcd.  $[M+Na]^+$ : 382.1010, found: 382.1032.

**(S)-Methyl 3-((2-bromophenyl)amino)-2-(hydroxy(phenyl)amino)-2-methyl-3-oxopropanoate (4j)**

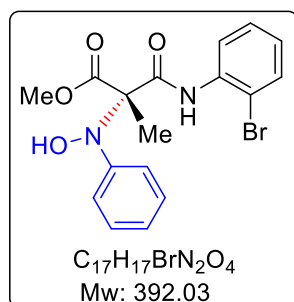

Following the general procedure, treatment of methyl 3-((2-bromophenyl)amino)-2-methyl-3-oxopropanoate (**1j**, 57 mg, 0.20 mmol) with nitrosobenzene (**2a**, 26 mg, 0.24 mmol) in the presence of (*R,R*)-TUC (**3a**, 17 mg, 0.04 mmol) in toluene (3 mL) at 0 °C for 3 h followed by column chromatography afforded the product **4j** as white solid (71 mg, 90%).  $R_f$  (EtOAc/hexane 3:7) = 0.34. **Mp** 125-127 °C.  $^{13}C$  NMR (100 MHz,  $\delta$  ppm/ $CDCl_3$ ): 171.1 (C),

167.1 (C), 147.1 (C), 135.6 (C), 132.5 (CH), 128.9 (CH), 128.9 (CH), 128.5 (CH), 126.3 (CH), 125.6 (CH), 122.8 (CH), 122.8 (CH), 122.0 (CH), 114.0 (C), 76.8 (C), 53.4 ( $CH_3$ ), 18.0 ( $CH_3$ ).  $^1H$  NMR (400 MHz,  $\delta$  ppm/ $CDCl_3$ ): 9.67 (s, 1H), 8.32 (d,  $J$  = 8 Hz, 1H), 7.57 (d,  $J$  = 8 Hz, 1H), 7.33-7.18 (m, 6H), 7.10 (s, 1H), 7.01 (t,  $J$  = 7.2 Hz, 1H), 3.84 (s, 3H), 1.63 (s, 3H). Enantiomeric excess was determined by HPLC on Chiralpak IC column (Hexane/Ethanol 90:10 V/V, flow rate 1.0 mL/min, 254 nm,  $\tau_{minor}$  = 14.0 min,  $\tau_{major}$  = 15.1 min, 54% ee). **HRMS** for  $C_{17}H_{17}BrN_2NaO_4^+$ : calcd.  $[M+Na]^+$ : 415.0264, found: 415.0242,  $[M+2+Na]^+$ : 417.0226.



**(S)-Methyl 3-((2,5-dimethylphenyl)amino)-2-(hydroxy(phenyl)amino)-2-methyl-3-oxopropanoate (1C less) (4k)**

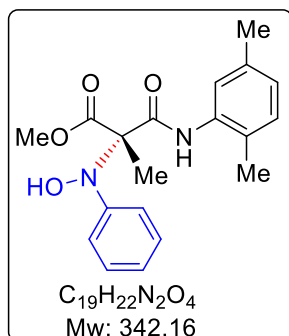

Following the general procedure, treatment of methyl 3-((2,5-dimethylphenyl)amino)-2-methyl-3-oxopropanoate (**1k**, 47 mg, 0.20 mmol) with nitrosobenzene (**2a**, 26 mg, 0.24 mmol) in the presence of (*R,R*)-TUC (**3a**, 17 mg, 0.04 mmol) in toluene (3 mL) at 0 °C for 3 h followed by column chromatography afforded the product **4k** as white solid (65 mg, 95%).  $R_f$  (EtOAc/hexane 3:7) = 0.50. **Mp** 123-125 °C.  $^{13}C$  NMR (100 MHz,  $\delta$  ppm/ $CDCl_3$ ): 171.9 (C), 166.7 (C), 147.3 (C), 136.6 (C), 135.2 (C), 130.3 (CH), 128.8 (CH), 128.8 (CH), 125.9 (CH), 125.6 (CH), 122.7 (CH), 121.8 (CH), 121.8 (CH), 76.6 (C), 53.3 (CH<sub>3</sub>), 21.2 (CH<sub>3</sub>), 17.9 (CH<sub>3</sub>), 17.1 (CH<sub>3</sub>).  $^1H$  NMR (400 MHz,  $\delta$  ppm/ $CDCl_3$ ): 9.01 (s, 1H), 7.77 (s, 1H), 7.51 (s, 1H), 7.32-7.22 (m, 4H), 7.15 (t,  $J$  = 7.2 Hz, 1H), 7.08 (d,  $J$  = 7.6 Hz, 1H), 6.90 (d,  $J$  = 7.6 Hz, 1H), 3.82 (s, 3H), 2.32 (s, 3H), 2.23 (s, 3H), 1.66 (s, 3H). Enantiomeric excess was determined by HPLC on Chiralpak IC column (Hexane/Ethanol 95:5 V/V, flow rate 1.0 mL/min, 254 nm,  $\tau_{minor}$  = 26.6 min,  $\tau_{major}$  = 27.9 min, 85% ee). **HRMS** for  $C_{19}H_{22}N_2NaO_4^+$ : calcd.  $[M+Na]^+$ : 365.1472, found: 365.1445.

**(S)-Methyl 3-((3,4-dimethoxyphenyl)amino)-2-(hydroxy(phenyl)amino)-2-methyl-3-oxopropanoate (4l)**

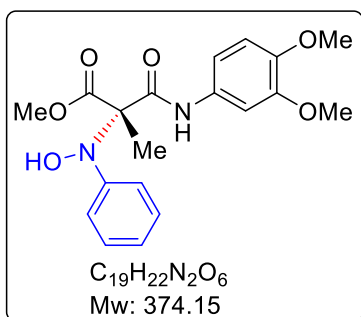

Following the general procedure, treatment of methyl 3-((3,4-dimethoxyphenyl)amino)-2-methyl-3-oxopropanoate (**1l**, 50 mg, 0.20 mmol) with nitrosobenzene (**2a**, 26 mg, 0.24 mmol) in the presence of (*R,R*)-TUC (**3a**, 17 mg, 0.04 mmol) in toluene (3 mL) at 0 °C for 4 h followed by column chromatography afforded the product **4l** as white solid (61 mg, 82%).  $R_f$  (EtOAc/hexane 3:7) = 0.16. **Mp** 143-145 °C.  $^{13}C$  NMR (100 MHz,  $\delta$  ppm/ $CDCl_3$ ): 171.8 (C), 166.6 (C), 149.3 (C), 147.2 (C), 146.2 (C), 131.2 (C), 128.9 (CH), 128.9 (CH), 125.9 (CH), 122.1 (CH), 122.1 (CH), 111.8 (CH), 111.5 (CH), 104.7 (CH), 76.7 (C), 56.3 (CH<sub>3</sub>), 56.1 (CH<sub>3</sub>), 53.4 (CH<sub>3</sub>), 17.9 (CH<sub>3</sub>).  $^1H$  NMR (400 MHz,  $\delta$  ppm/ $CDCl_3$ ): 8.93 (s, 1H), 7.40-7.28 (m, 4H), 7.23-7.21 (m, 2H), 7.15 (t,  $J$  = 7.2 Hz, 1H), 6.94 (dd,  $J$  = 8.8 Hz, 2.4 Hz, 1H), 6.82 (d,  $J$  = 8.8 Hz, 1H), 3.88 (s, 3H), 3.86 (s, 3H), 3.83 (s, 3H), 1.61 (s, 3H). Enantiomeric excess was determined by HPLC on Chiralpak IC column (Hexane/Ethanol 90:10 V/V, flow rate 1.0 mL/min, 254 nm,  $\tau_{minor}$  = 16.3 min,  $\tau_{major}$  = 17.5 min, 91% ee). **HRMS** for  $C_{19}H_{23}N_2O_6^+$ : calcd.  $[M+H]^+$ : 375.1551, found: 375.1554.

**(S)-Methyl 2-(hydroxy(phenyl)amino)-2-methyl-3-((4-methylthiazol-2-yl)amino)-3-oxopropanoate (4m)**

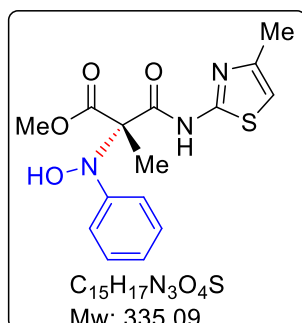

Following the general procedure, treatment of methyl 2-methyl-3-((4-methylthiazol-2-yl)amino)-3-oxopropanoate (**1m**, 45 mg, 0.20 mmol) with nitrosobenzene (**2a**, 26 mg, 0.24 mmol) in the presence of (*R,R*)-TUC (**3a**, 17 mg, 0.04 mmol) in toluene (3 mL) at 0 °C for 3 h followed by column chromatography afforded the product **4m** as white solid (44 mg, 66%).  $R_f$  (EtOAc/hexane 3:7) = 0.50. **Mp** 133-135 °C.  $^{13}C$  NMR (100 MHz,  $\delta$  ppm/ $CDCl_3$ ): 170.2 (C), 167.2 (C), 157.3 (C), 147.4 (C), 147.4 (C), 128.8 (CH), 128.8 (CH), 126.3 (CH), 122.9 (CH), 122.9 (CH), 108.7 (CH), 76.8 (C), 53.4 (CH<sub>3</sub>), 17.5 (CH<sub>3</sub>), 17.0 (CH<sub>3</sub>).  $^1H$  NMR (400 MHz,  $\delta$  ppm/ $CDCl_3$ ): 7.26-7.20 (m, 3H), 7.16-7.15 (m, 2H), 7.10 (t,  $J$  = 5.8 Hz, 1H), 6.50 (s, 1H), 3.70 (s, 3H), 2.30 (s, 3H), 1.57 (s, 3H). Enantiomeric excess was determined by HPLC on Chiralpak IC column (Hexane/Ethanol 90:10 V/V, flow rate 1.0 mL/min, 254 nm,  $\tau_{minor}$  = 9.1 min,  $\tau_{major}$  = 9.8 min, 62% ee). **HRMS** for  $C_{15}H_{18}N_3O_4S^+$ : calcd.  $[M+H]^+$ : 336.1013, found: 336.1010.

**(S)-Methyl 3-(tert-butylamino)-2-(hydroxy(phenyl)amino)-2-methyl-3-oxopropanoate (4n)**

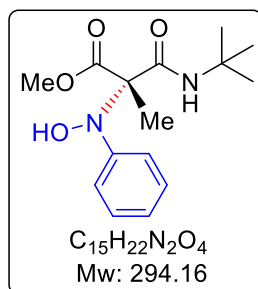

Following the general procedure, treatment of methyl 3-(*tert*-butylamino)-2-methyl-3-oxopropanoate (**1n**, 34 mg, 0.20 mmol) with nitrosobenzene (**2a**, 26 mg, 0.24 mmol) in the presence of (*R,R*)-TUC (**3a**, 17 mg, 0.04 mmol) in toluene (3 mL) at 0 °C for 3 h followed by column chromatography afforded the product **4n** as white solid (50 mg, 85%).  $R_f$  (EtOAc/hexane 3:7) = 0.50. **Mp** 144-146 °C.  $^{13}C$  NMR (100 MHz,  $\delta$  ppm/ $CDCl_3$ ): 172.4 (C), 167.9 (C), 147.5 (C), 128.6 (CH), 128.6 (CH), 125.0 (CH), 121.3 (CH), 121.3 (CH), 76.1 (C), 53.1 (CH<sub>3</sub>), 51.5 (C), 28.5 (CH<sub>3</sub>), 28.5 (CH<sub>3</sub>), 28.5 (CH<sub>3</sub>), 18.2 (CH<sub>3</sub>).  $^1H$  NMR (400 MHz,  $\delta$  ppm/ $CDCl_3$ ): 7.42 (s, 1H), 7.30-7.26 (m, 2H), 7.18-7.16 (m, 2H), 7.11 (t,  $J$  = 7.2 Hz, 1H), 6.98 (s, 1H), 3.80 (s, 3H), 1.56 (s, 3H), 1.36 (s, 9H). Enantiomeric excess was determined by HPLC on Chiralpak IC column (Hexane/Ethanol 90:10 V/V, flow rate 1.0 mL/min, 254 nm,  $\tau_{minor}$  = 13.6 min,  $\tau_{major}$  = 14.5 min, 71% ee). **HRMS** for  $C_{15}H_{23}N_2O_4^+$ : calcd.  $[M+H]^+$ : 295.1652, found: 295.1653.

**(S)-Ethyl 3-((4-bromophenyl)amino)-2-(hydroxy(phenyl)amino)-2-methyl-3-oxopropanoate (4o)**

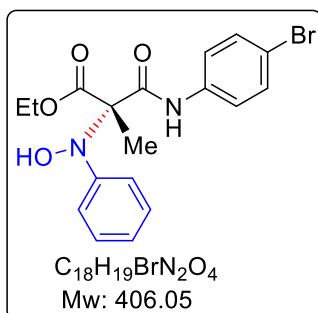

Following the general procedure, treatment of ethyl 3-((4-bromophenyl)amino)-2-methyl-3-oxopropanoate (**1o**, 60 mg, 0.20 mmol) with nitrosobenzene (**2a**, 26 mg, 0.24 mmol) in the presence of (*R,R*)-TUC (**3a**, 17 mg, 0.04 mmol) in toluene (3 mL) at 0 °C for 3 h followed by column chromatography afforded the product **4o** as white solid (54 mg, 66%). *R<sub>f</sub>* (EtOAc/hexane 3:7) = 0.22. **Mp** 122-124 °C. <sup>13</sup>C NMR (100 MHz, δ ppm/CDCl<sub>3</sub>): 171.0 (C), 167.0 (C), 147.2 (C), 136.5 (C), 132.1 (CH), 132.1 (CH), 128.8 (CH), 128.8 (CH), 126.0 (CH), 122.1 (CH), 122.1 (CH), 121.6 (CH), 121.6 (CH), 117.3 (C), 76.8 (C), 62.8 (CH<sub>2</sub>), 17.6 (CH<sub>3</sub>), 14.0 (CH<sub>3</sub>). <sup>1</sup>H NMR (400 MHz, δ ppm/CDCl<sub>3</sub>): 9.02 (s, 1H), 7.50-7.44 (m, 4H), 7.32-7.26 (m, 2H), 7.22-7.16 (m, 3H), 4.31 (q, *J* = 7.2 Hz, 2H), 1.60 (s, 3H), 1.29 (t, *J* = 7.2 Hz, 3H). Enantiomeric excess was determined by HPLC on Chiralpak IC column (Hexane/Ethanol 95:5 V/V, flow rate 1.0 mL/min, 254 nm, τ<sub>minor</sub> = 10.6 min, τ<sub>major</sub> = 13.2 min, 76% ee). **HRMS** for C<sub>18</sub>H<sub>19</sub>BrN<sub>2</sub>NaO<sub>4</sub><sup>+</sup>: calcd. [M+Na]<sup>+</sup>: 429.0420, found: 429.0476, [M+2+Na]<sup>+</sup>: 431.0422.

**(S)-Ethyl 3-((3,4-dimethoxyphenyl)amino)-2-(hydroxy(phenyl)amino)-2-methyl-3-oxopropanoate (4p)**

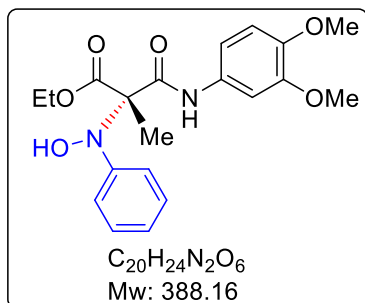

Following the general procedure, treatment of ethyl 3-((3,4-dimethoxyphenyl)amino)-2-methyl-3-oxopropanoate (**1p**, 56 mg, 0.20 mmol) with nitrosobenzene (**2a**, 26 mg, 0.24 mmol) in the presence of (*R,R*)-TUC (**3a**, 17 mg, 0.04 mmol) in toluene (3 mL) at 0 °C for 3 h followed by column chromatography afforded the product **4p** as white solid (51 mg, 66%). *R<sub>f</sub>* (EtOAc/hexane 3:7) = 0.22. **Mp** 132-134 °C. <sup>13</sup>C NMR (100 MHz, δ ppm/CDCl<sub>3</sub>): 171.3 (C), 166.7 (C), 149.2 (C), 147.3 (C), 146.2 (C), 131.2 (C), 128.8 (CH), 128.8 (CH), 125.8 (CH), 122.0 (CH), 122.0 (CH), 111.8 (CH), 111.5 (CH), 104.7 (CH), 76.6 (C), 62.8 (CH<sub>2</sub>), 56.2 (CH<sub>3</sub>), 56.0 (CH<sub>3</sub>), 17.7 (CH<sub>3</sub>), 14.0 (CH<sub>3</sub>). <sup>1</sup>H NMR (400 MHz, δ ppm/CDCl<sub>3</sub>): 8.91 (s, 1H), 7.39 (d, *J* = 2.0 Hz, 1H), 7.34-7.29 (m, 3H), 7.24-7.22 (m, 2H), 7.16 (t, *J* = 5.8 Hz, 1H), 6.96 (dd, *J* = 6.8, 2.0 Hz, 1H), 6.83 (d, *J* = 6.8 Hz, 1H), 4.32-4.30 (m, 2H), 3.90 (s, 3H), 3.87 (s, 3H), 1.62 (s, 3H), 1.30 (t, *J* = 5.8 Hz, 3H). Enantiomeric excess was determined by HPLC on Chiralpak IC column (Hexane/Ethanol 90:10 V/V, flow rate 1.0 mL/min, 254 nm, τ<sub>minor</sub> = 36.3 min, τ<sub>major</sub> = 40.1 min, 80% ee). **HRMS** for C<sub>20</sub>H<sub>24</sub>N<sub>2</sub>NaO<sub>6</sub><sup>+</sup>: calcd. [M+Na]<sup>+</sup>: 411.1527, found: 411.1540.

**(S)-Ethyl 2-(hydroxy(phenyl)amino)-2-methyl-3-((4-nitrophenyl)amino)-3-oxopropanoate (4q)**

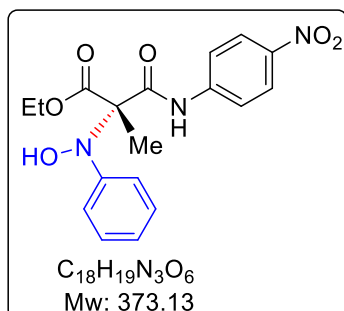

Following the general procedure, treatment of ethyl 2-methyl-3-((4-nitrophenyl)amino)-3-oxopropanoate (**1q**, 53 mg, 0.20 mmol) with nitrosobenzene (**2a**, 26 mg, 0.24 mmol) in the presence of (*R,R*)-TUC (**3a**, 17 mg, 0.04 mmol) in toluene (3 mL) at 0 °C for 3 h followed by column chromatography afforded the product **4q** as white solid (52 mg, 70%).  $R_f$  (EtOAc/hexane 3:7) = 0.22. **Mp** 115-117 °C.  $^{13}C$  NMR (100 MHz,  $\delta$  ppm/ $CDCl_3$ ): 170.7 (C), 167.8 (C), 146.9 (C), 143.9 (C), 143.3 (C), 129.0 (CH), 129.0 (CH), 126.4 (CH), 125.2 (CH), 125.2 (CH), 122.5 (CH), 122.5 (CH), 119.5 (CH), 119.5 (CH), 76.8 (C), 63.0 (CH<sub>2</sub>), 18.0 (CH<sub>3</sub>), 14.0 (CH<sub>3</sub>).  $^1H$  NMR (400 MHz,  $\delta$  ppm/ $CDCl_3$ ): 9.42 (s, 1H), 8.20 (d,  $J$  = 8.8 Hz, 2H), 7.74 (d,  $J$  = 8.8 Hz, 2H), 7.60 (s, 1H), 7.32-7.26 (m, 2H), 7.22-7.16 (m, 3H), 4.29 (q,  $J$  = 7.0 Hz, 2H), 1.60 (s, 3H), 1.28 (t,  $J$  = 7.2 Hz, 3H). Enantiomeric excess was determined by HPLC on Chiralpak IC column (Hexane/Ethanol 90:10 V/V, flow rate 1.0 mL/min, 254 nm,  $\tau_{minor}$  = 12.8 min,  $\tau_{major}$  = 24.8 min, 67% ee). **HRMS** for  $C_{18}H_{19}N_3NaO_6^+$ : calcd.  $[M+Na]^+$ : 396.1166, found: 396.1168.

**(S)-tert-Butyl 3-((3,4-dimethoxyphenyl)amino)-2-(hydroxy(phenyl)amino)-2-methyl-3-oxopropanoate (4r)**

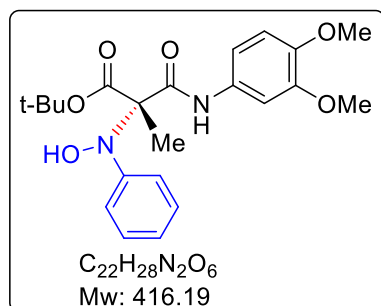

Following the general procedure, treatment of *t*-butyl 3-((3,4-dimethoxyphenyl)amino)-2-methyl-3-oxopropanoate (**1r**, 62 mg, 0.20 mmol) with nitrosobenzene (**2a**, 26 mg, 0.24 mmol) in the presence of (*R,R*)-TUC (**3a**, 17 mg, 0.04 mmol) in toluene (3 mL) at 0 °C for 6 h followed by column chromatography afforded the product **4r** as a red solid (42 mg, 50%).  $R_f$  (EtOAc/hexane 3:7) = 0.28. **Mp** 96-98 °C.  $^{13}C$  NMR (100 MHz,  $\delta$  ppm/ $CDCl_3$ ): 170.6 (C), 167.2 (C), 149.3 (C), 147.5 (C), 146.2 (C), 131.3 (C), 128.8 (CH), 128.8 (CH), 125.7 (CH), 122.2 (CH), 122.2 (CH), 112.0 (CH), 111.6 (CH), 104.9 (CH), 84.5 (C), 77.2 (C), 56.3 (CH<sub>3</sub>), 56.1 (CH<sub>3</sub>), 28.0 (CH<sub>3</sub>), 28.0 (CH<sub>3</sub>), 28.0 (CH<sub>3</sub>), 18.3 (CH<sub>3</sub>).  $^1H$  NMR (400 MHz,  $\delta$  ppm/ $CDCl_3$ ): 8.90 (s, 1H), 7.54 (s, 1H), 7.36-7.26 (m, 5H), 7.15 (t,  $J$  = 7.2 Hz, 1H), 6.96 (dd,  $J$  = 8.4, 2.4 Hz, 1H), 6.82 (d,  $J$  = 8.4 Hz, 1H), 3.89 (s, 3H), 3.86 (s, 3H), 1.56 (s, 3H), 1.50 (s, 9H). Enantiomeric excess was determined by HPLC on Chiralpak IC column (Hexane/Ethanol 90:10 V/V, flow rate 1.0 mL/min, 254 nm,  $\tau_{minor}$  = 24.0 min,  $\tau_{major}$  = 24.9 min, 84% ee). **HRMS** for  $C_{22}H_{29}N_2O_6$ : calcd.  $[M+H]^+$ : 417.2020, found: 417.2018.

**(S)-tert-Butyl 2-(hydroxy(phenyl)amino)-2-methyl-3-((4-nitrophenyl)amino)-3-oxopropanoate (4s)**

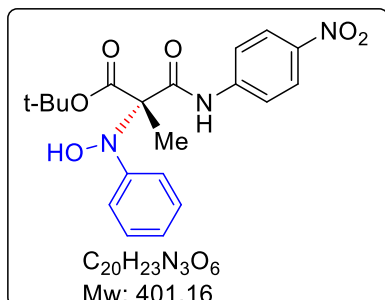

Following the general procedure, treatment of *tert*-butyl 2-methyl-3-((4-nitrophenyl)amino)-3-oxopropanoate (**1s**, 59 mg, 0.20 mmol) with nitrosobenzene (**2a**, 26 mg, 0.24 mmol) in the presence of (*R,R*)-TUC (**3a**, 17 mg, 0.04 mmol) in toluene (3 mL) at 0 °C for 3 h followed by column chromatography afforded the product **4s** as a yellow solid (48 mg, 60%).  $R_f$  (EtOAc/hexane 3:7) = 0.23. **Mp** 115-

117 °C.  $^{13}C$  NMR (100 MHz,  $\delta$  ppm/ $CDCl_3$ ): 170.0 (C), 168.3 (C), 146.9 (C), 143.9 (C), 143.4 (C), 128.9 (CH), 128.9 (CH), 126.4 (CH), 125.2 (CH), 125.2 (CH), 122.6 (CH), 122.6 (CH), 119.5 (CH), 119.5 (CH), 85.0 (C), 77.2 (C), 28.0 ( $CH_3$ ), 28.0 ( $CH_3$ ), 28.0 ( $CH_3$ ), 18.8 ( $CH_3$ ).  $^1H$  NMR (400 MHz,  $\delta$  ppm/ $CDCl_3$ ): 9.36 (s, 1H), 8.24 (d,  $J$  = 8.8 Hz, 2H), 7.76 (d,  $J$  = 9.2 Hz, 2H), 7.73 (s, 1H), 7.32 (t,  $J$  = 7.8 Hz, 2H), 7.25-7.18 (m, 3H), 1.56 (s, 3H), 1.50 (s, 9H). Enantiomeric excess was determined by HPLC on Chiralpak IC column (Hexane/Ethanol 95:5 V/V, flow rate 1.0 mL/min, 254 nm,  $\tau_{minor}$  = 11.3 min,  $\tau_{major}$  = 12.5 min, 82% ee). **HRMS** for  $C_{20}H_{23}N_3NaO_6$ : calcd.  $[M+Na]^+$ : 424.1479, found: 424.1486.

**(S)-4-Methoxybenzyl 3-((4-bromophenyl)amino)-2-(hydroxy(phenyl)amino)-2-methyl-3-oxopropanoate (4t)**

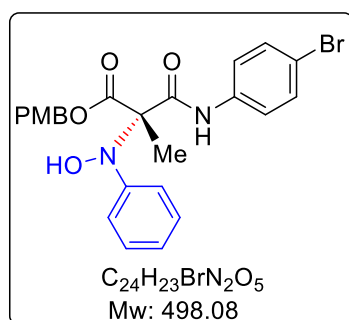

Following the general procedure, treatment of 4-methoxybenzyl 3-((4-bromophenyl)amino)-2-methyl-3-oxopropanoate (**1t**, 78 mg, 0.20 mmol) with nitrosobenzene (**2a**, 26 mg, 0.24 mmol) in the presence (*R,R*)-TUC (**3a**, 17 mg, 0.04 mmol) in toluene (3 mL) at 0 °C for 3 h followed by column chromatography afforded the product **4t** as white solid (75 mg, 75%).  $R_f$  (EtOAc/hexane 3:7) = 0.22. **Mp** 145-147

°C.  $^{13}C$  NMR (100 MHz,  $\delta$  ppm/ $CDCl_3$ ): 170.6 (C), 166.7 (C), 160.0 (C), 147.1 (C), 136.5 (C), 132.1 (CH), 132.1 (CH), 130.3 (CH), 130.3 (CH), 128.9 (CH), 128.9 (CH), 126.8 (C), 125.9 (CH), 122.0 (CH), 122.0 (CH), 121.6 (CH), 121.6 (CH), 117.3 (C), 114.1 (CH), 114.1 (CH), 77.0 (C), 68.2 ( $CH_2$ ), 55.4 ( $CH_3$ ), 17.4 ( $CH_3$ ).  $^1H$  NMR (400 MHz,  $\delta$  ppm/ $CDCl_3$ ): 8.94 (s, 1H), 7.44-7.37 (m, 4H), 7.26-7.22 (m, 5H), 7.14-7.13 (m, 3H), 6.82 (d,  $J$  = 8.4 Hz, 2H), 5.23-5.16 (m, 2H), 3.79 (s, 3H), 1.58 (s, 3H). Enantiomeric excess was determined by HPLC on Chiralpak IC column (Hexane/Ethanol 95:5 V/V, flow rate 1.0 mL/min, 254 nm,  $\tau_{minor}$  = 7.5 min,  $\tau_{major}$  = 8.2 min, 82% ee). **HRMS** for  $C_{24}H_{23}BrN_2NaO_5^+$ : calcd.  $[M+Na]^+$ : 521.0683, found: 521.0705,  $[M+2+Na]^+$ : 415.0264.

**(S)-4-Methoxybenzyl 2-(hydroxy(phenyl)amino)-3-((4-methoxyphenyl)amino)-2-methyl-3-oxopropanoate (4u)**

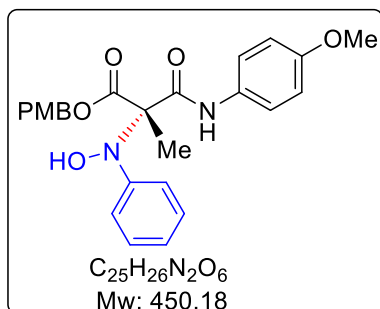

Following the general procedure, treatment of 4-methoxybenzyl 3-((4-methoxyphenyl)amino)-2-methyl-3-oxopropanoate (**1u**, 69 mg, 0.20 mmol) with nitrosobenzene (**2a**, 26 mg, 0.24 mmol) in the presence of (*R,R*)-TUC (**3a**, 17 mg, 0.04 mmol) in toluene (3 mL) at 0 °C for 3 h followed by column chromatography afforded the product **4u** as white solid (63 mg, 70%).  $R_f$  (EtOAc/hexane 3:7) = 0.22. **Mp**

155-157 °C.  $^{13}C$  NMR (100 MHz,  $\delta$  ppm/ $CDCl_3$ ): 170.7 (C), 166.3 (C), 159.9 (C), 156.6 (C), 147.3 (C), 130.5 (C), 130.2 (CH), 130.2 (CH), 128.7 (CH), 128.7 (CH), 126.9 (C), 125.5 (CH), 121.7 (CH), 121.7 (CH), 121.7 (CH), 121.7 (CH), 114.2 (CH), 114.2 (CH), 114.0 (CH), 114.0 (CH), 76.8 (C), 68.0 ( $CH_2$ ), 55.5 ( $CH_3$ ), 55.3 ( $CH_3$ ), 17.2 ( $CH_3$ ).  $^1H$  NMR (400 MHz,  $\delta$  ppm/ $CDCl_3$ ): 8.85 (s, 1H), 7.47-7.42 (m, 2H), 7.26-7.14 (m, 8H), 6.89-6.85 (m, 4H), 5.27-5.20 (m, 2H), 3.82 (s, 6H), 1.63 (s, 3H). Enantiomeric excess was determined by HPLC on Chiralpak IC column (Hexane/Ethanol 90:10 V/V, flow rate 1.0 mL/min, 254 nm,  $\tau_{minor}$  = 15.6 min,  $\tau_{major}$  = 16.9 min, 81% ee). **HRMS** for  $C_{25}H_{27}N_2O_6^+$ : calcd.  $[M+H]^+$ : 451.1864, found: 451.1855.

**(S)-3-Methoxybenzyl 3-((4-bromophenyl)amino)-2-(hydroxy(phenyl)amino)-2-methyl-3-oxopropanoate (4v)**

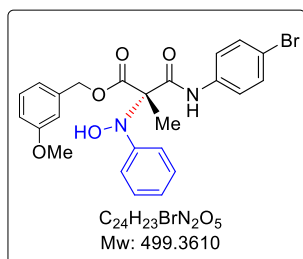

Following the general procedure, treatment of 3-methoxybenzyl 3-((4-bromophenyl)amino)-2-methyl-3-oxopropanoate (**1v**, 78 mg, 0.20 mmol) with nitrosobenzene (**2a**, 26 mg, 0.24 mmol) in the presence of (*R,R*)-TUC (**3a**, 17 mg, 0.04 mmol) in toluene (3 mL) at 0 °C for 3 h followed by column chromatography afforded the product **4v** as white solid (77 mg, 77%).  $R_f$  (EtOAc/hexane 3:7) = 0.22. **Mp** 135-137 °C.  $^{13}C$  NMR (100 MHz,  $\delta$

ppm/ $CDCl_3$ ): 170.6 (C), 166.8 (C), 159.9 (C), 147.1 (C), 136.5 (C), 136.3 (C), 132.1 (CH), 132.1 (CH), 129.9 (CH), 128.9 (CH), 128.9 (CH), 126.0 (CH), 122.1 (CH), 122.1 (CH), 121.7 (CH), 121.7 (CH), 120.4 (CH), 117.4 (C), 114.3 (CH), 113.6 (CH), 77.0 (C), 68.1 ( $CH_2$ ), 55.3 ( $CH_3$ ), 17.5 ( $CH_3$ ).  $^1H$  NMR (400 MHz,  $\delta$  ppm/ $CDCl_3$ ): 9.00 (s, 1H), 7.44-7.39 (m, 4H), 7.30 (s, 1H), 7.25-7.22 (m, 3H), 7.16-7.13 (m, 3H), 6.87-6.82 (m, 3H), 5.20 (d,  $J$  = 2.4 Hz, 2H), 3.73 (s, 3H), 1.61 (s, 3H). Enantiomeric excess was determined by HPLC on Chiralpak IA column (Hexane/Ethanol 90:10 V/V, flow rate 1.0 mL/min, 235 nm), minor enantiomer  $t_r$  = 15.9 min, major enantiomer  $t_r$  = 13.8 min, 83% ee. **HRMS** for  $C_{24}H_{24}BrN_2O_5^+$ : calcd.  $[M+H]^+$ : 499.0863, found: 499.0873,  $[M+2+H]^+$ : 501.0848.

**(S)-3,4,5-Trimethoxybenzyl 3-((4-bromophenyl)amino)-2-(hydroxy(phenyl)amino)-2-methyl-3-oxopropanoate (4w)**

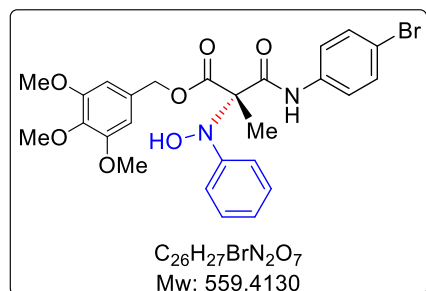

Following the general procedure, treatment of 3,4,5-trimethoxybenzyl 3-((4-bromophenyl)amino)-2-methyl-3-oxopropanoate (**1w**, 90.0 mg, 0.20 mmol) with nitrosobenzene (**2a**, 26 mg, 0.24 mmol) in the presence of (*R,R*)-TUC (**3a**, 17 mg, 0.04 mmol) in toluene (3 mL) at 0 °C for 3 h followed by column chromatography afforded the product **4w** as white solid (73 mg, 65%).  $R_f$  (EtOAc/hexane 3:7) = 0.10. **Mp** 140-142 °C.  $^{13}C$  NMR

(100 MHz,  $\delta$  ppm/ $CDCl_3$ ): 170.4 (C), 166.9 (C), 153.3 (C), 153.3 (C), 153.3 (C), 147.1 (C), 138.1 (C), 136.5 (C), 132.1 (CH), 132.1 (CH), 132.1 (CH), 130.4 (C), 128.8 (CH), 125.9 (CH), 122.1 (CH), 121.5 (CH), 121.5 (CH), 117.3 (CH), 105.2 (CH), 105.2 (CH), 77.2 (C), 68.2 ( $CH_2$ ), 60.9 ( $CH_3$ ), 56.1 ( $CH_3$ ), 56.1 ( $CH_3$ ), 17.7 ( $CH_3$ ).  $^1H$  NMR (400 MHz,  $\delta$  ppm/ $CDCl_3$ ): 9.05 (s, 1H), 7.42 (s, 4H), 7.24-7.20 (m, 2H), 7.16-7.14 (m, 3H), 6.49 (s, 2H), 5.17 (s, 2H), 3.81 (s, 3H), 3.75 (s, 6H), 1.62 (s, 3H). Enantiomeric excess was determined by HPLC on Chiralpak IA column (Hexane/Ethanol 90:10 V/V, flow rate 1.0 mL/min, 235 nm), minor enantiomer  $t_r$  = 19.4 min, major enantiomer  $t_r$  = 16.8 min, 39% ee. **HRMS** for  $C_{26}H_{28}BrN_2O_7^+$ : calcd.  $[M+Na]^+$ : 581.0894, found: 581.0901,  $[M+2+Na]^+$ : 583.0881.

**(S)-Methyl 3-((4-bromophenyl)amino)-2-(hydroxy(*o*-tolyl)amino)-2-methyl-3-oxopropanoate (4x)**

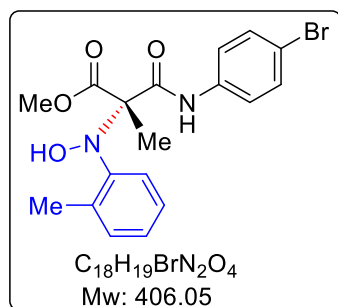

Following the general procedure, treatment of methyl 3-((4-bromophenyl)amino)-2-methyl-3-oxopropanoate (**1a**, 57 mg, 0.20 mmol) with 2-methylnitrosobenzene (**2b**, 29 mg, 0.24 mmol) in the presence of (*R,R*)-TUC (**3a**, 17 mg, 0.04 mmol) in toluene (3 mL) at 0 °C for 3 h followed by column chromatography afforded the product **4x** as white solid (25 mg, 31%).  $R_f$  (EtOAc/hexane 3:7) = 0.50. **Mp** 145-147 °C.  $^{13}C$  NMR

(100 MHz,  $\delta$  ppm/ $CDCl_3$ ): 173.2 (C), 168.7 (C), 144.2 (C), 136.7 (C), 132.2 (CH), 132.2 (CH), 131.6 (C), 128.1 (CH), 127.0 (CH), 123.0 (CH), 123.0 (C), 121.7 (CH), 121.7 (CH), 117.3 (CH), 74.7 (C), 53.4 ( $CH_3$ ), 20.9 ( $CH_3$ ), 18.8 ( $CH_3$ ).  $^1H$  NMR (400 MHz,  $\delta$  ppm/ $CDCl_3$ ): 9.22 (s, 1H), 7.81 (s, 1H), 7.54-7.39 (m, 4H), 7.26-7.16 (m, 4H), 3.93 (s, 3H), 2.49 (s, 3H), 1.51 (s, 3H). Enantiomeric excess was determined by HPLC on Chiralpak IC column (Hexane/Ethanol 95:5 V/V, flow rate 1.0 mL/min, 254 nm,  $\tau_{minor}$  = 6.6 min,  $\tau_{major}$  = 8.4 min, 30% ee). **HRMS** for  $C_{18}H_{19}BrN_2NaO_4$ : calcd.  $[M+Na]^+$ : 429.0420, found: 429.0410,  $[M+2+Na]^+$ : 431.0264.



**(S)-Methyl 3-((3,4-dimethoxyphenyl)amino)-2-(hydroxy(*o*-tolyl)amino)-2-methyl-3-oxopropanoate (4y)**

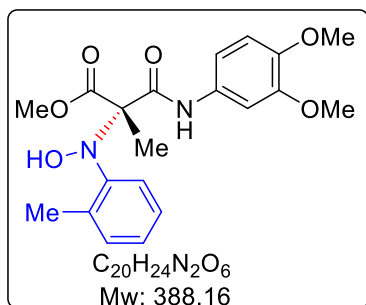

Following the general procedure, treatment of methyl 3-((3,4-dimethoxyphenyl)amino)-2-methyl-3-oxopropanoate (**1l**, 57 mg, 0.20 mmol) with 2-methylnitrosobenzene (**2b**, 29 mg, 0.24 mmol) in the presence of (*R,R*)-TUC (**3a**, 17 mg, 0.04 mmol) in toluene (3 mL) at 0 °C for 4 h followed by column chromatography afforded the product **4y** (27 mg, 35%).  $R_f$  (EtOAc/hexane 3:7) = 0.42. **Mp** 129–131 °C.  $^{13}C$  NMR

(100 MHz,  $\delta$  ppm/ $CDCl_3$ ): 173.4 (C), 168.4 (C), 149.4 (C), 146.2 (C), 144.4 (C), 136.8 (C), 131.5 (CH), 131.4 (C), 127.9 (CH), 127.0 (CH), 123.0 (CH), 111.9 (CH), 111.6 (CH), 104.9 (CH), 74.7 (C), 56.3 (CH<sub>3</sub>), 56.1 (CH<sub>3</sub>), 53.3 (CH<sub>3</sub>), 21.0 (CH<sub>3</sub>), 18.8 (CH<sub>3</sub>).  $^1H$  NMR (400 MHz,  $\delta$  ppm/ $CDCl_3$ ): 9.12 (s, 1H), 7.84 (s, 1H), 7.49 (s, 1H), 7.26–7.18 (m, 4H), 6.91–6.83 (m, 2H), 3.94 (s, 3H), 3.91 (s, 3H), 3.87 (s, 3H), 2.50 (s, 3H), 1.52 (s, 3H). Enantiomeric excess was determined by HPLC on Chiralpak IC column (Hexane/Ethanol 90:10 V/V, flow rate 1.0 mL/min, 254 nm,  $\tau_{minor}$  = 16.5 min,  $\tau_{major}$  = 23.0 min, 30% ee). **HRMS** for  $C_{20}H_{24}N_2NaO_6^+$ : calcd.  $[M+H]^+$ : 411.1527, found: 411.1527.

**Synthesis of methyl-3-((4-bromophenyl)amino)-2-methyl-3-oxo-2-(phenylamino)propanoate (5)**

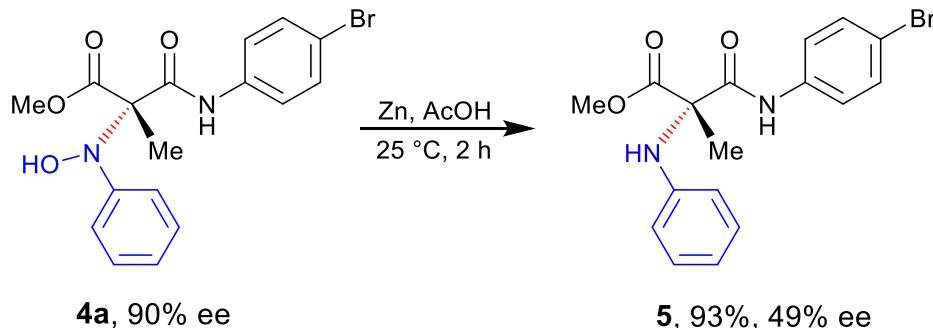

To a 10 mL round-bottomed flask charged with **4a** (78 mg, 0.20 mmol, 1 equiv) were added Zn dust (260 mg, 4.0 mmol, 20 equiv) and acetic acid (2 mL). This reaction mixture was stirred at 25 °C for 2 h. After the completion of the reaction, as indicated by TLC, the reaction was quenched with water and extracted with ethyl acetate. The combined organic layer was washed with saturated solution of  $NaHCO_3$  and brine. After drying over anhydrous  $Na_2SO_4$  the solvent was evaporated under reduced pressure. The residue was purified by column chromatography (100–200 mesh silica gel) using ethyl acetate/hexane as the eluent to afford compound **5** as white solid (70 mg, 93%).  $R_f$  (ethyl acetate/hexane 15:85) = 0.35. **Mp** 183–185 °C.  $^{13}C$  NMR (100 MHz,  $\delta$  ppm/ $CDCl_3$ ): 172.1 (C), 167.6 (C), 142.9 (C), 136.5 (C), 132.1 (CH), 132.1 (CH), 129.6 (CH), 129.6 (CH), 121.5 (CH), 121.5 (CH), 120.5 (CH), 117.4 (C), 116.6 (CH), 116.6 (CH), 66.0 (C), 54.1 (CH<sub>3</sub>), 18.9 (CH<sub>3</sub>).  $^1H$  NMR (400 MHz,  $\delta$  ppm/ $CDCl_3$ ): 8.90 (s, 1H), 7.42 (s, 4H), 7.20 (t,  $J$  = 8.0 Hz, 2H), 6.90 (t,  $J$  = 7.2 Hz, 1H), 6.65 (d,  $J$  = 7.6 Hz,



2H), 5.12 (s, 1H), 3.85 (s, 3H), 1.76 (s, 3H). Enantiomeric excess was determined by HPLC on Chiralpak IA column (Hexane/Ethanol 92:8 V/V, flow rate 1.0 mL/min, 251 nm,  $\tau_{\text{minor}} = 24.9$  min,  $\tau_{\text{major}} = 15.9$  min, 49% ee). **HRMS** for  $\text{C}_{17}\text{H}_{18}\text{BrN}_2\text{O}_3^+$ : calcd.  $[\text{M}+\text{H}]^+$ : 377.0495, found: 377.0498,  $[\text{M}+2+\text{H}]^+$ : 379.0477.

## X-ray data of compound **4a**

### X-ray data collection and structure refinement details of compound **4a**

A good quality colorless single crystal of size  $0.28 \times 0.22 \times 0.19$  mm, was selected under a polarizing microscope and mounted on a glass fiber for data collection. Single crystal X-ray data for compound **4a** were collected on a Rigaku Kappa 3 circle diffractometer equipped with the AFC12 goniometer and enhanced sensitivity (HG) Saturn724+ CCD detector in the  $4 \times 4$  bin mode using the monochromated  $\text{MoK}\alpha$  radiation generated from the microfocus sealed tube MicroMax-003 X-ray generator equipped with specially designed confocal multilayer optics. Data collection was performed using  $\omega$ -scans of  $0.5^\circ$  steps at 293(2) K. Cell determination, data collection, and data reduction was performed using the Rigaku CrystalClear-SM Expert 2.1 b24<sup>2</sup> software. Structure solution and refinement were performed by using SHELXTL-NT.<sup>3</sup> Refinement of coordinates and anisotropic thermal parameters of non-hydrogen atoms were carried out by the full-matrix least-squares method. The hydrogen atoms attached to carbon atoms were generated with idealized geometries and isotropically refined using a riding model.

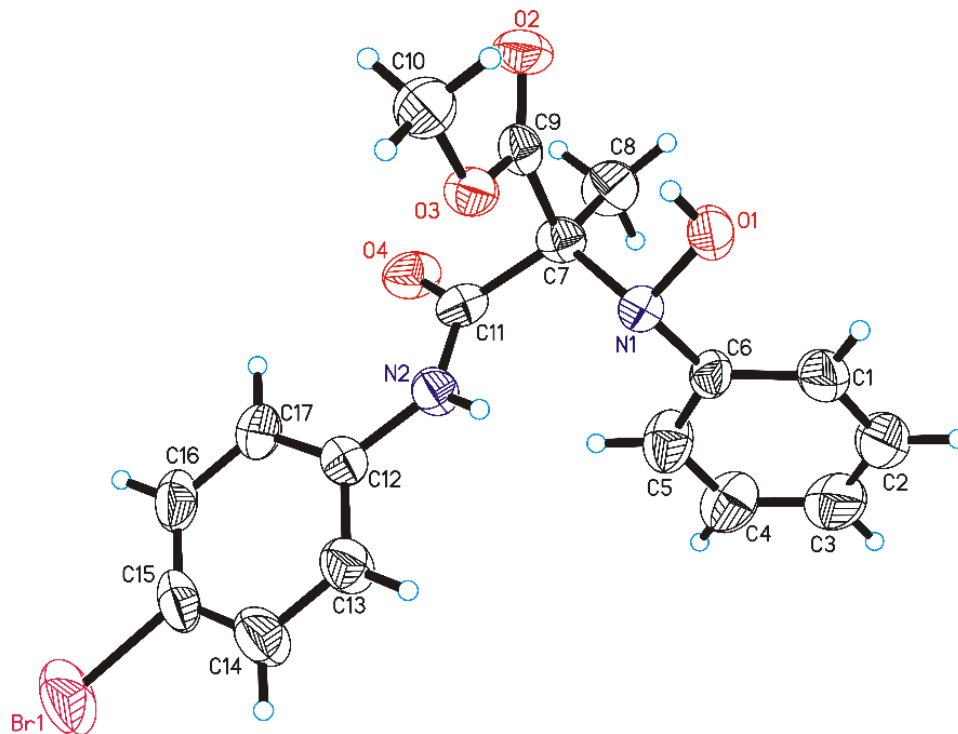

**Figure S1:** ORTEP diagram drawn with 30% ellipsoid probability for non-H atoms of the crystal structure of chiral compound **4a** determined at 293 K. The absolute configuration of C7 is S.

**Table S1:** Crystal data and structure refinement details for compound **4a**.

| Compound                                                                 | 4a                                                               |
|--------------------------------------------------------------------------|------------------------------------------------------------------|
| Empirical formula                                                        | C <sub>17</sub> H <sub>17</sub> Br N <sub>2</sub> O <sub>4</sub> |
| Formula weight                                                           | 393.24                                                           |
| Crystal System                                                           | Orthorhombic                                                     |
| Space group                                                              | <i>P</i> 2 <sub>1</sub> 2 <sub>1</sub> 2 <sub>1</sub>            |
| <i>a</i> (Å)                                                             | 10.151(3)                                                        |
| <i>b</i> (Å)                                                             | 12.755(3)                                                        |
| <i>c</i> (Å)                                                             | 14.560(4)                                                        |
| $\alpha$ (°)                                                             | 90.00                                                            |
| $\beta$ (°)                                                              | 90.00                                                            |
| $\gamma$ (°)                                                             | 90.00                                                            |
| <i>V</i> (Å <sup>3</sup> )                                               | 1885.2(9)                                                        |
| <i>Z</i>                                                                 | 4                                                                |
| D <sub>c</sub> (g/cm <sup>3</sup> )                                      | 1.386                                                            |
| <i>F</i> <sub>000</sub>                                                  | 800                                                              |
| $\mu$ (mm <sup>-1</sup> )                                                | 2.201                                                            |
| $\theta_{\max}$ (°)                                                      | 25.36                                                            |
| Total reflections                                                        | 12849                                                            |
| Unique reflections                                                       | 3413                                                             |
| Reflections [ <i>I</i> > 2 $\sigma$ ( <i>I</i> )]                        | 1773                                                             |
| Parameters                                                               | 217                                                              |
| <i>R</i> <sub>int</sub>                                                  | 0.0488                                                           |
| Goodness-of-fit                                                          | 0.959                                                            |
| <i>R</i> [ <i>F</i> <sup>2</sup> > 2 $\sigma$ ( <i>F</i> <sup>2</sup> )] | 0.0488                                                           |
| <i>wR</i> ( <i>F</i> <sup>2</sup> , all data)                            | 0.1242                                                           |
| CCDC No.                                                                 | 1898632                                                          |

## References

1. R. A. Dhokale, P. R. Thakare, S. B. Mhaske, *Org. Lett.* **2012**, *14*, 3994.
2. CrystalClear 2.1, Rigaku Corporation, Tokyo, Japan.
3. G. M. Sheldrick, *Acta Crystallogr., Sect. A* 2008, **64**, 112.

# Copies of $^1\text{H}$ and $^{13}\text{C}$ NMR spectra for all compounds

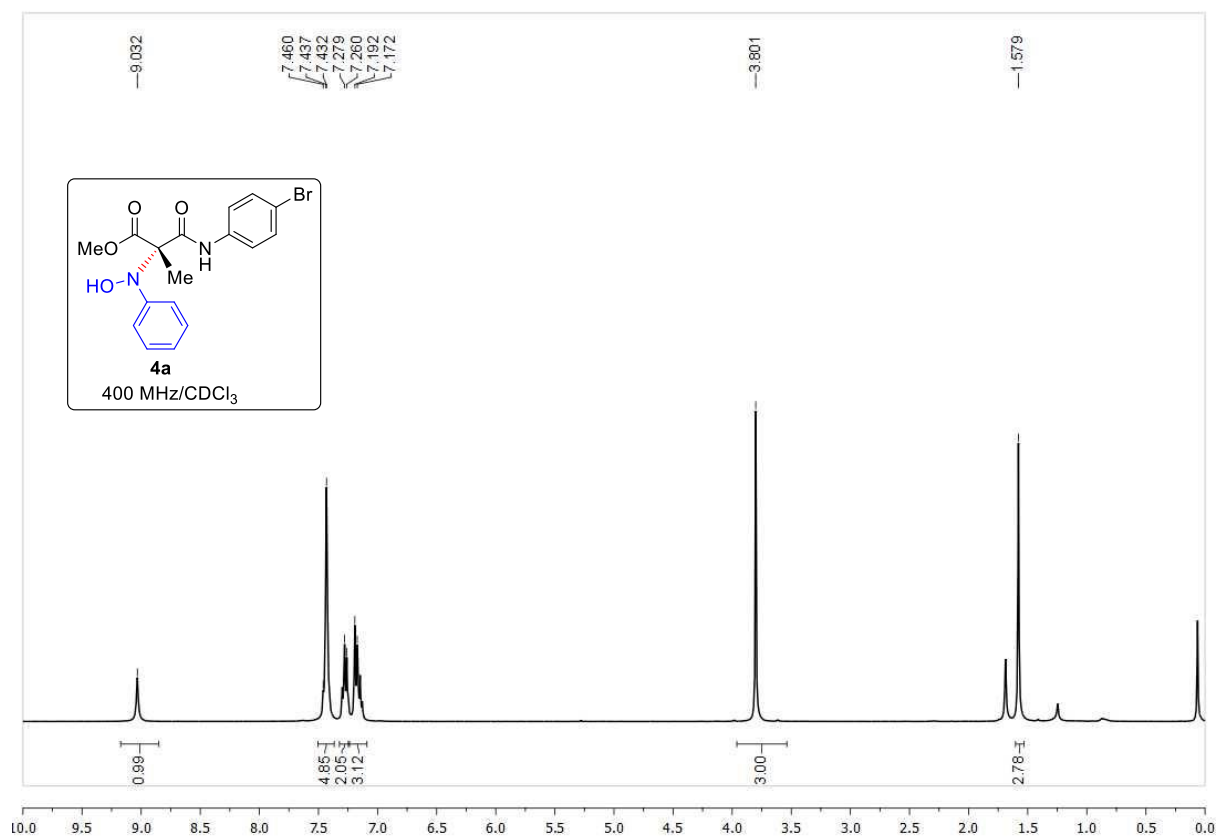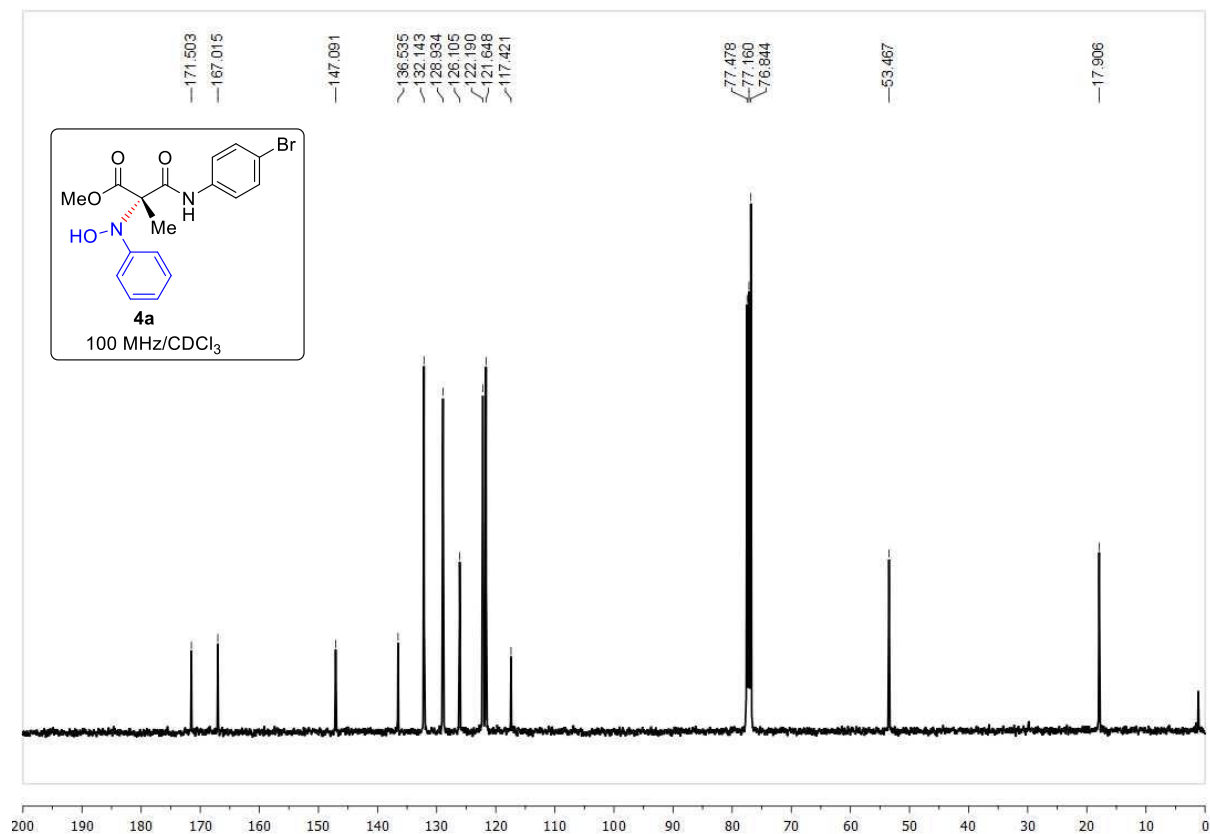

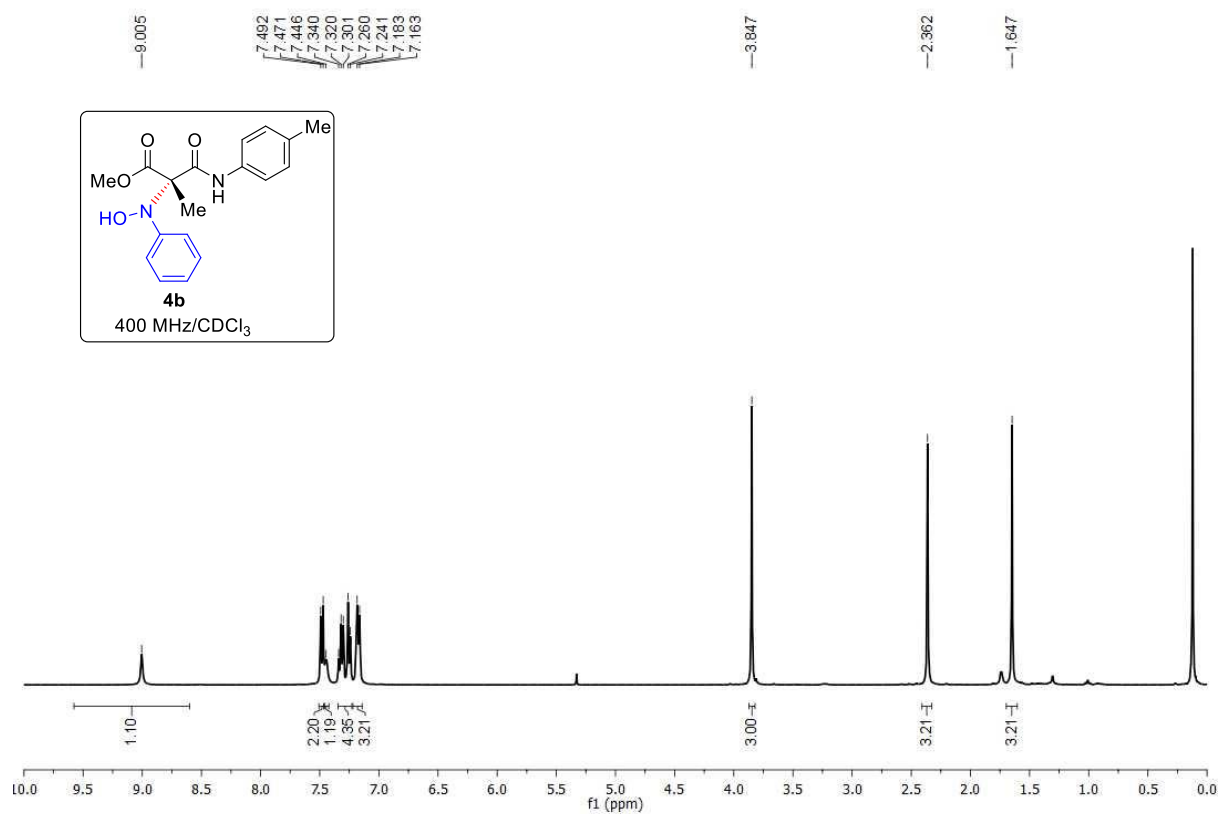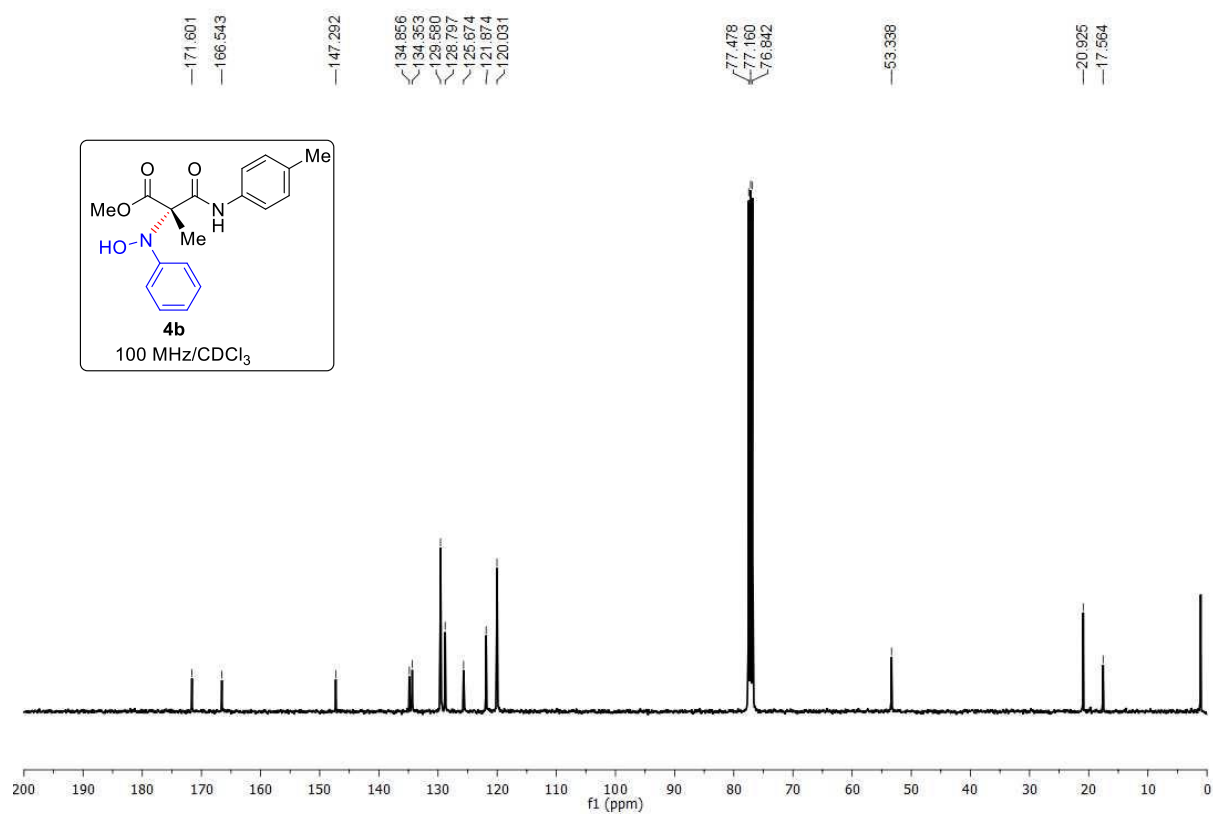

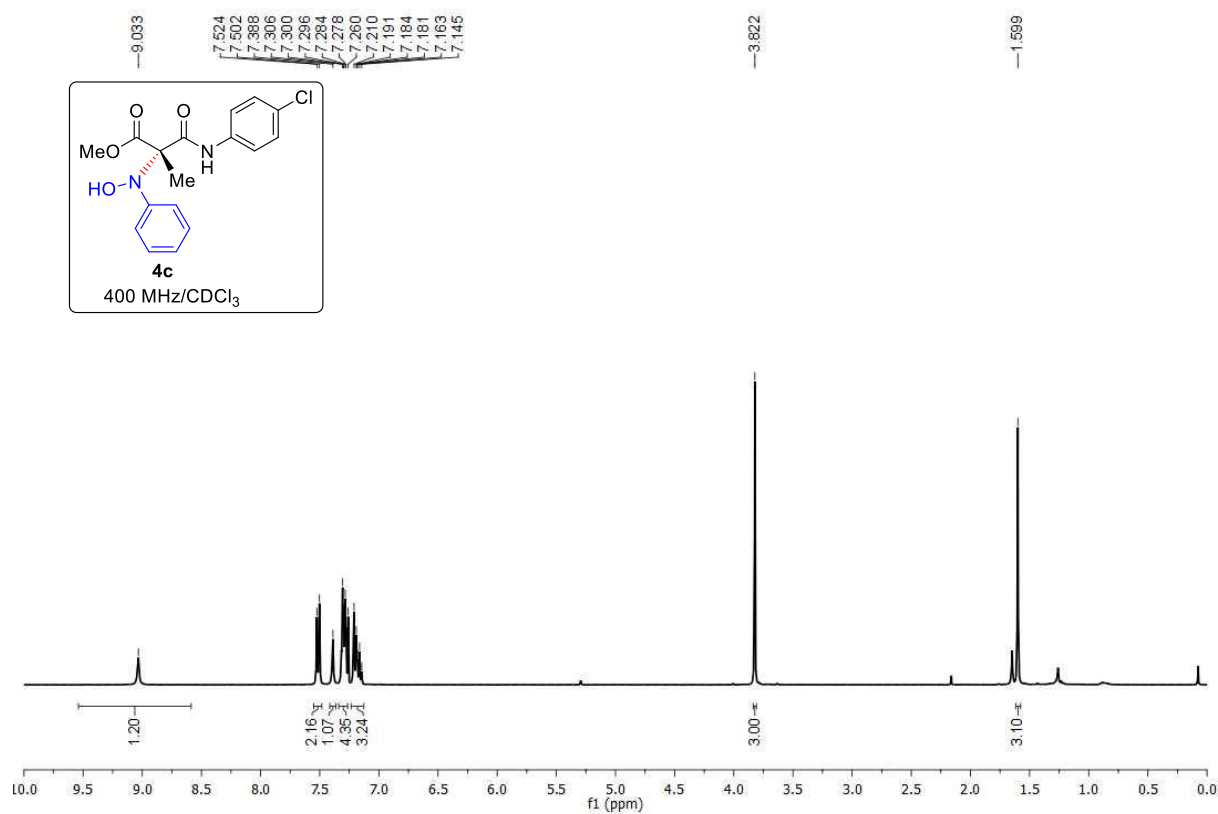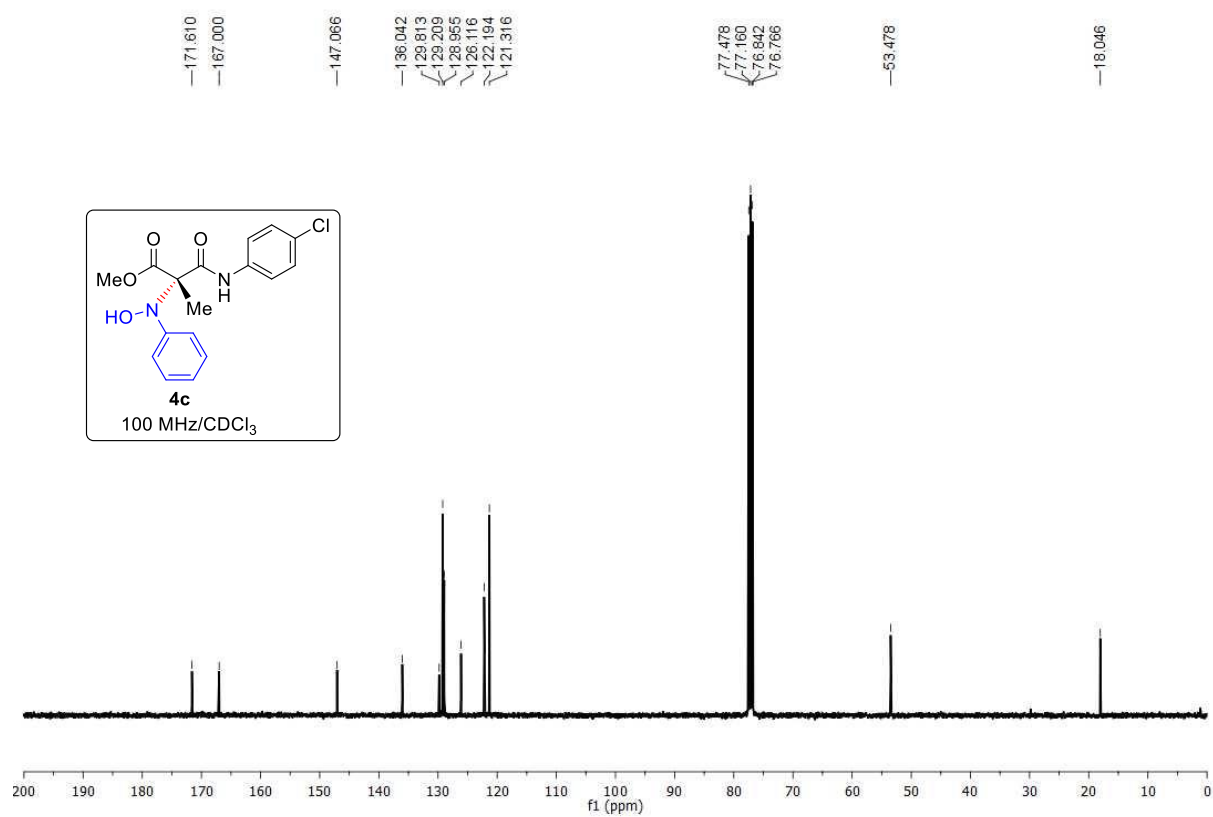

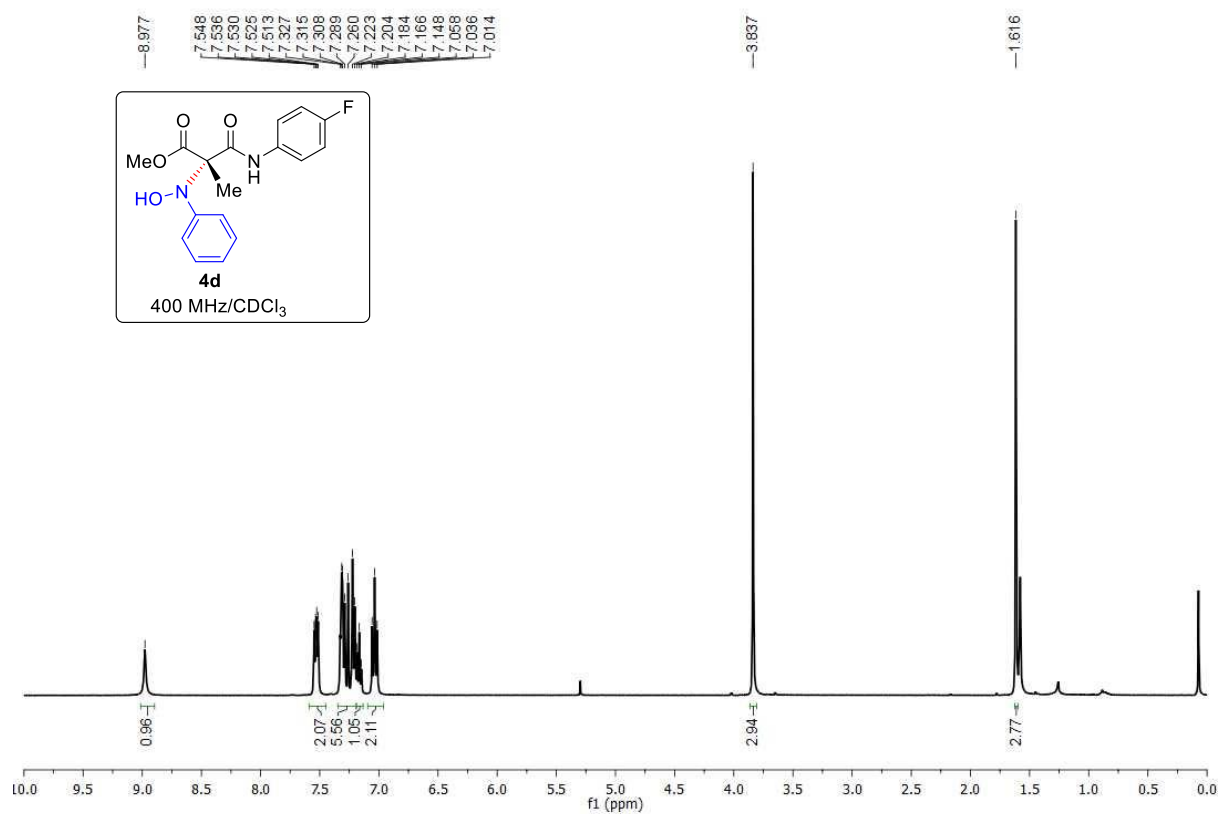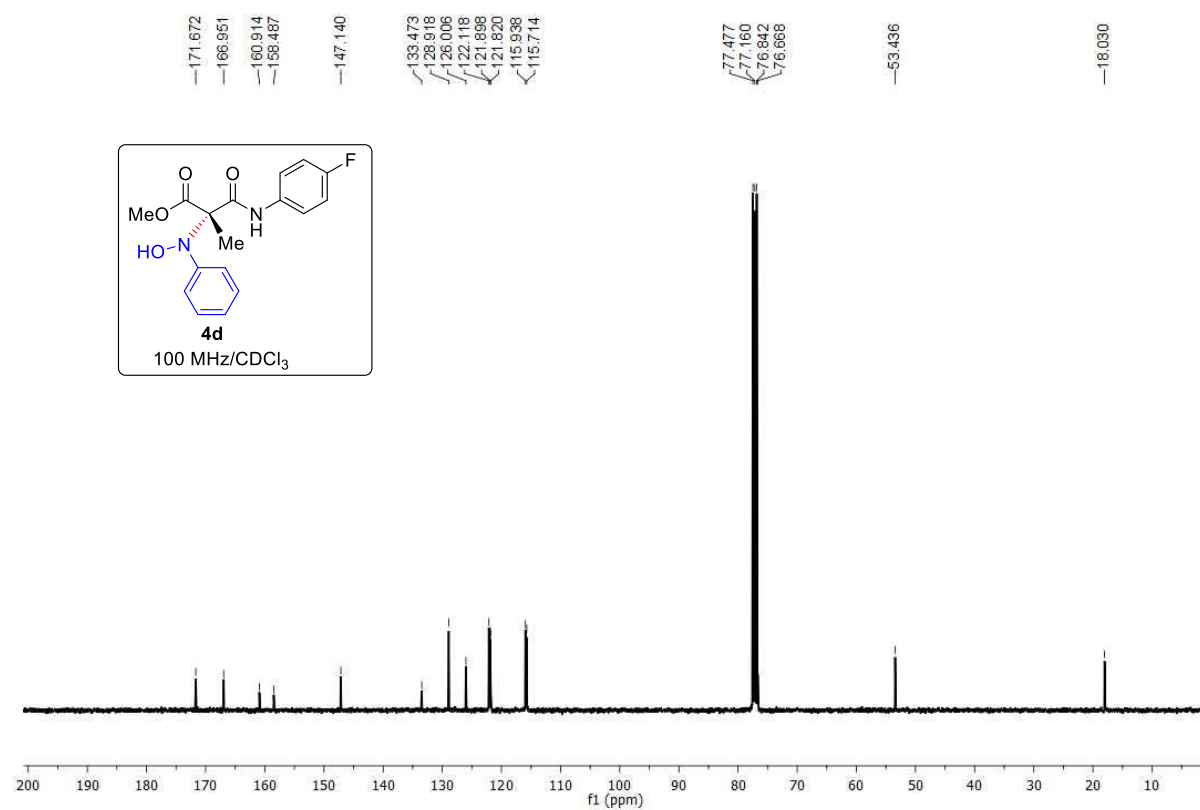

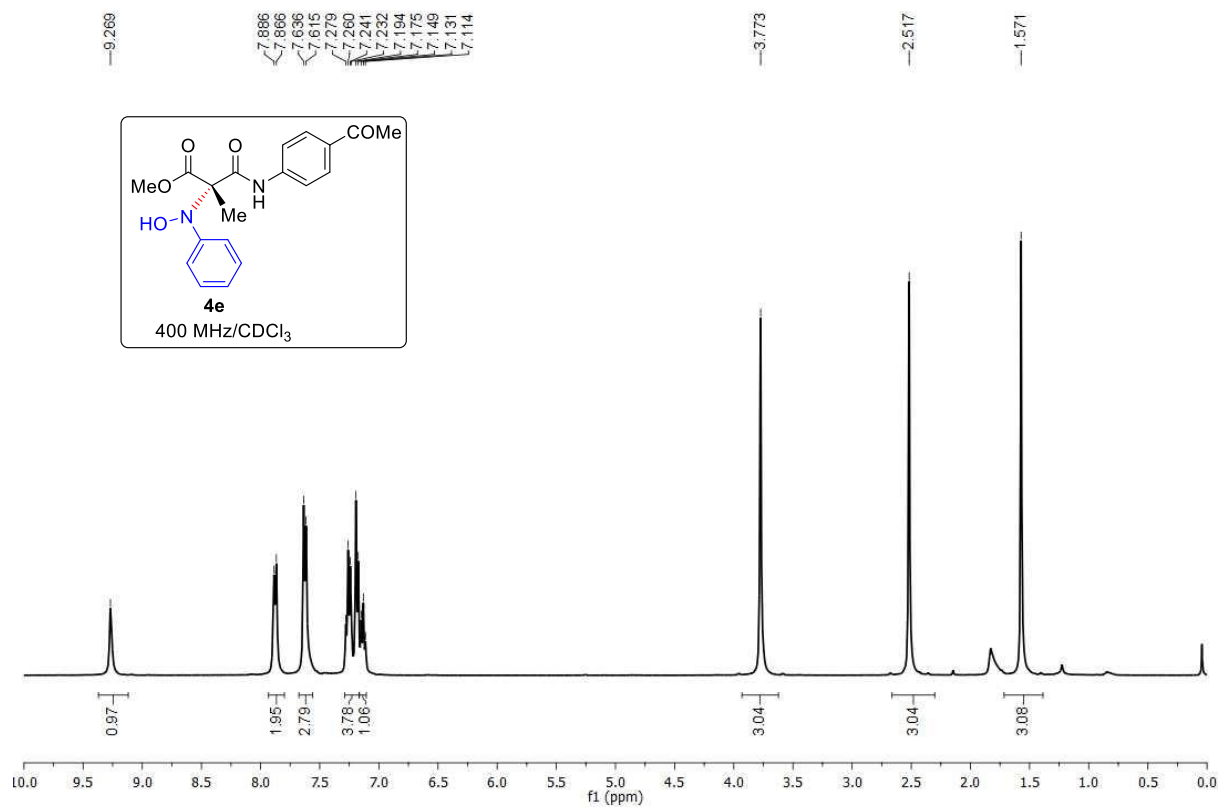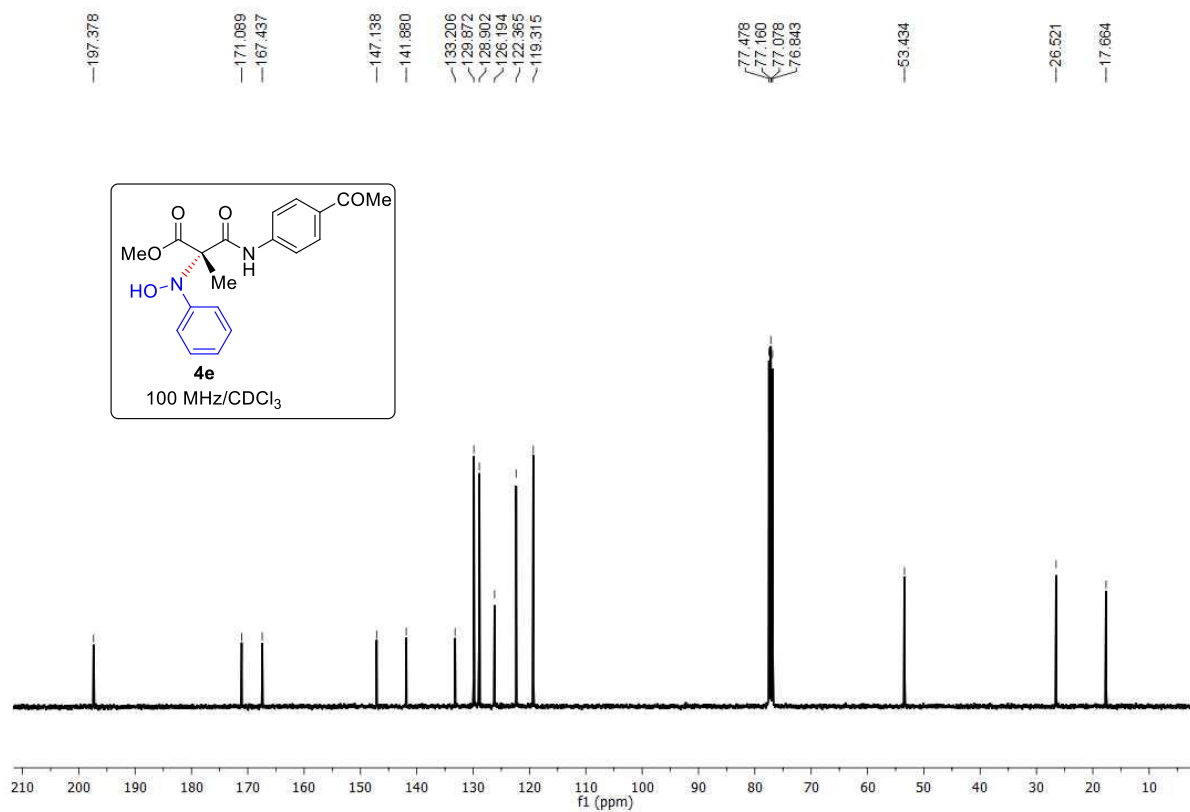

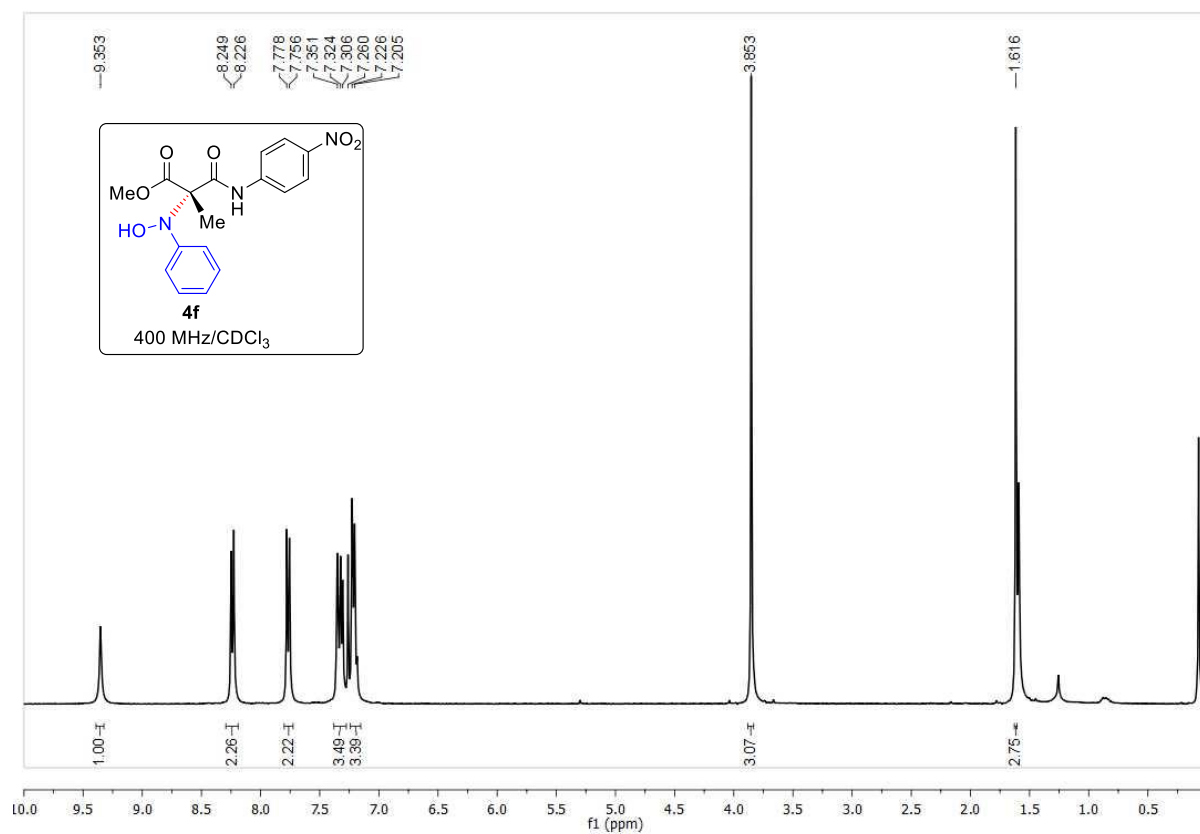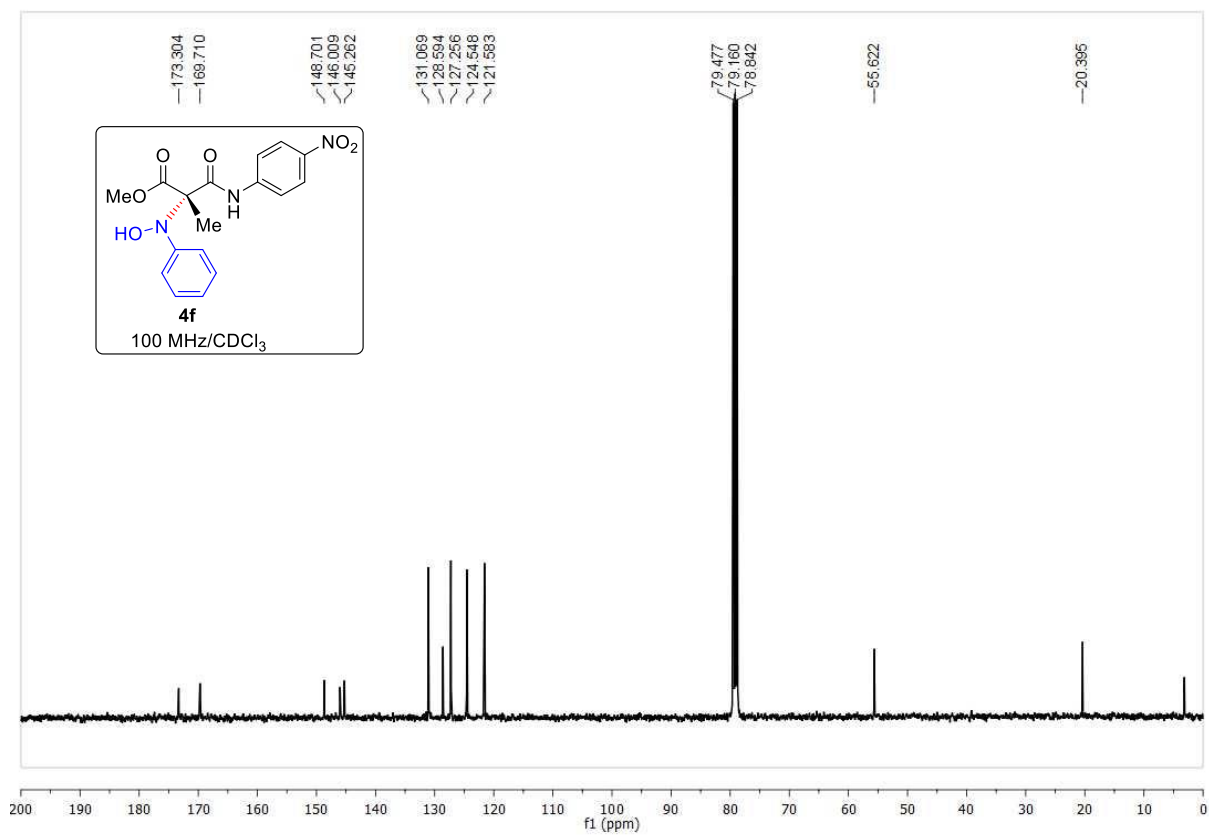



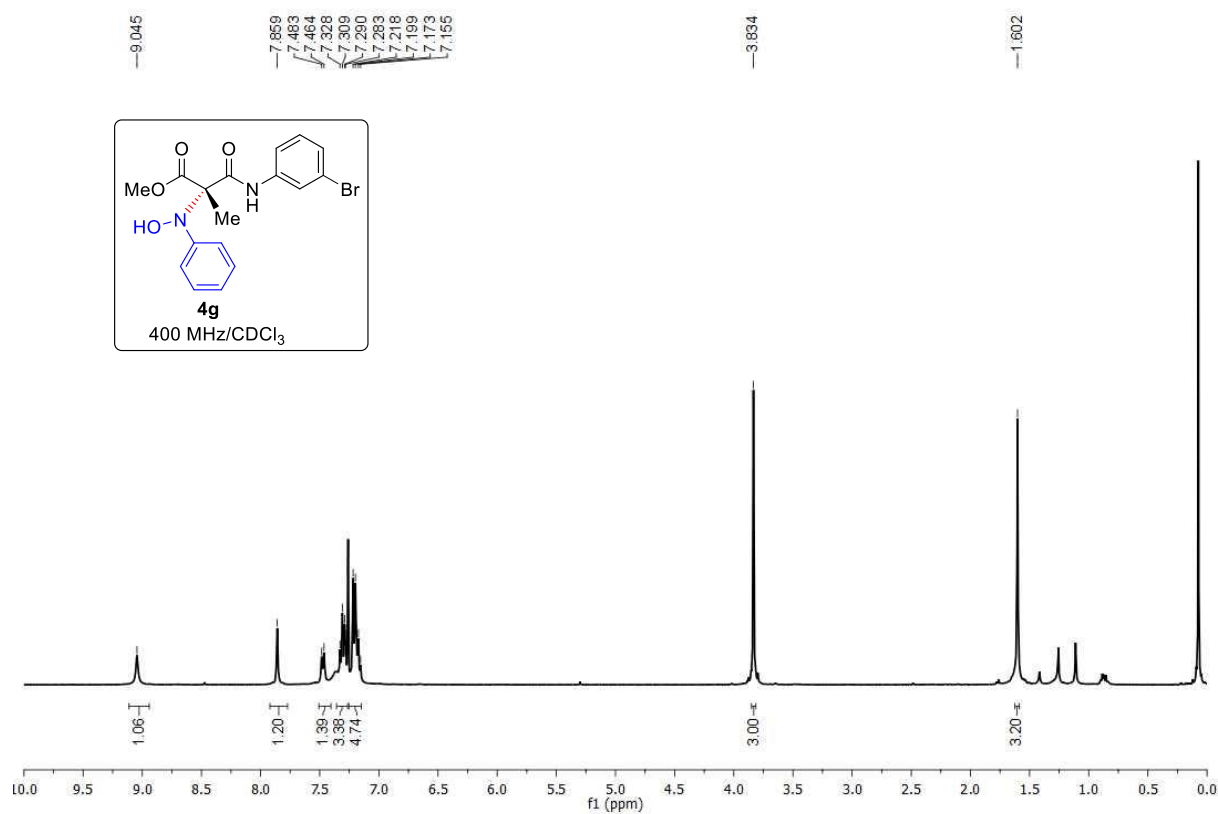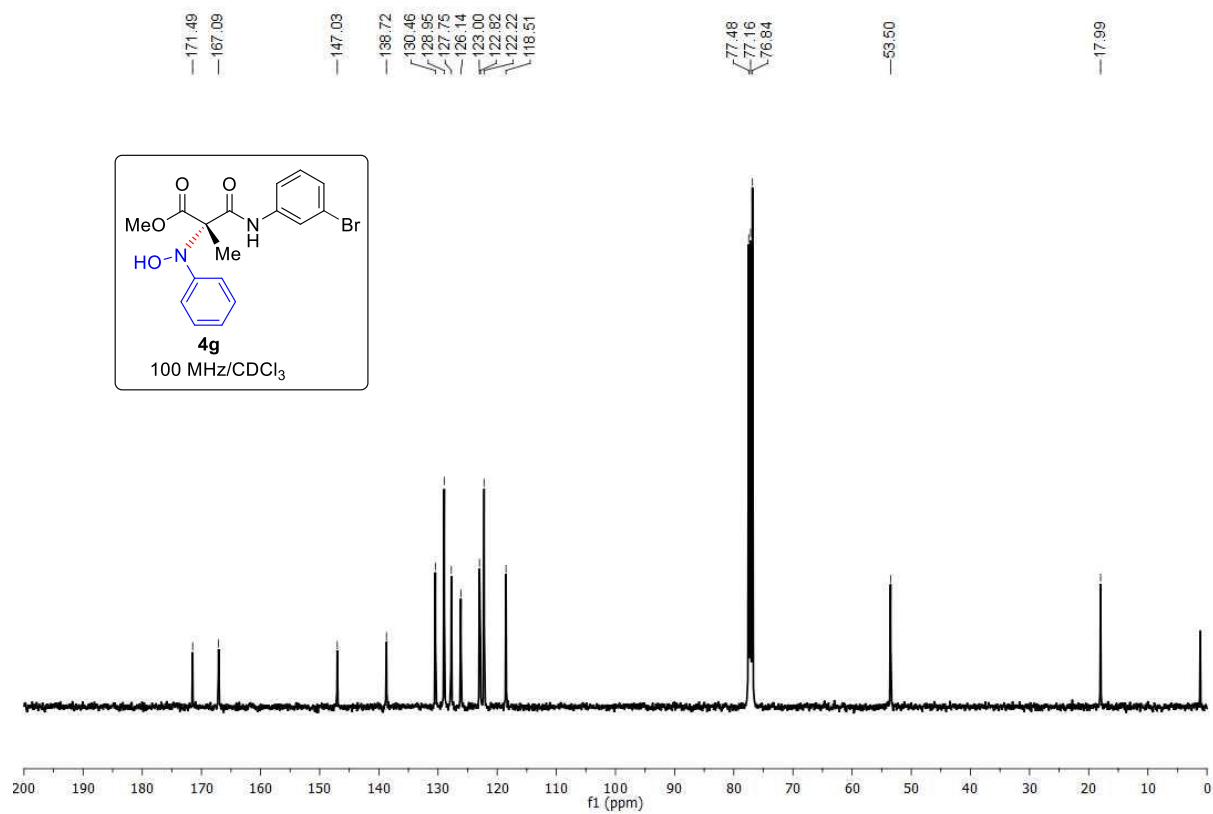

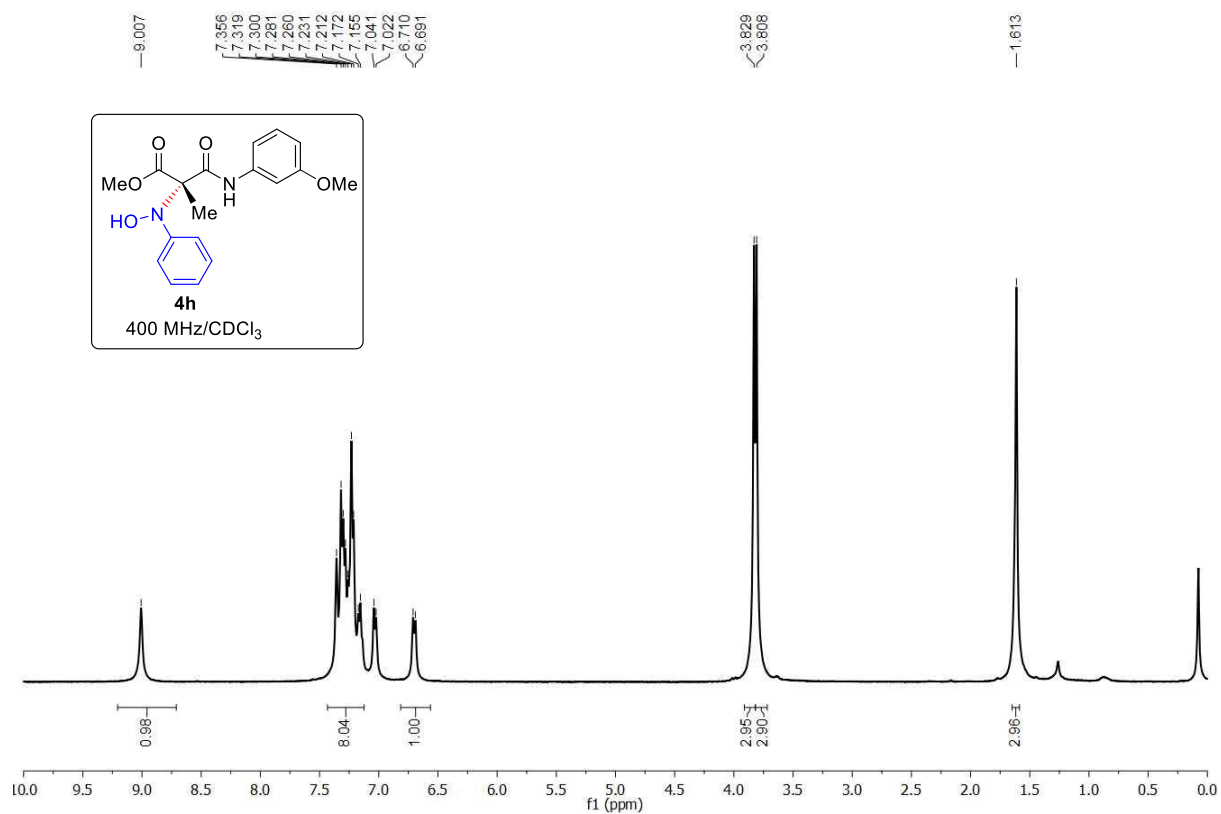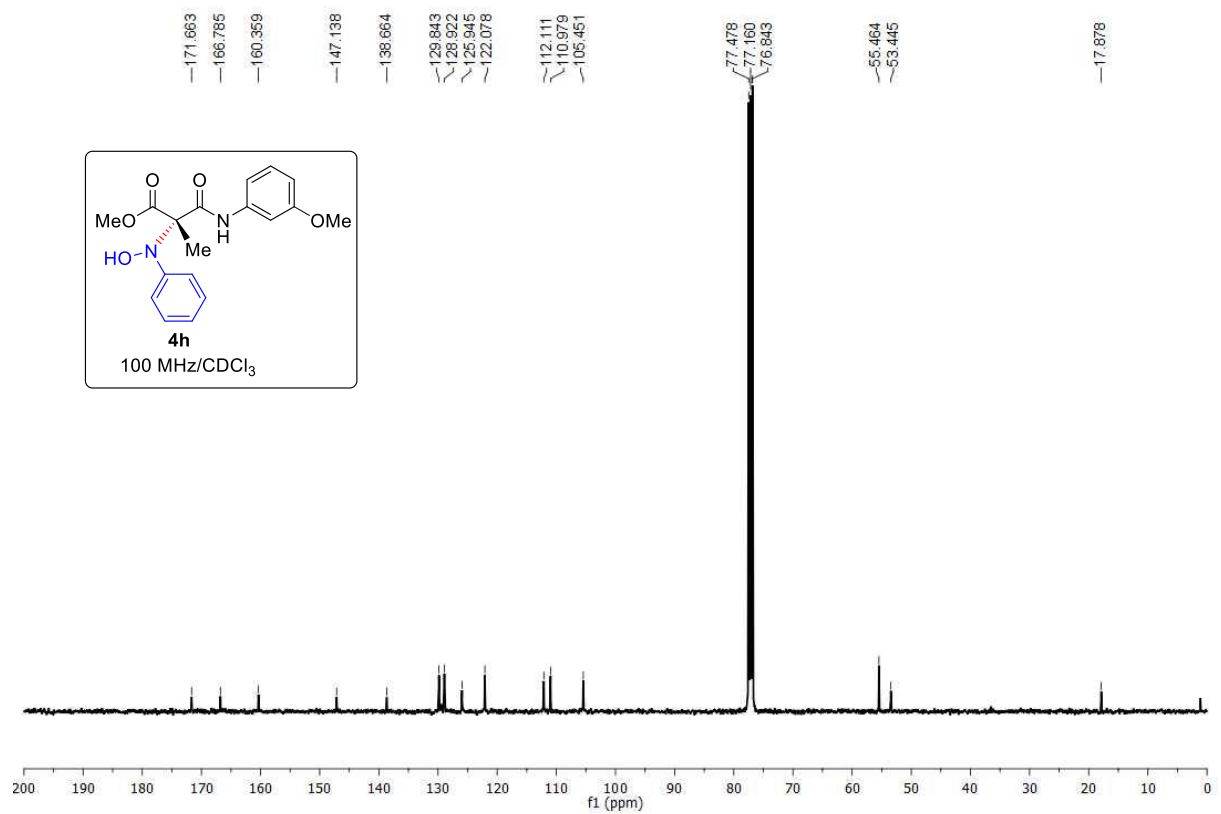

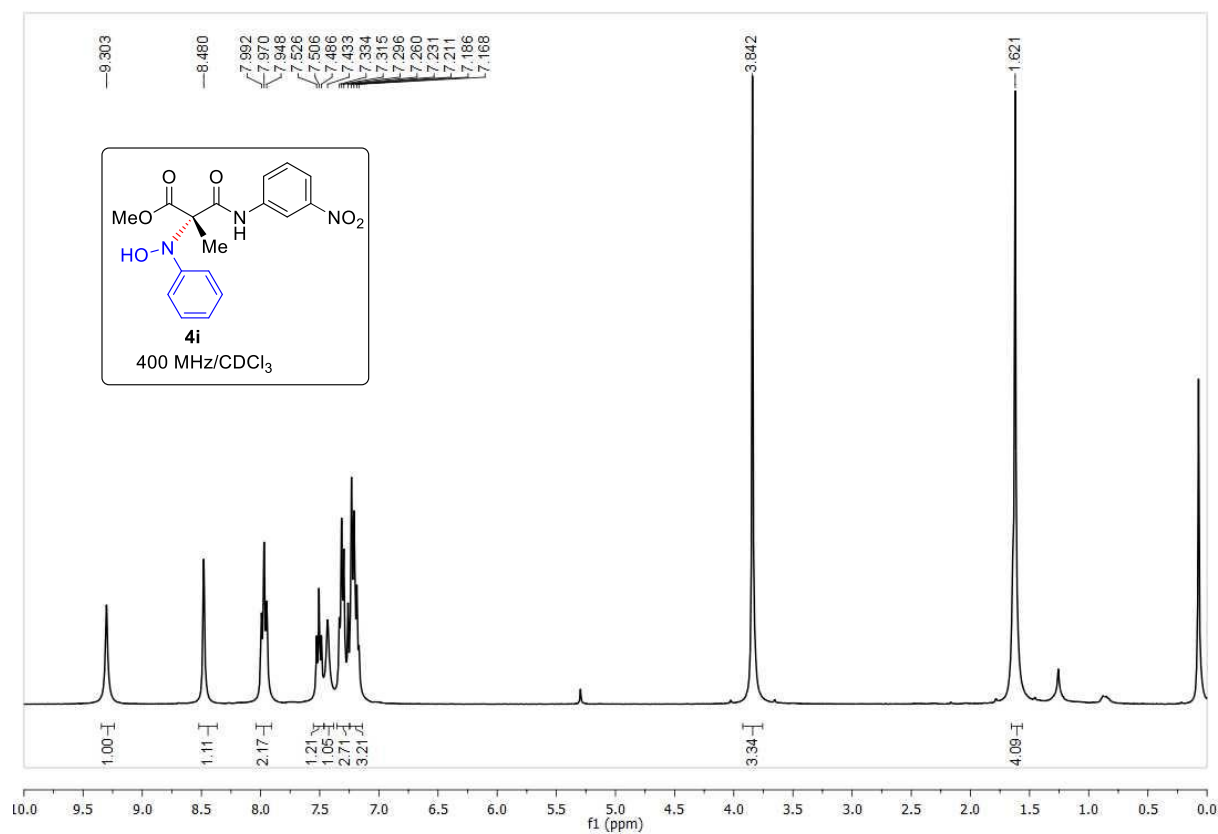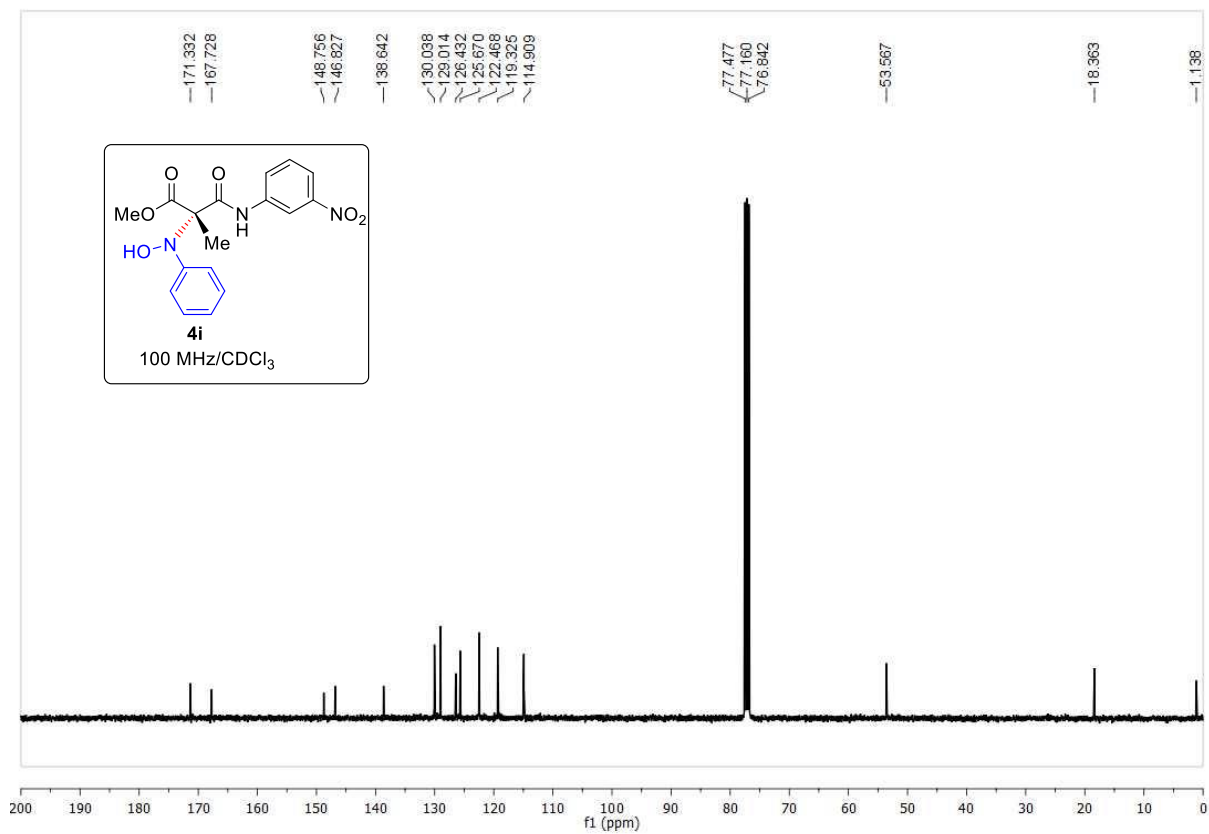

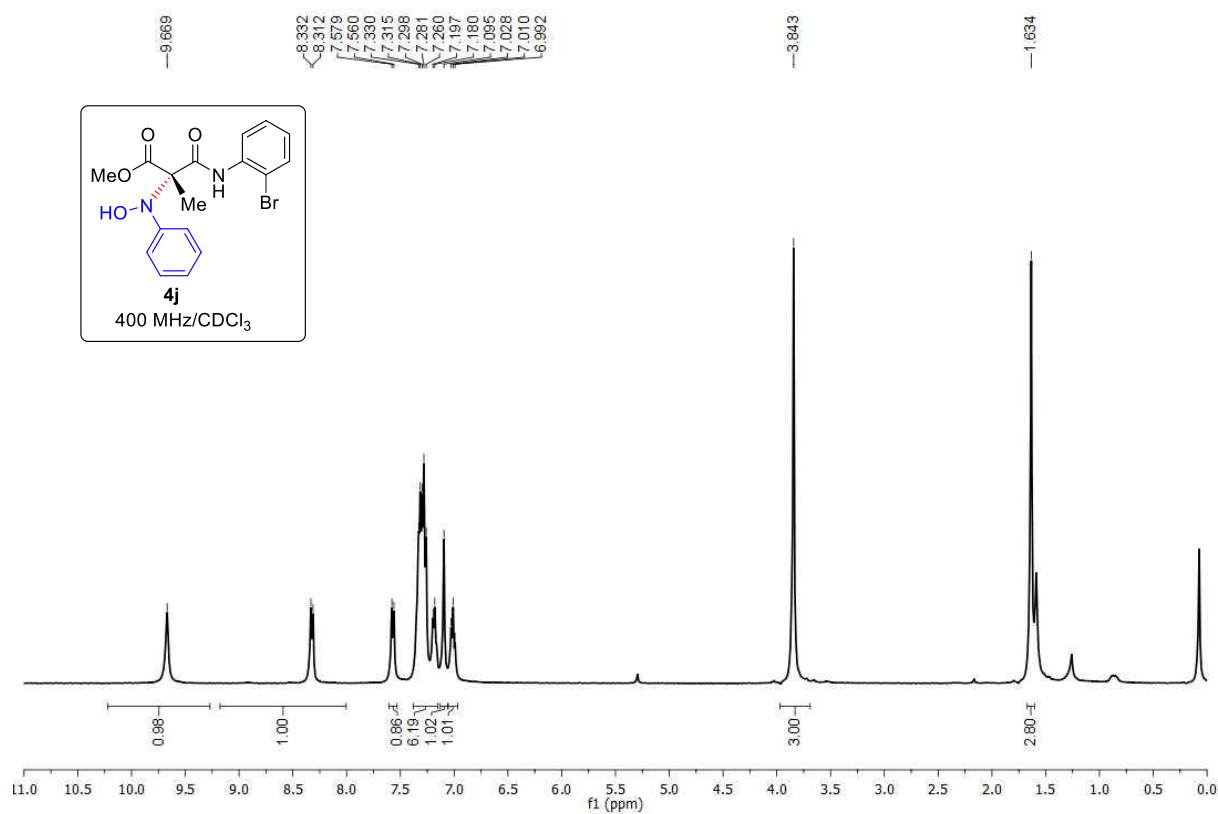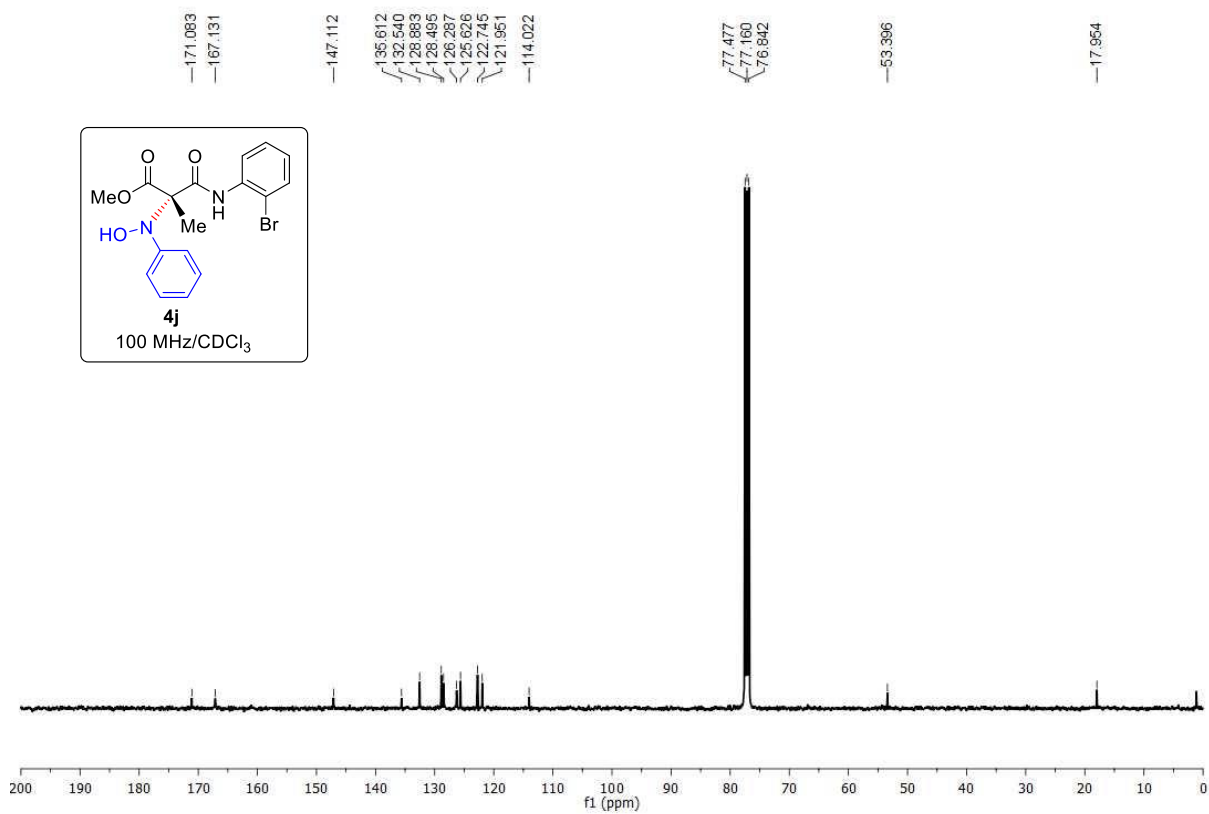

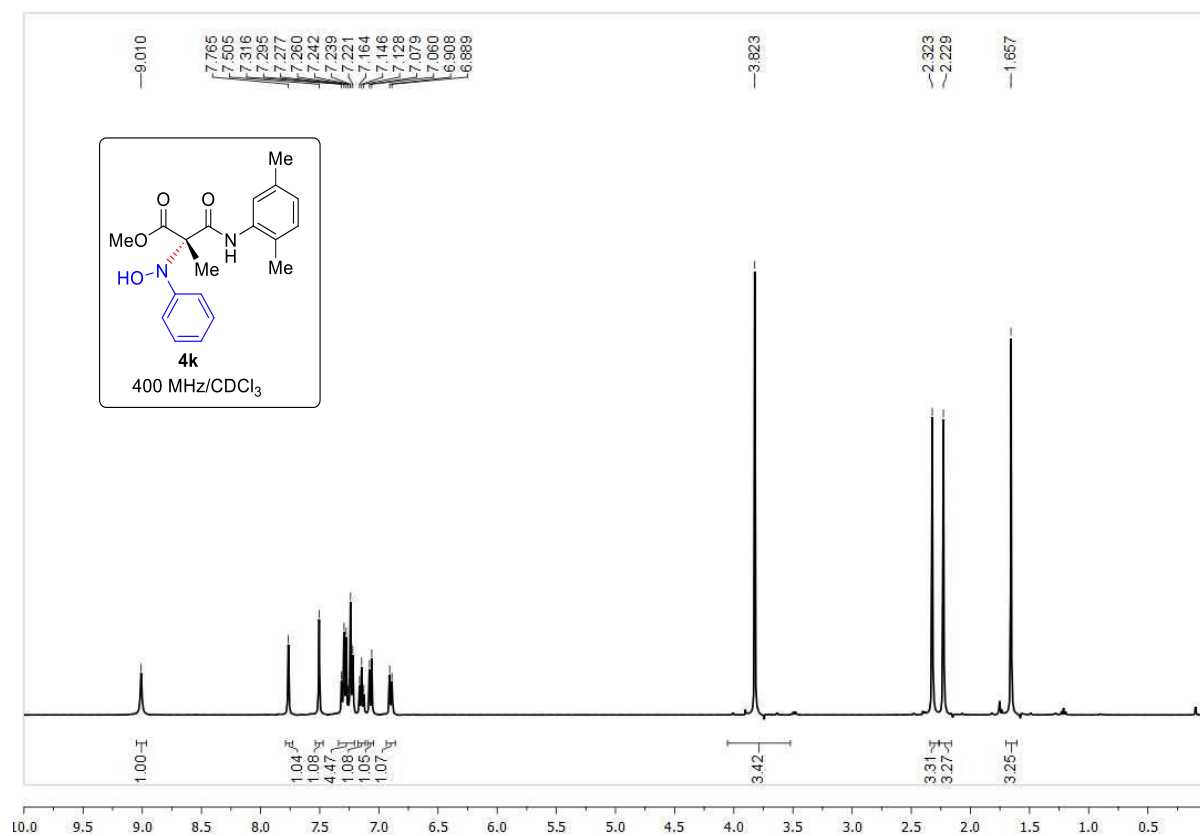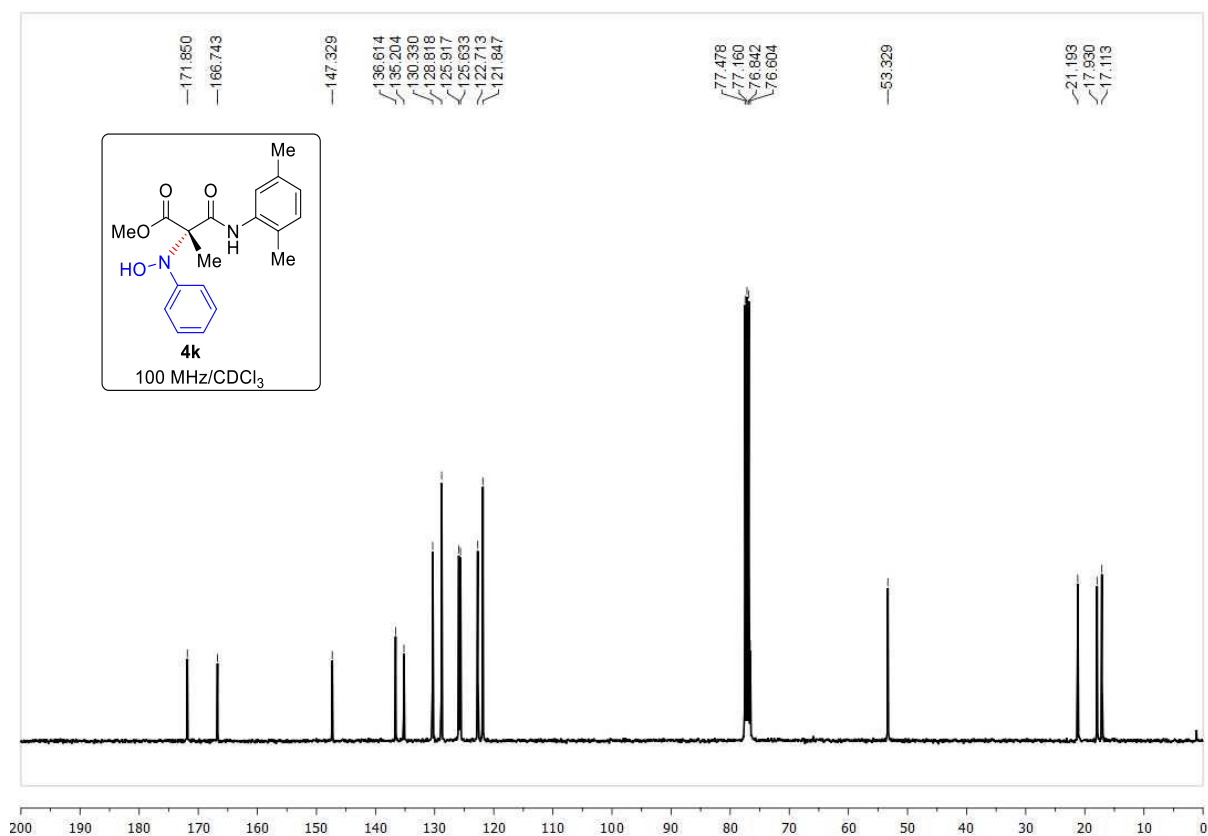

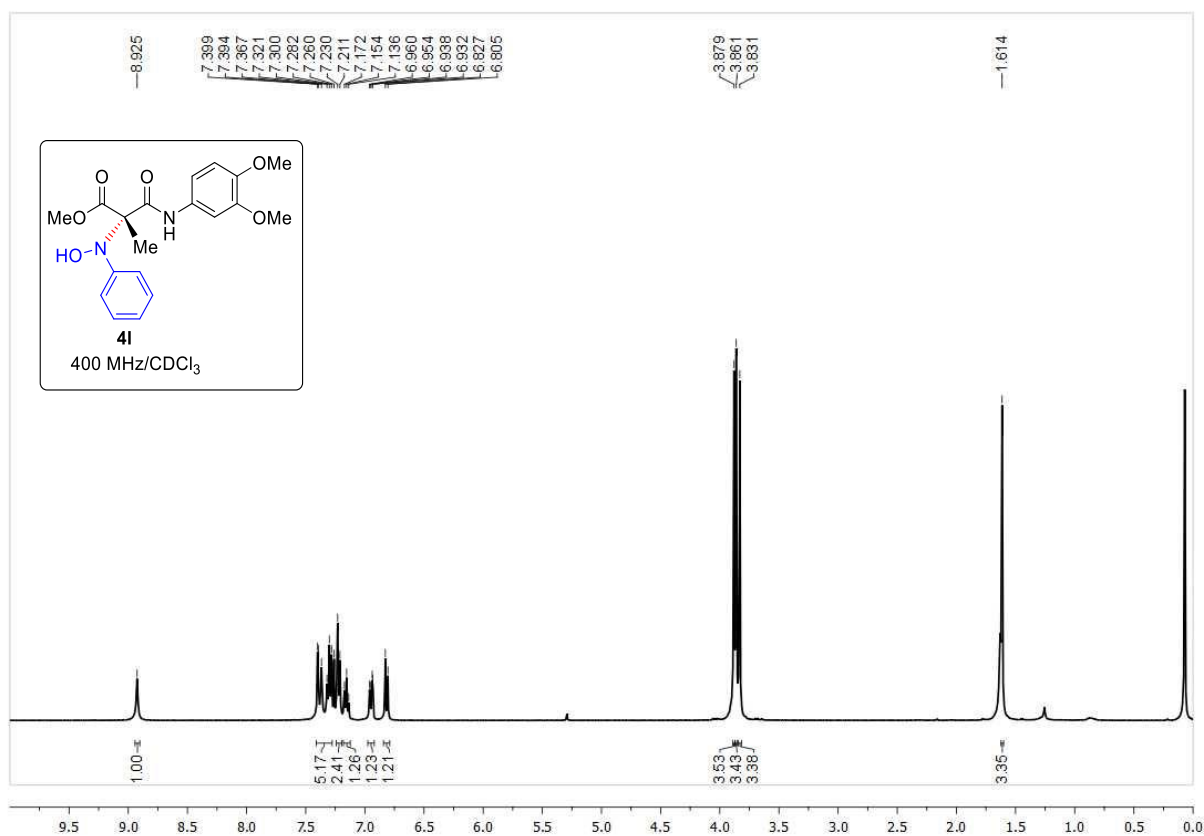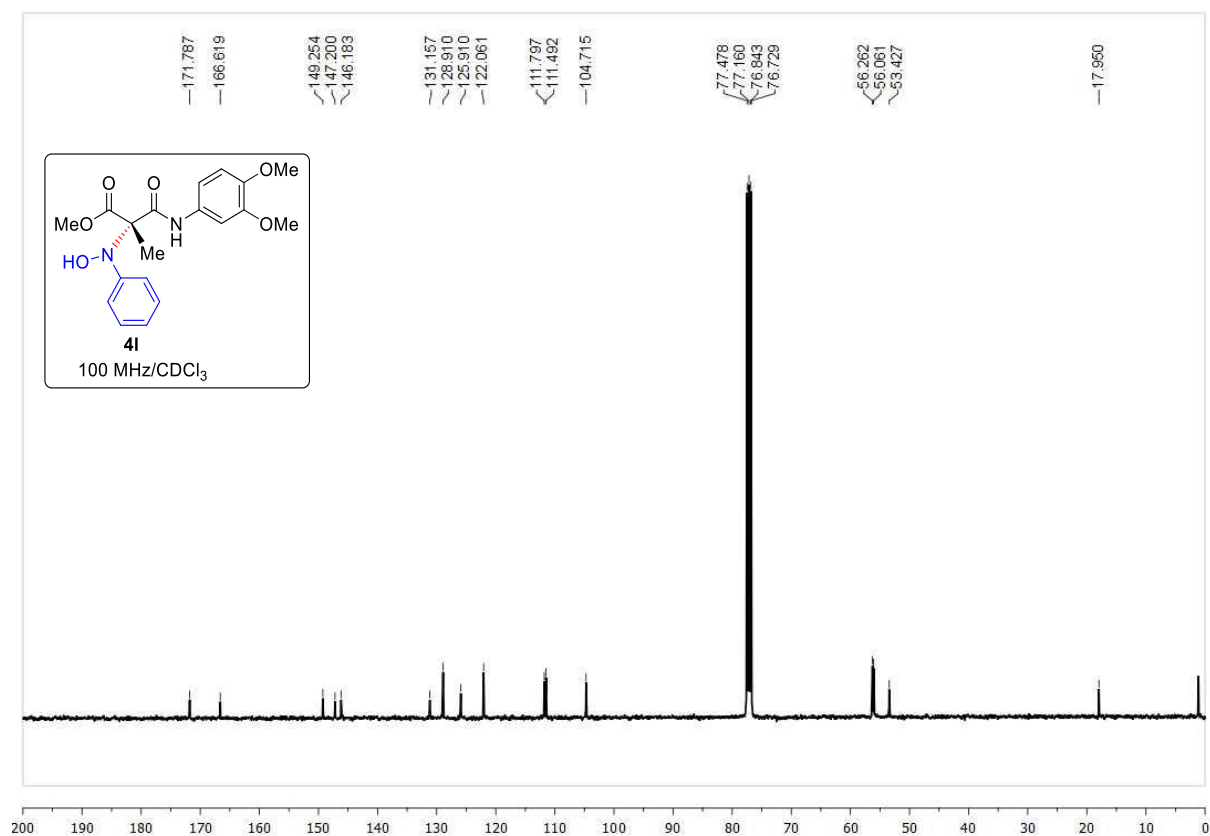

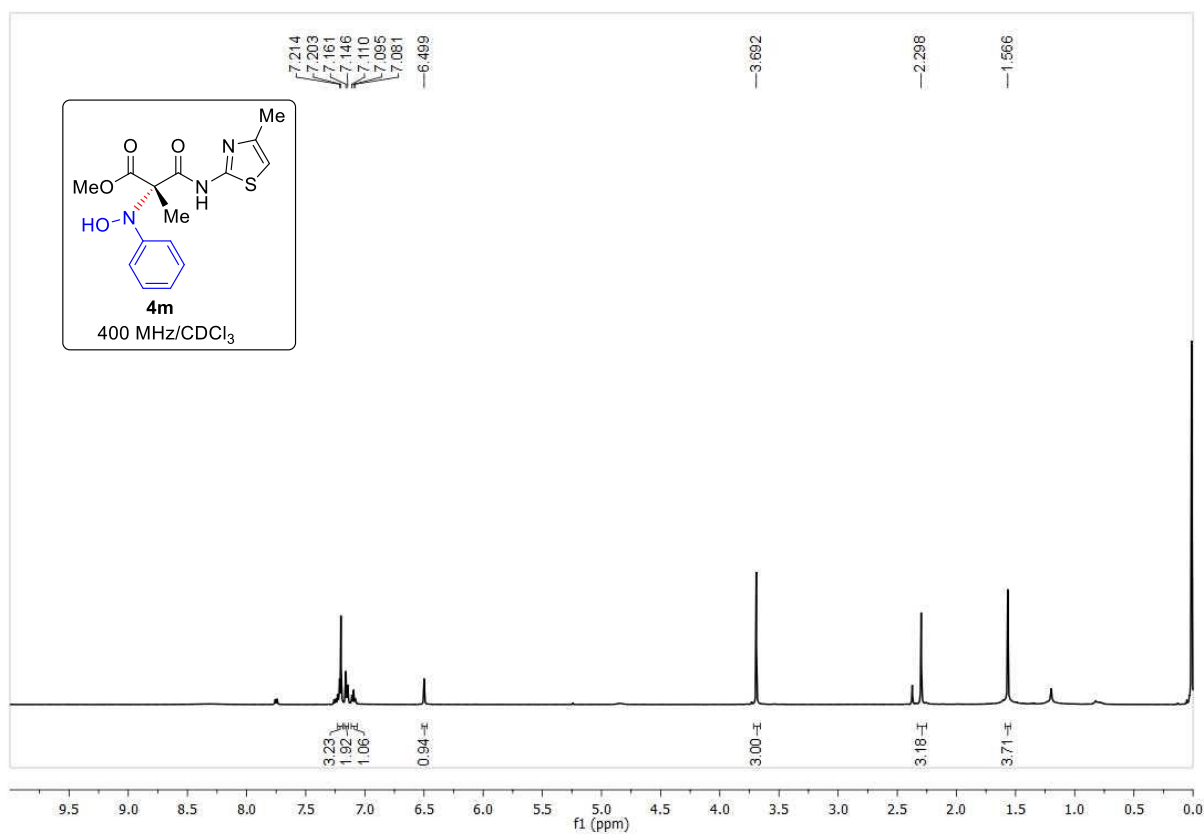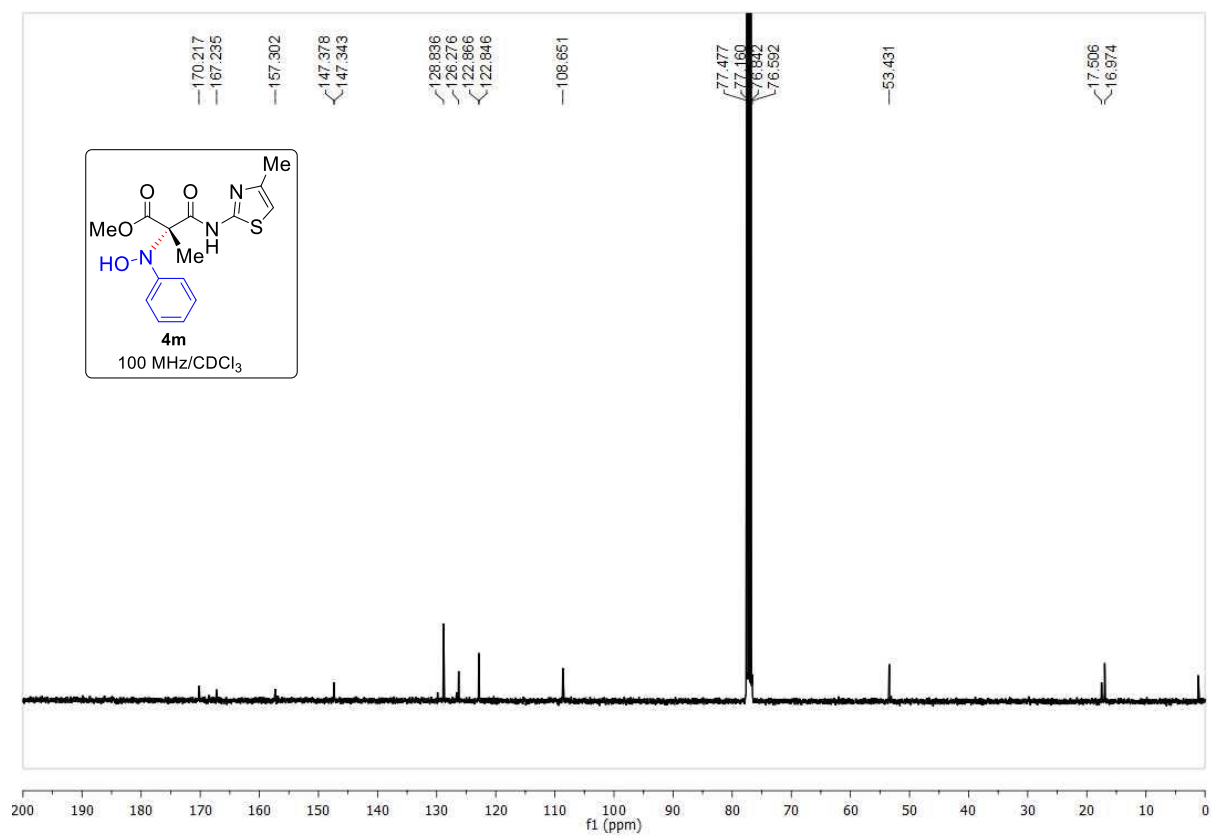

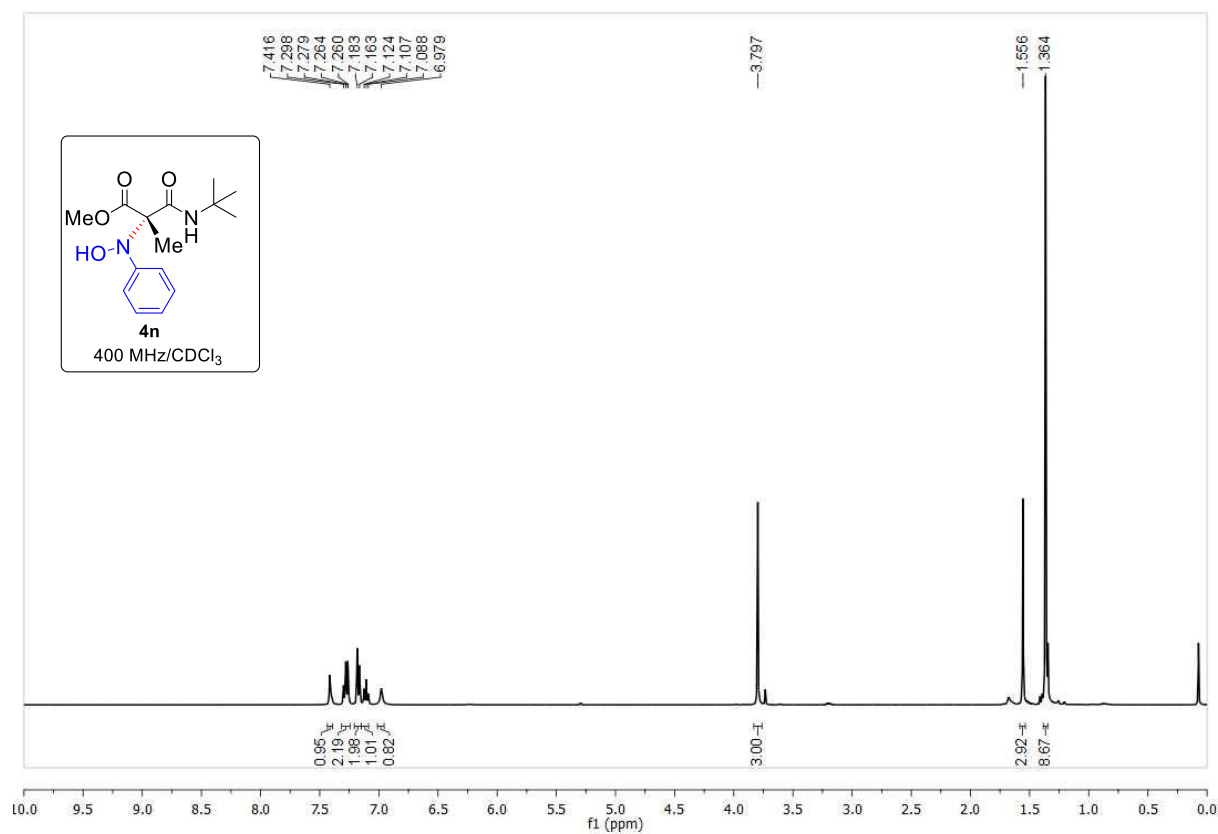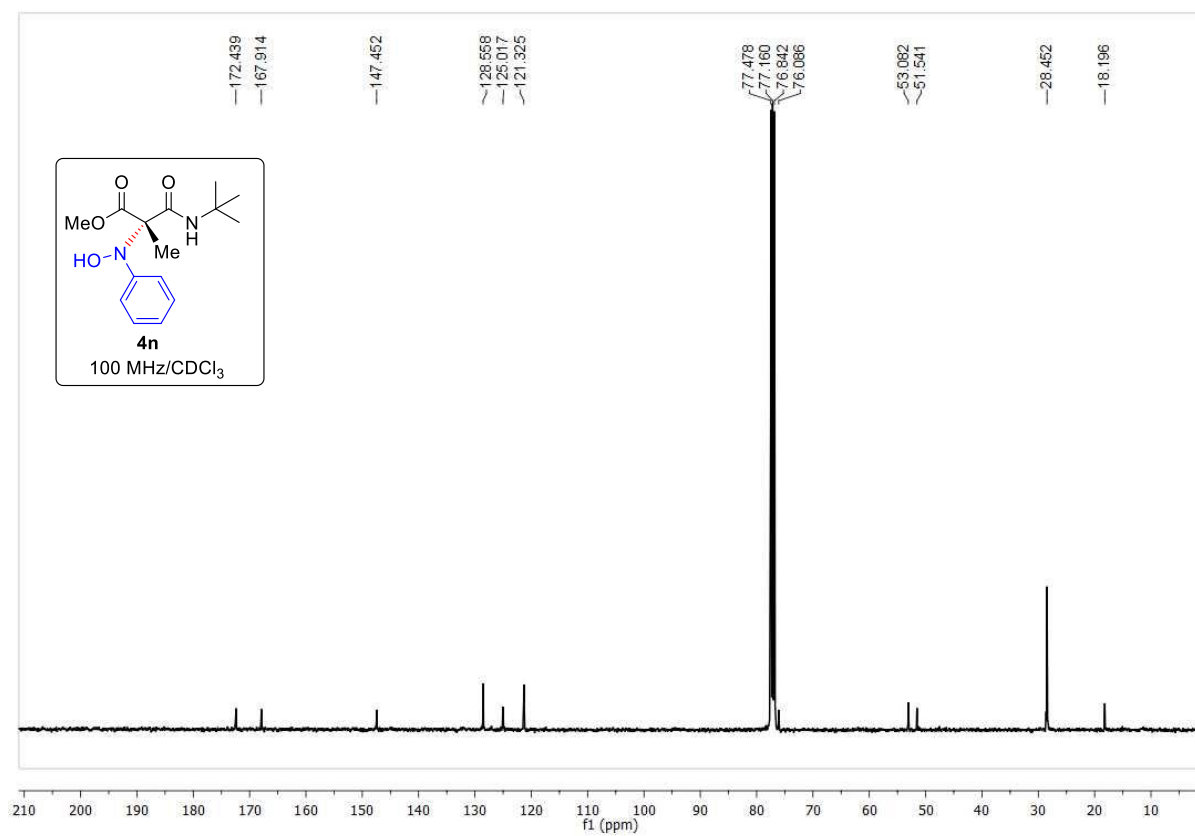



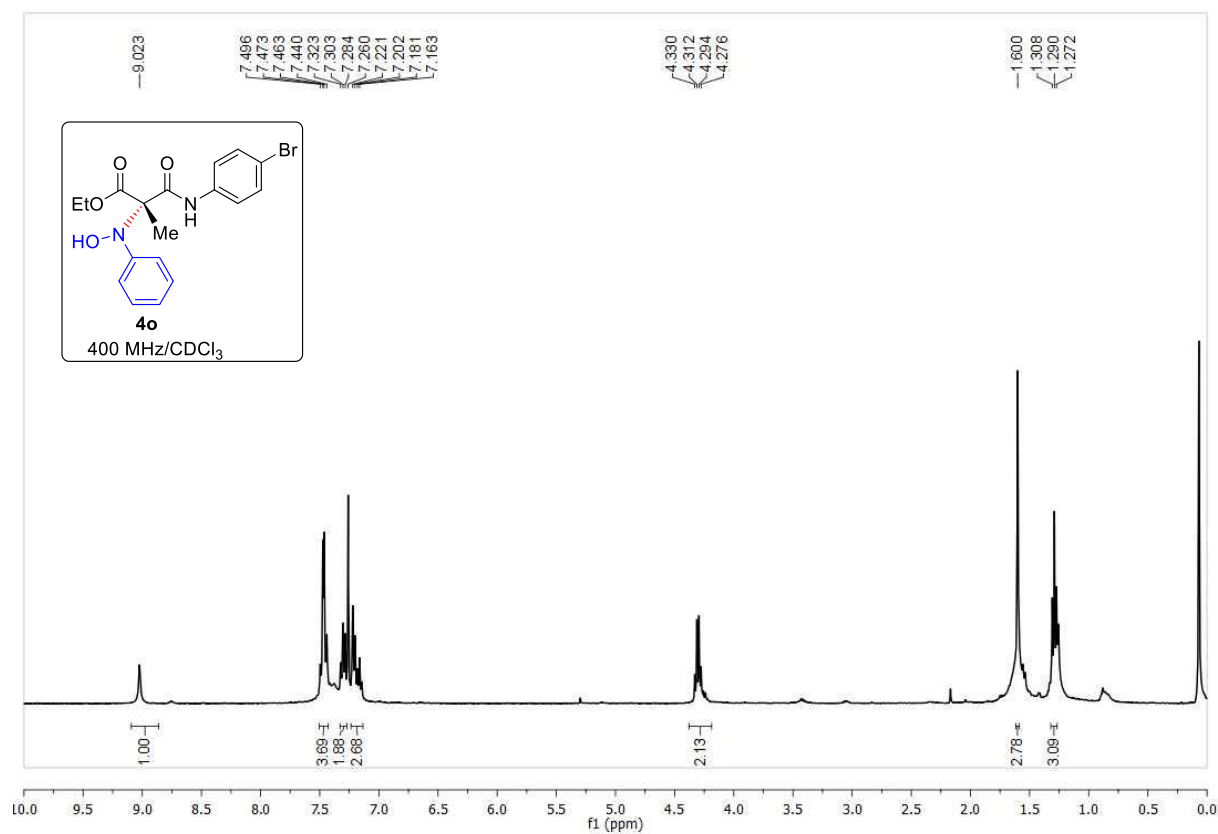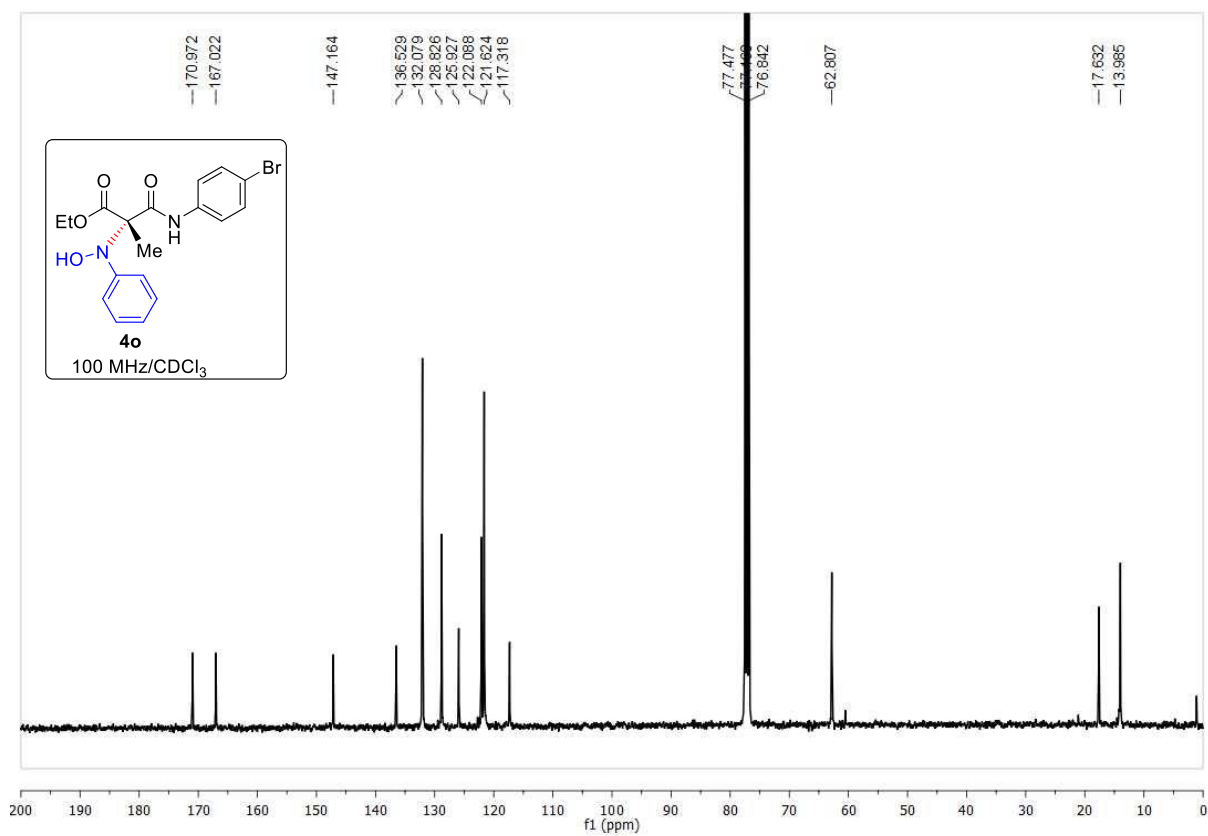

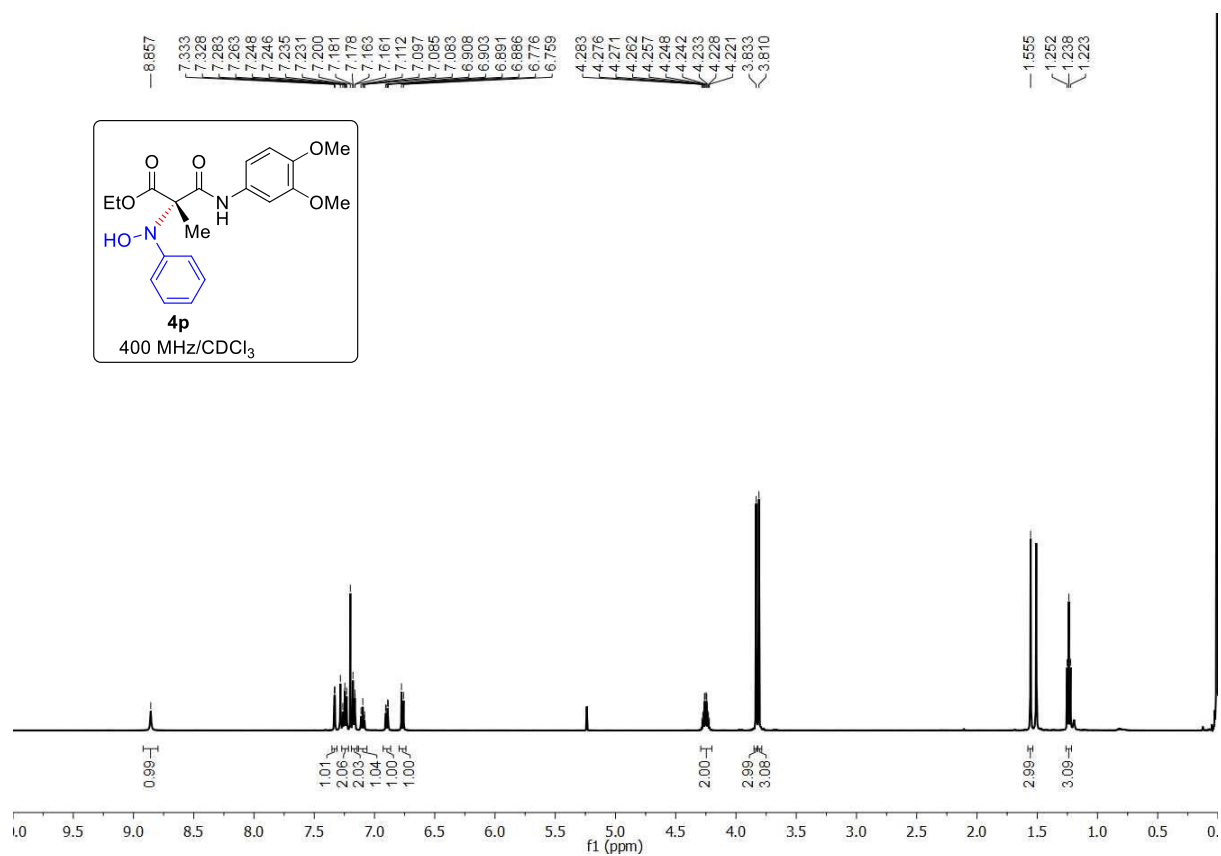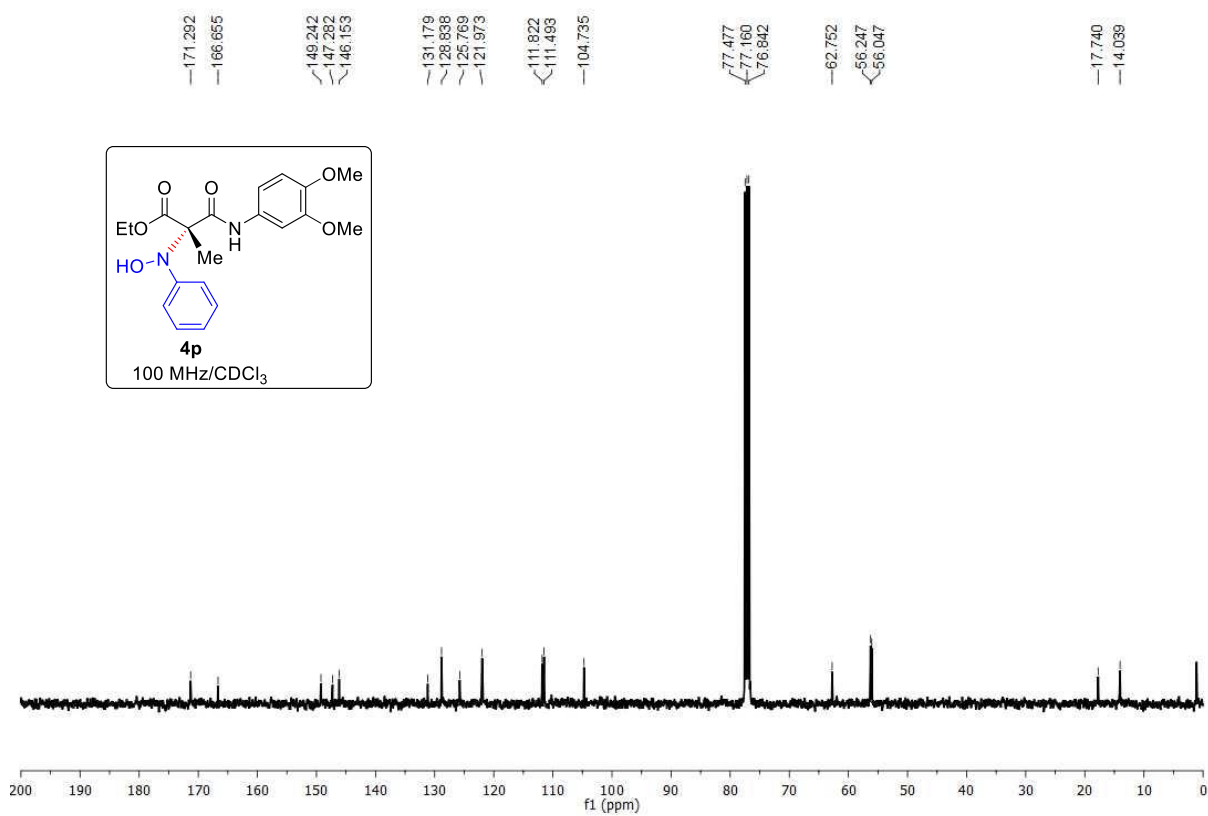

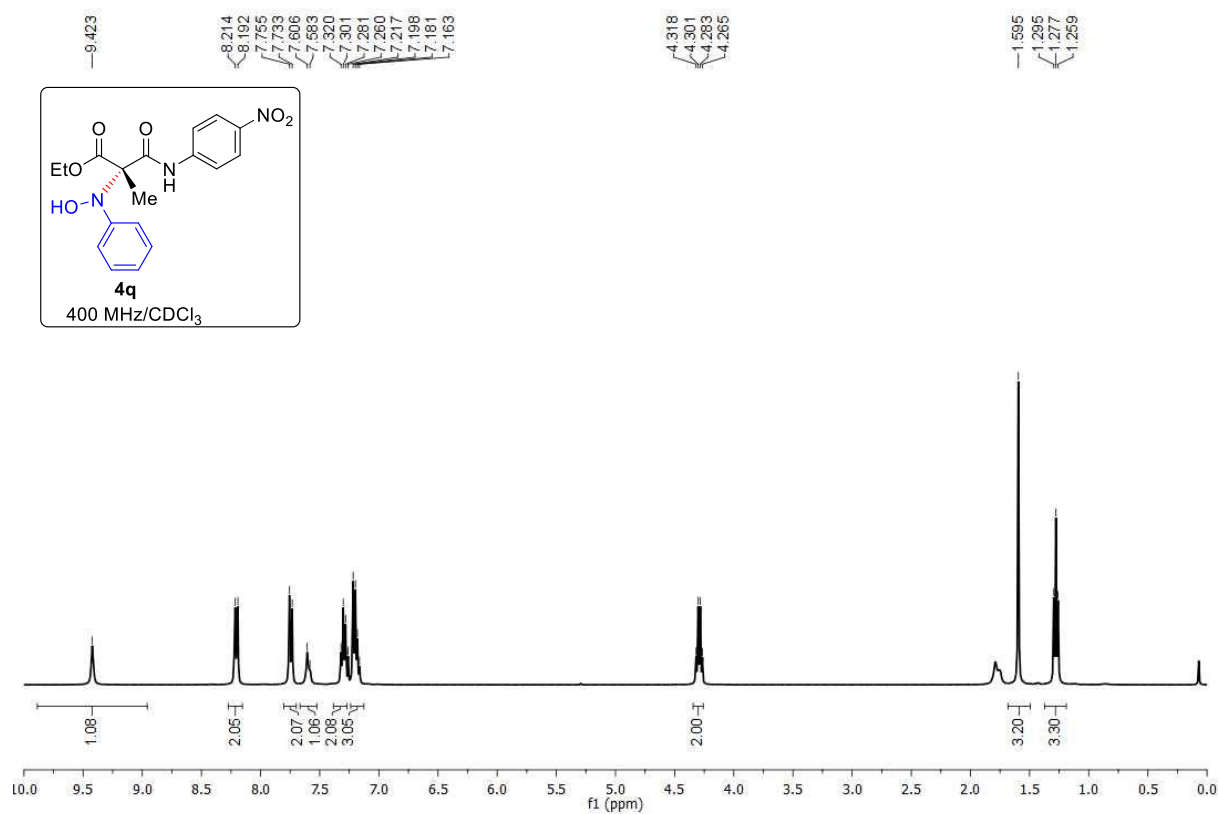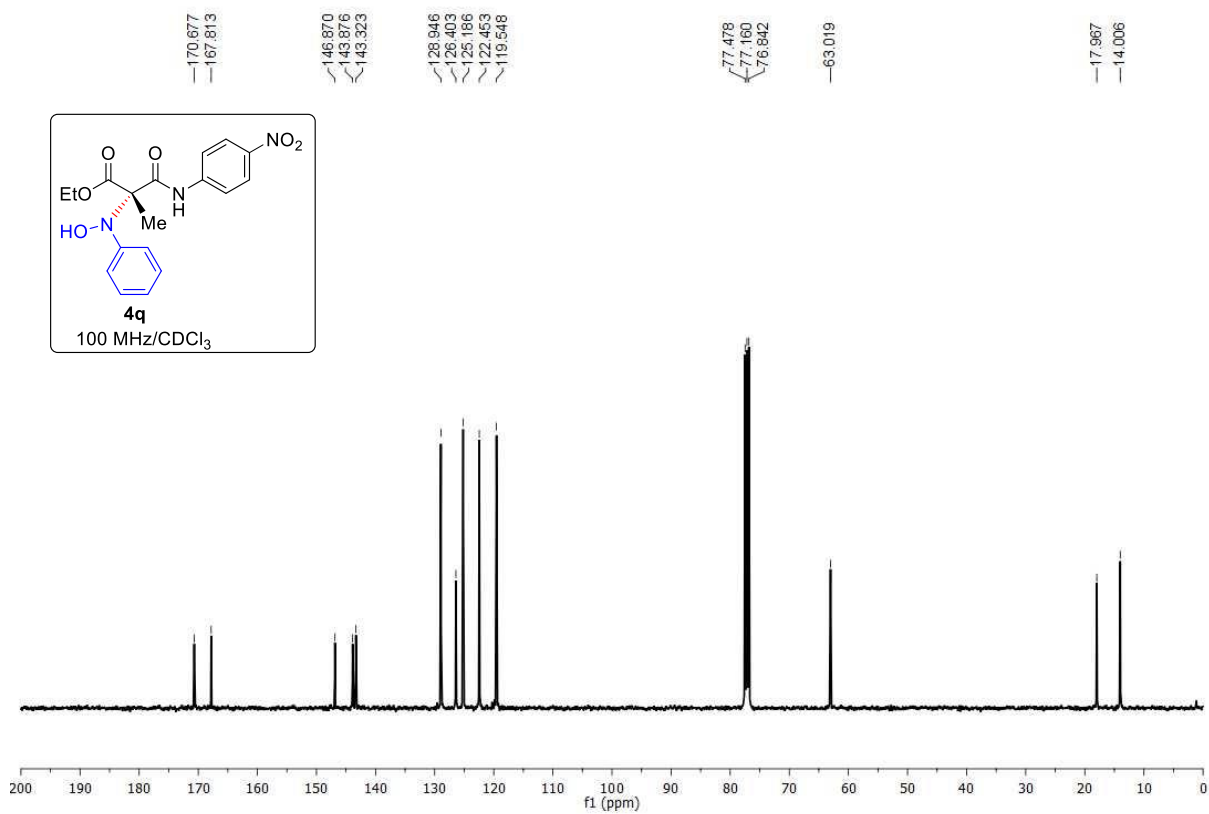

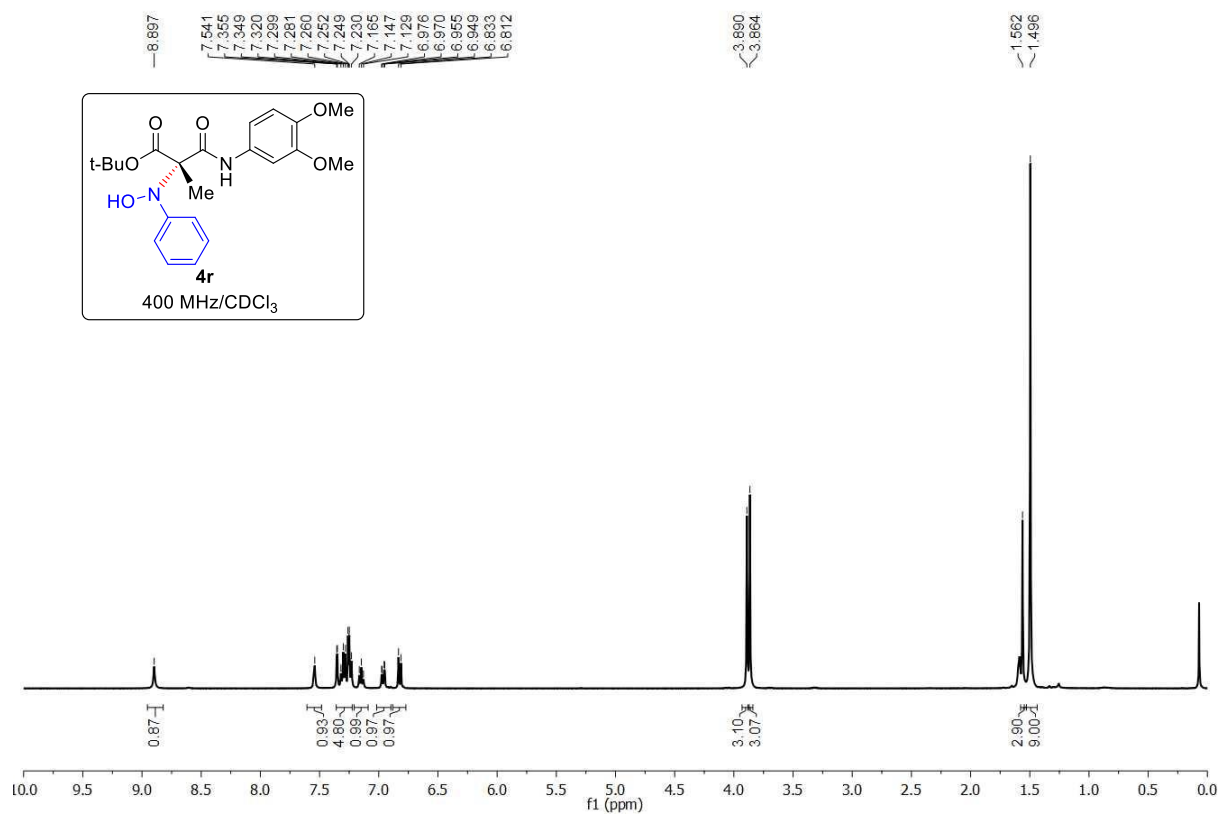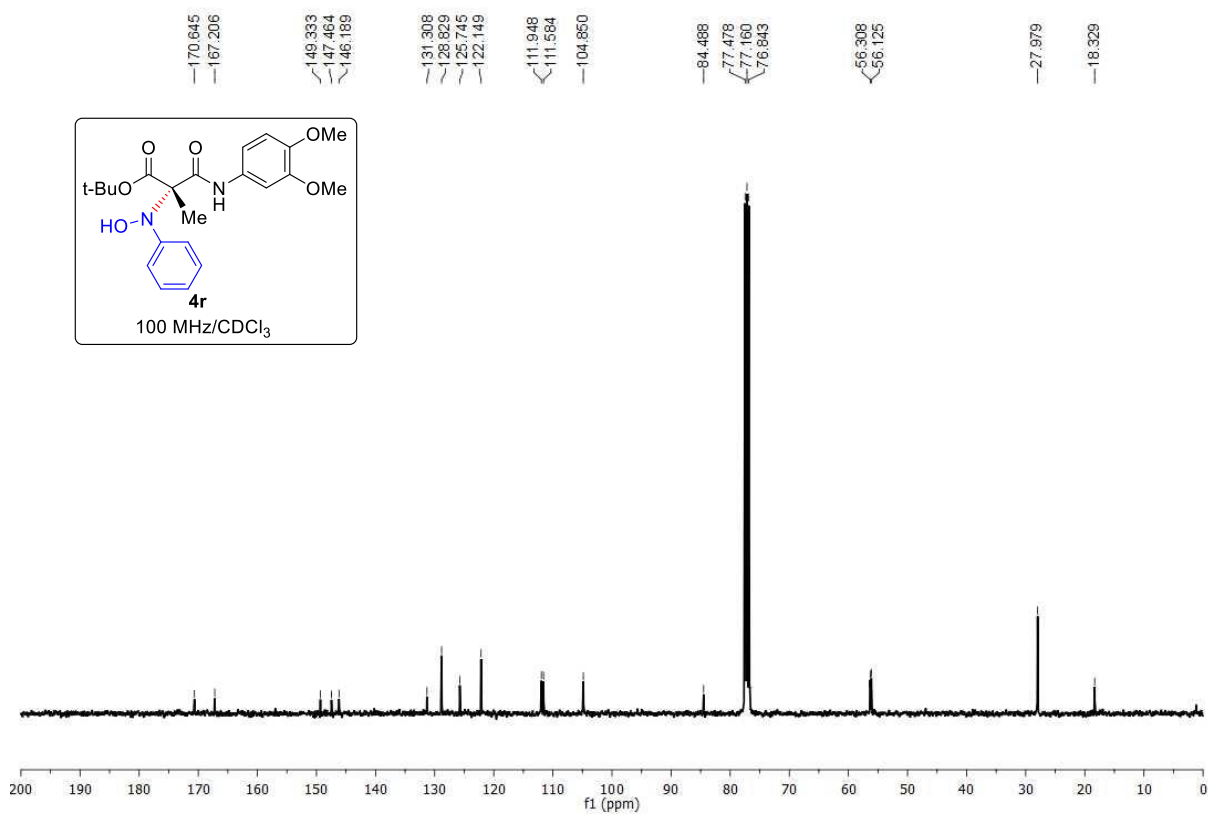

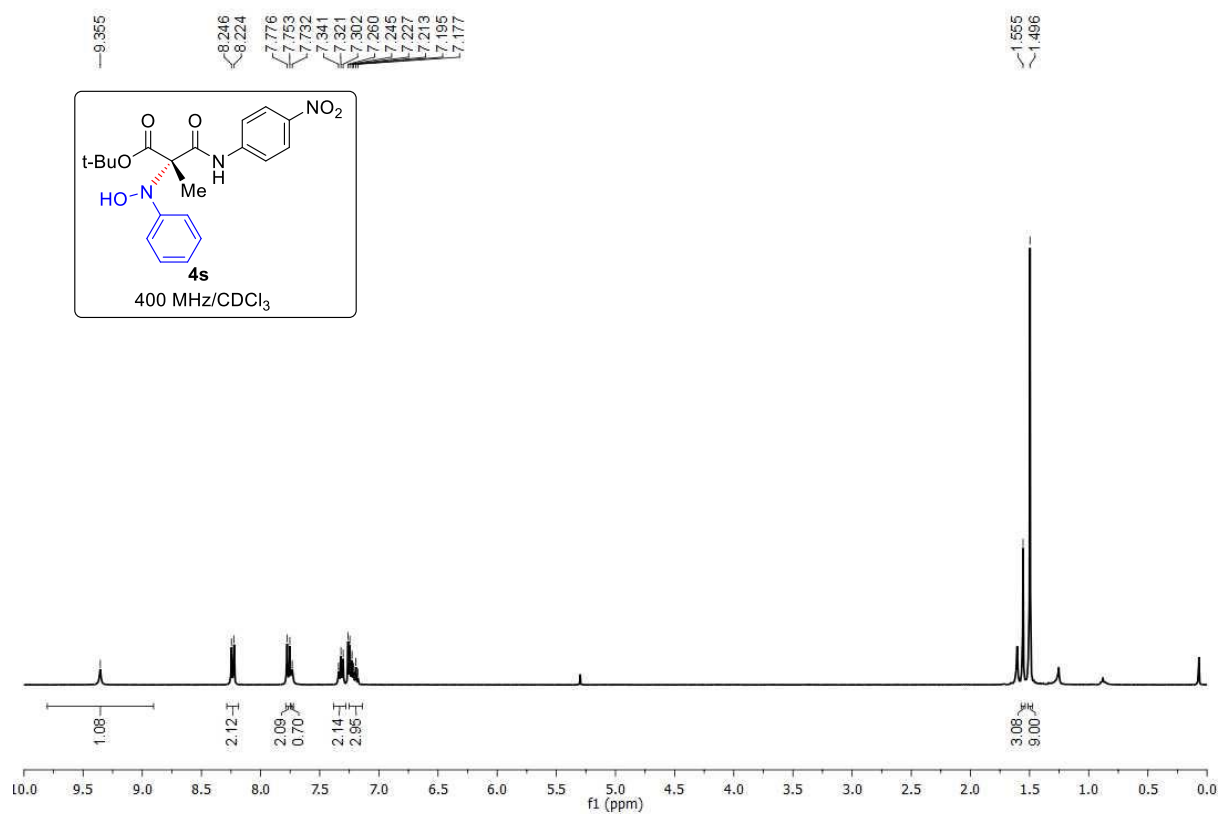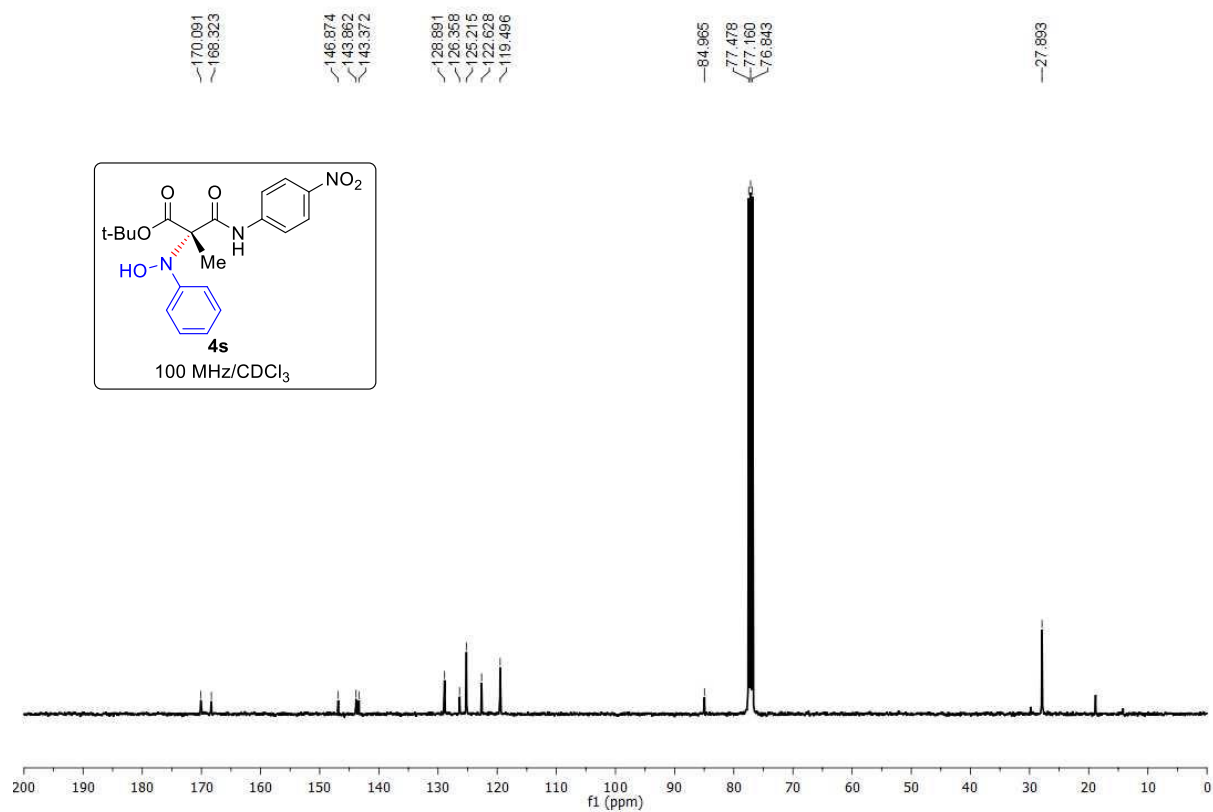

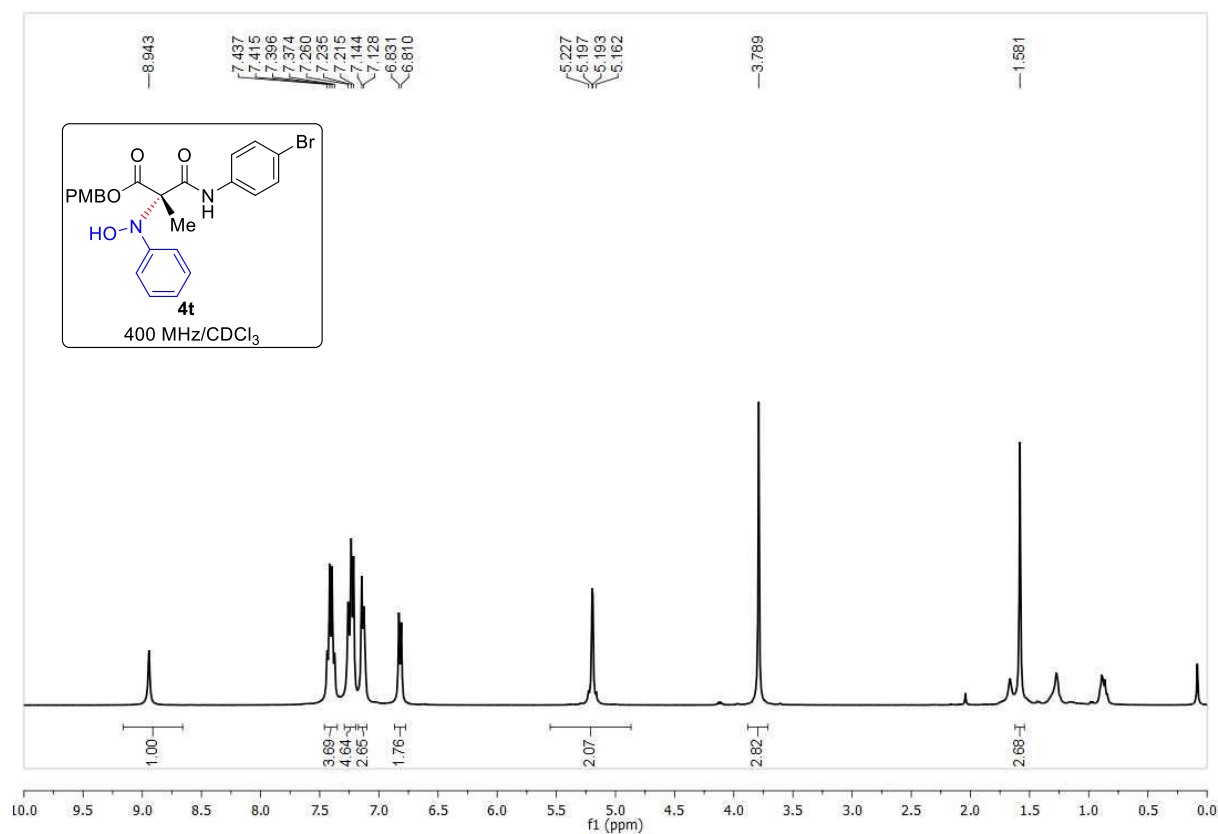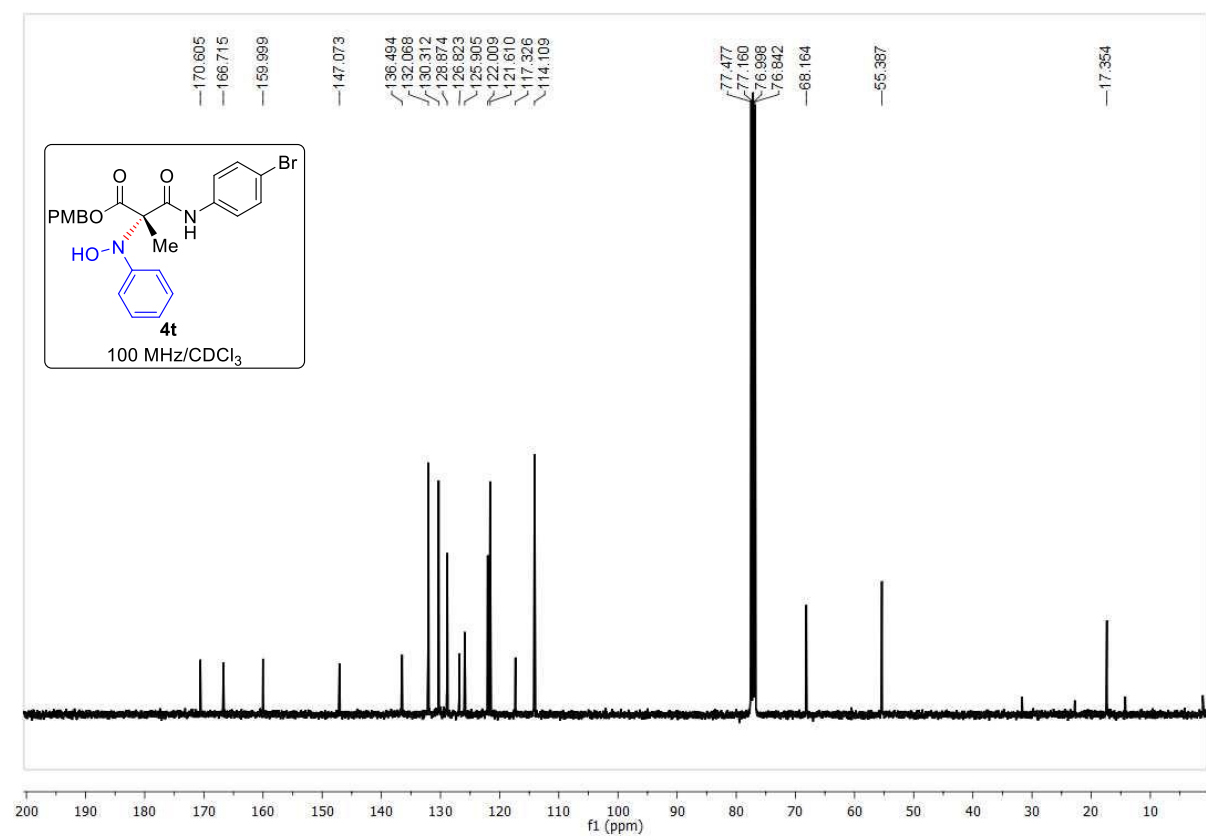

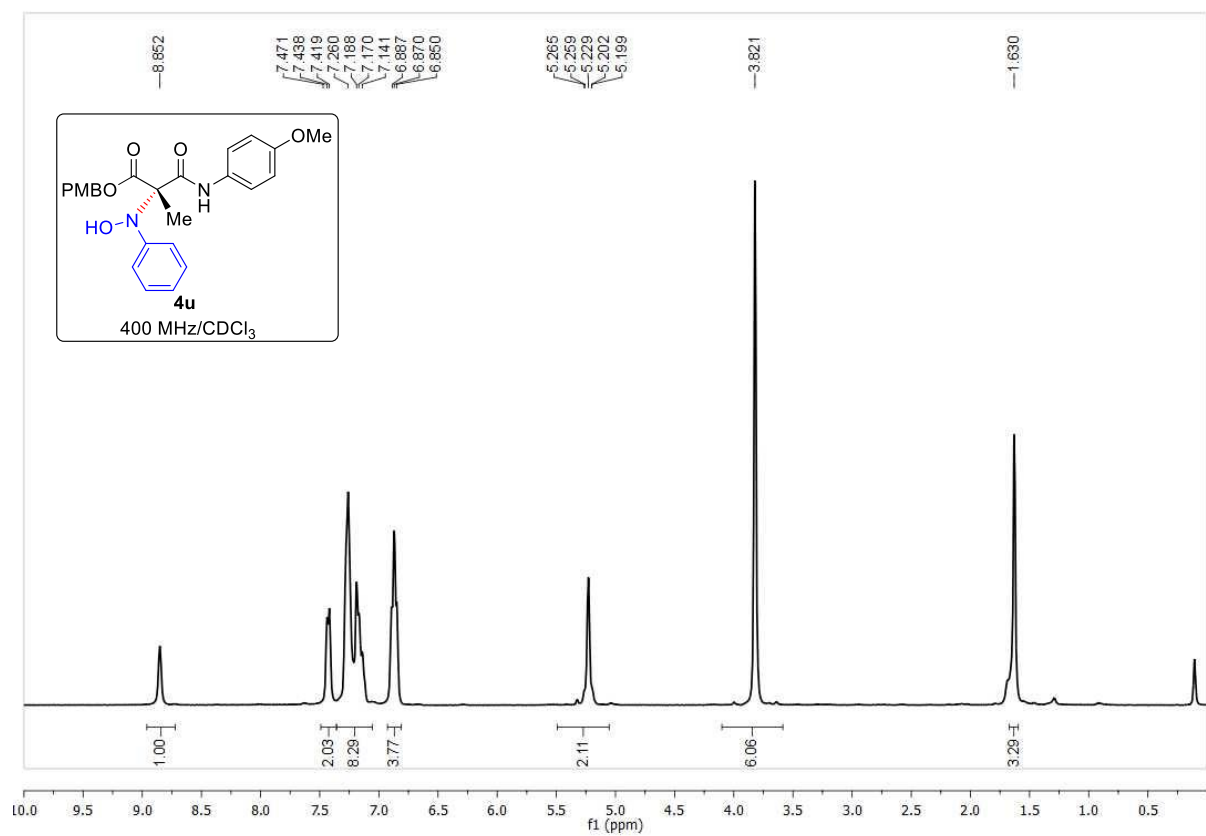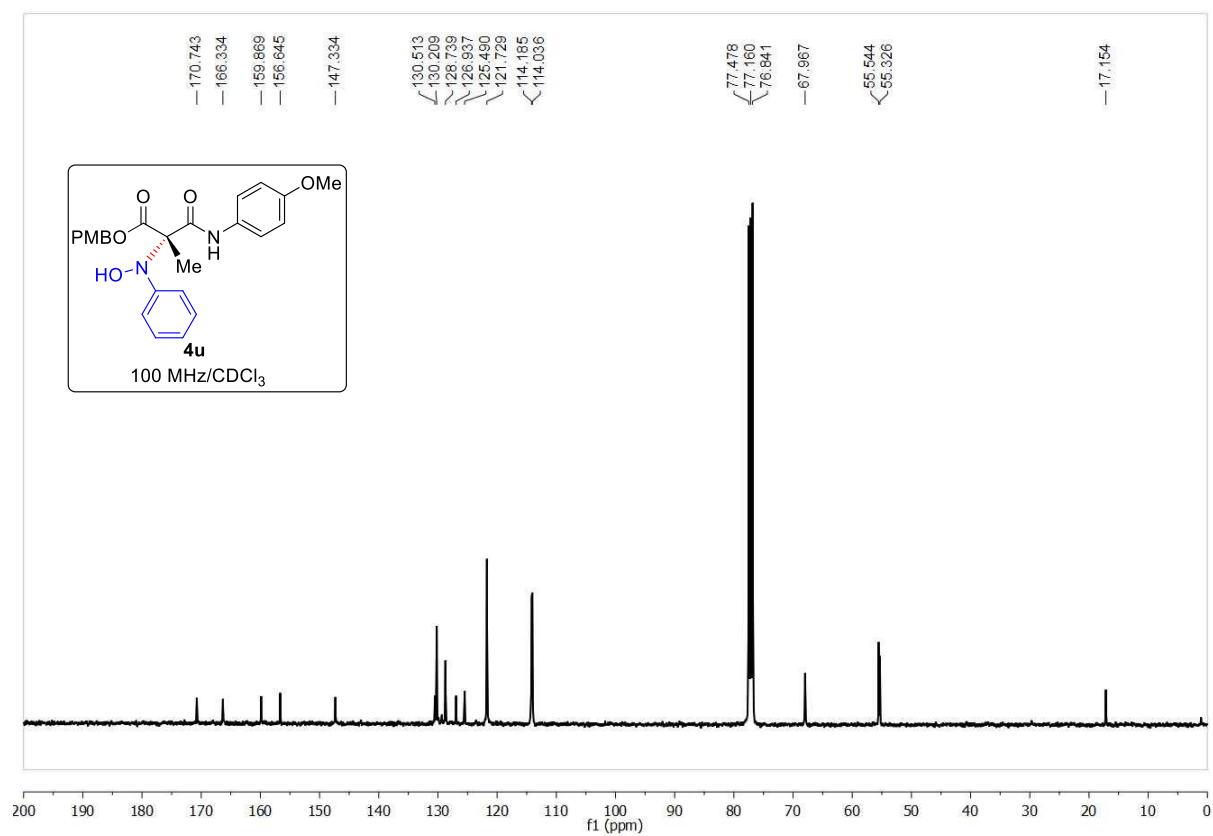

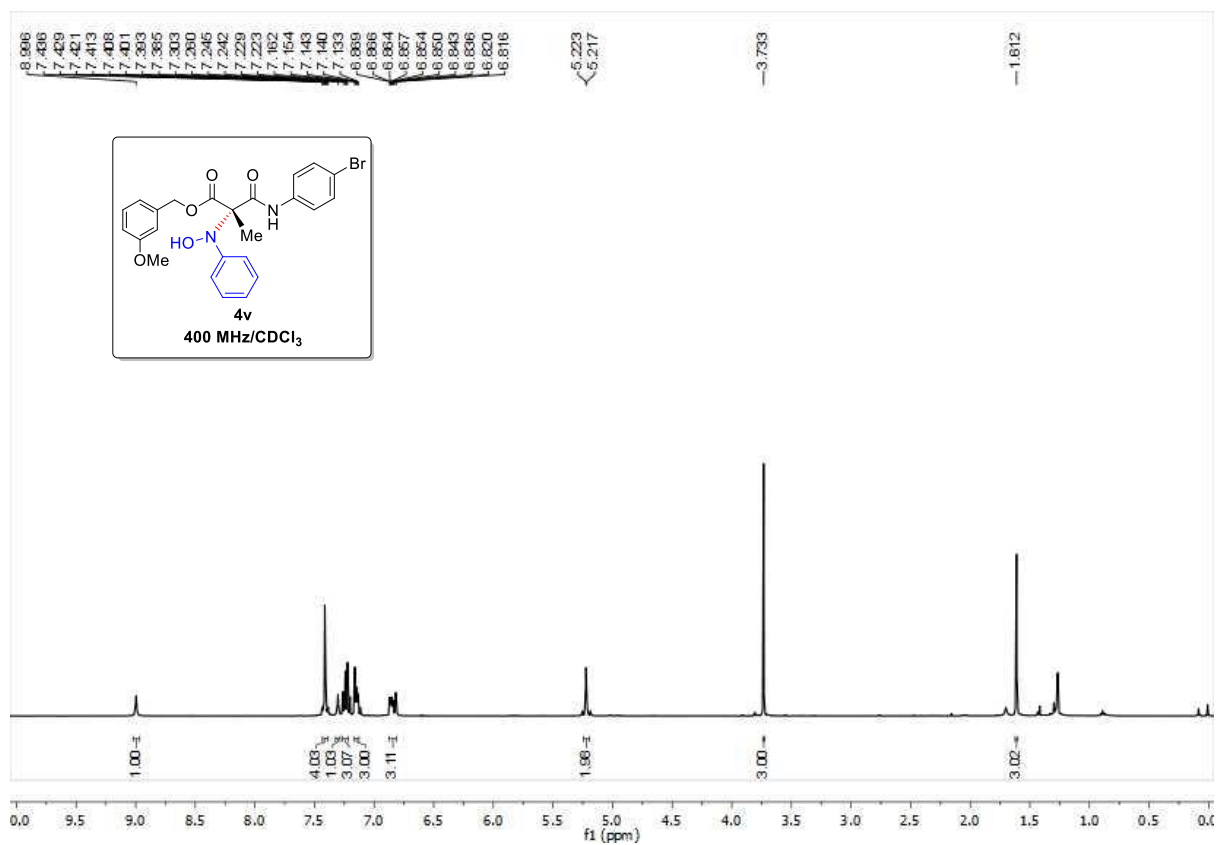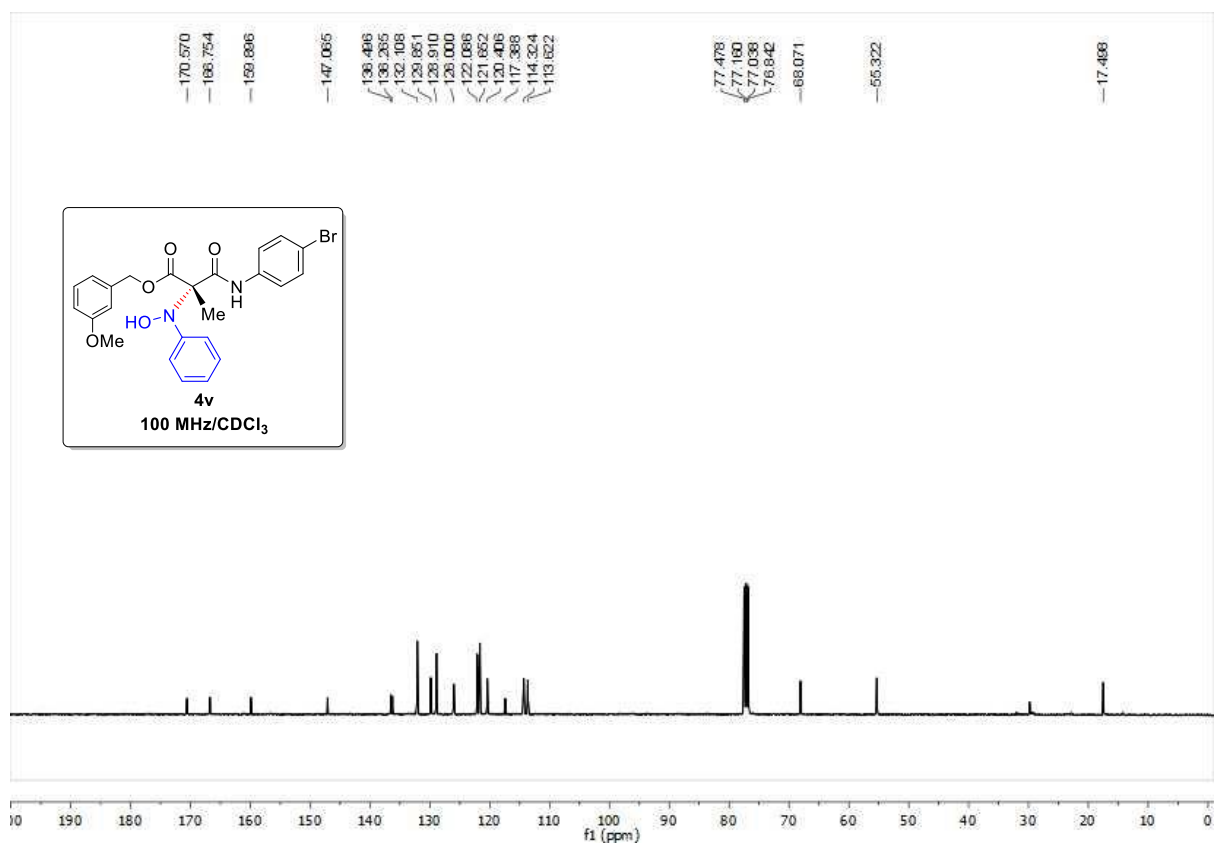



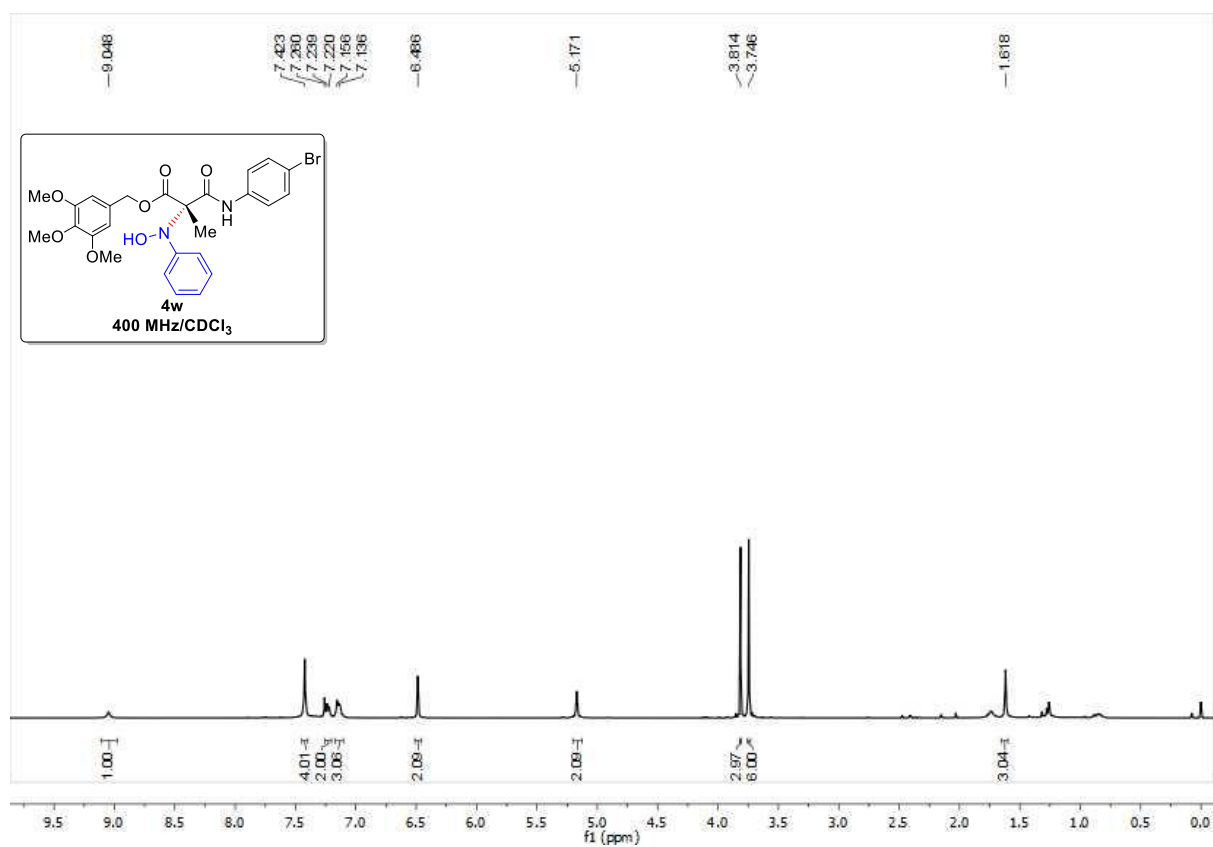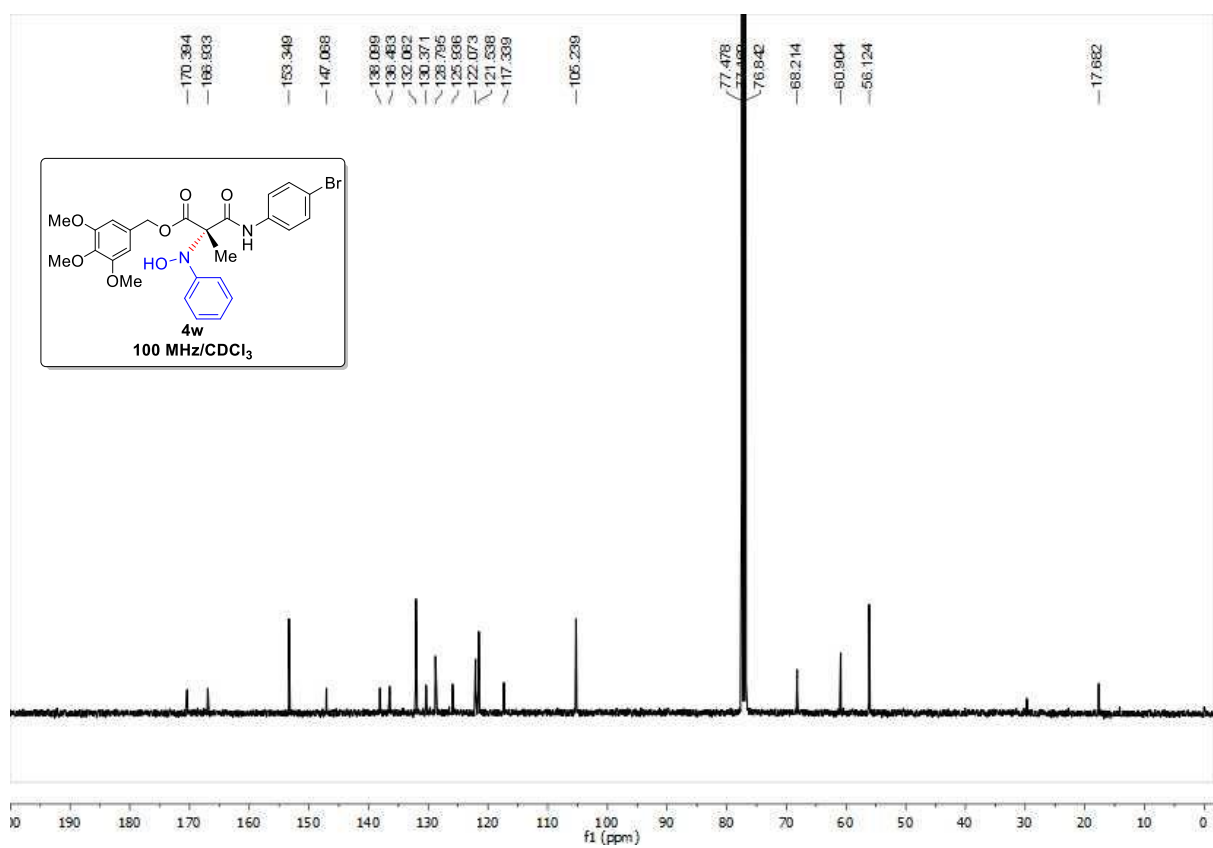

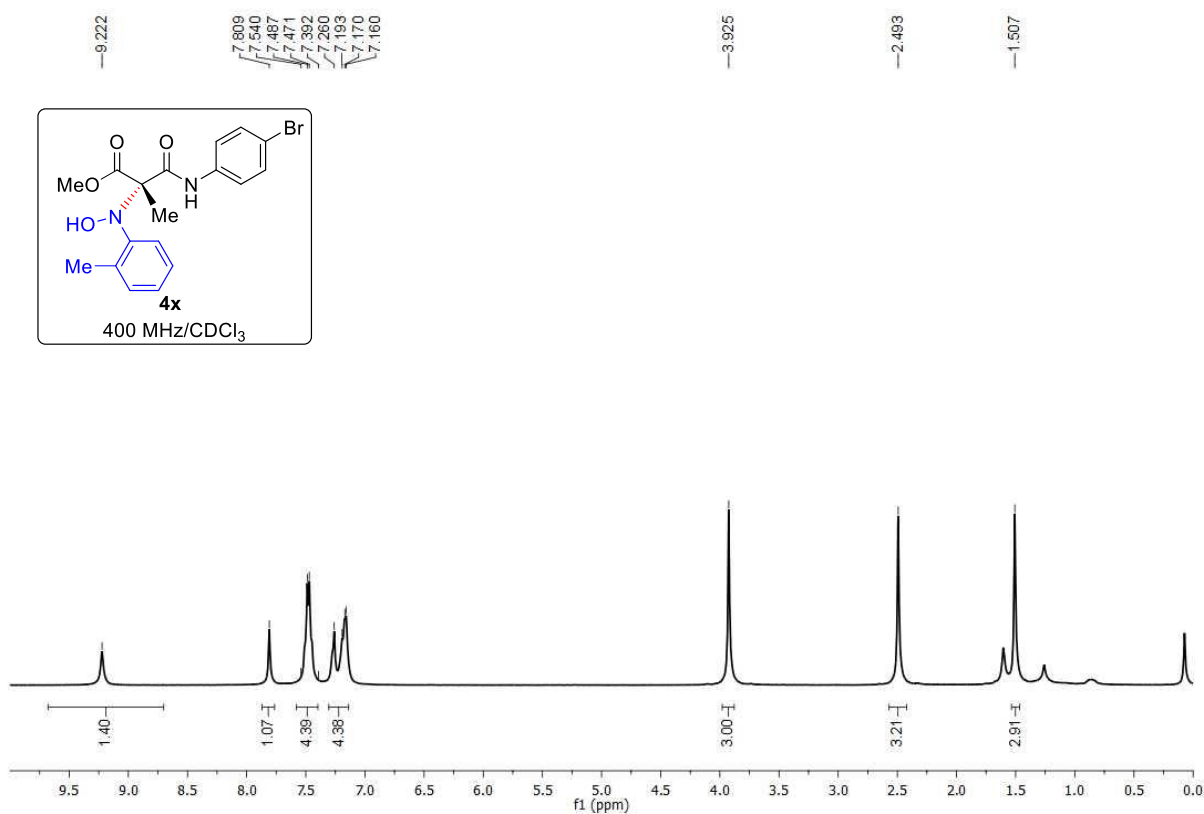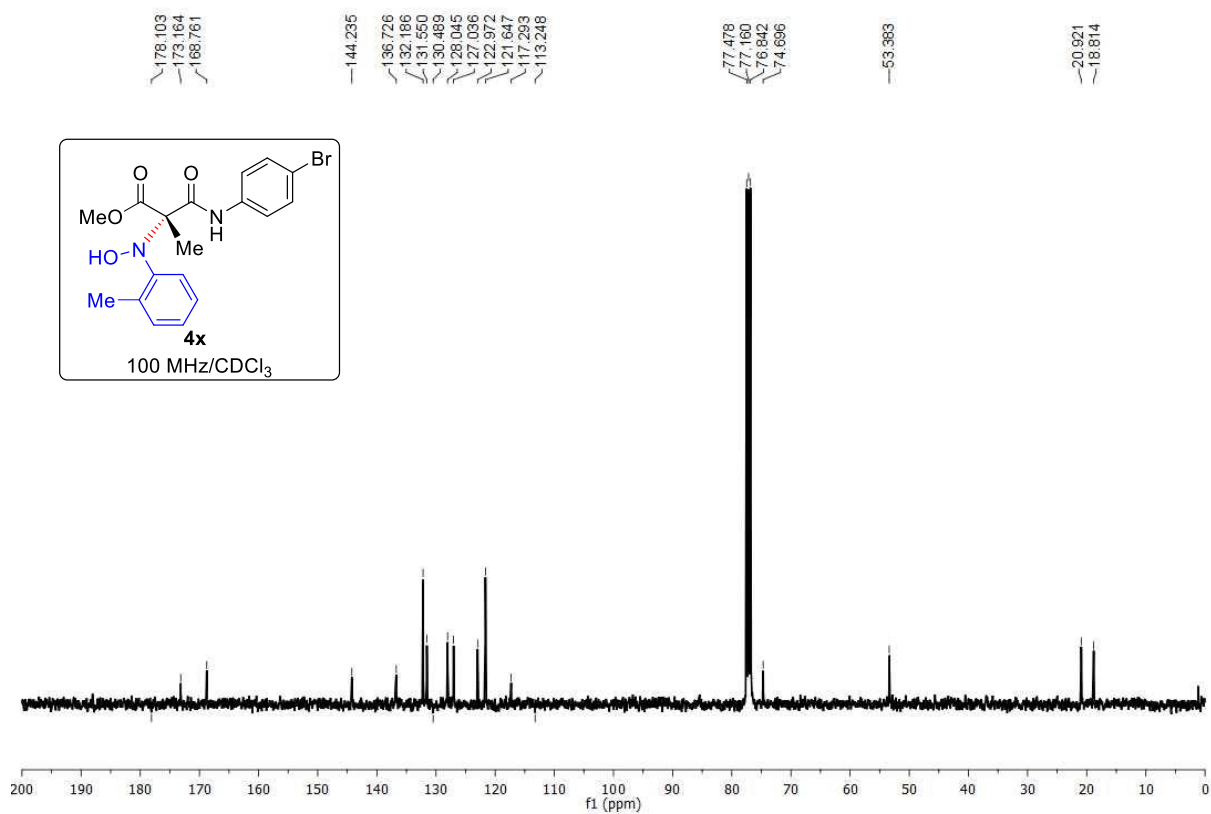

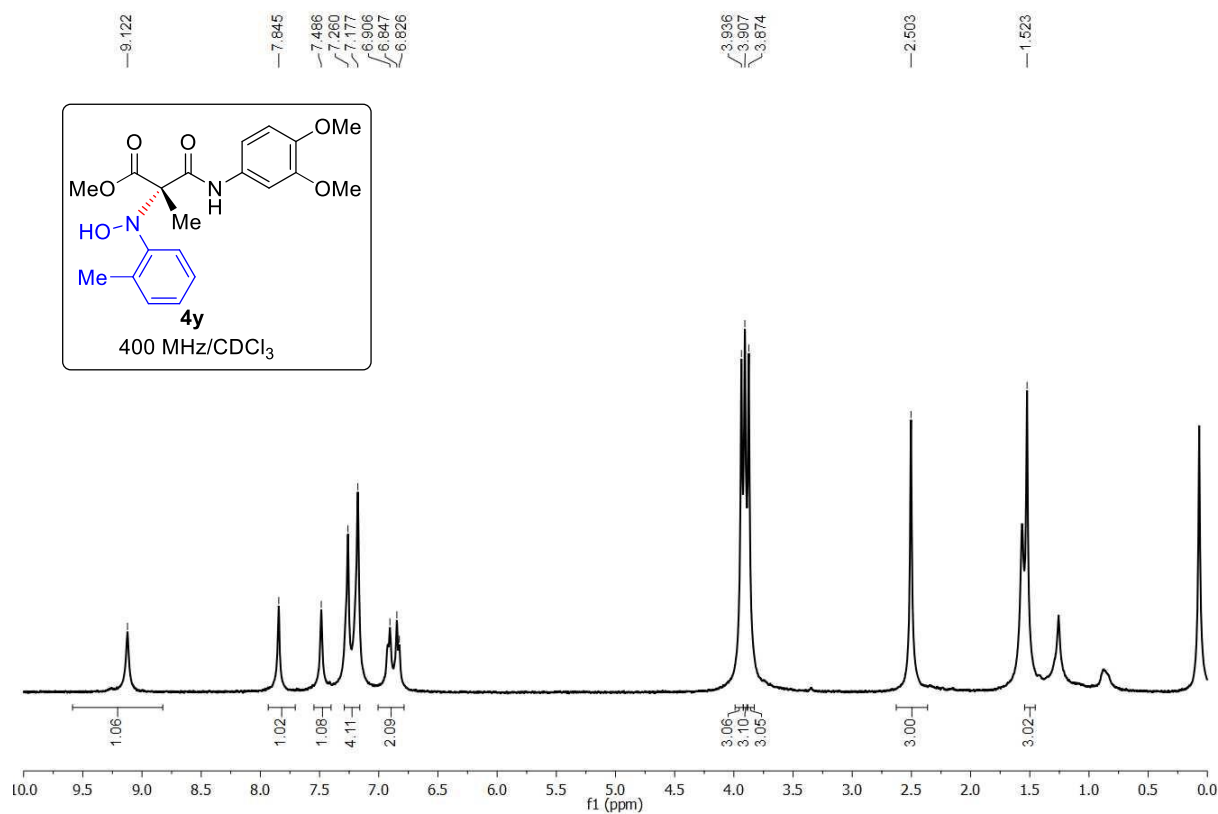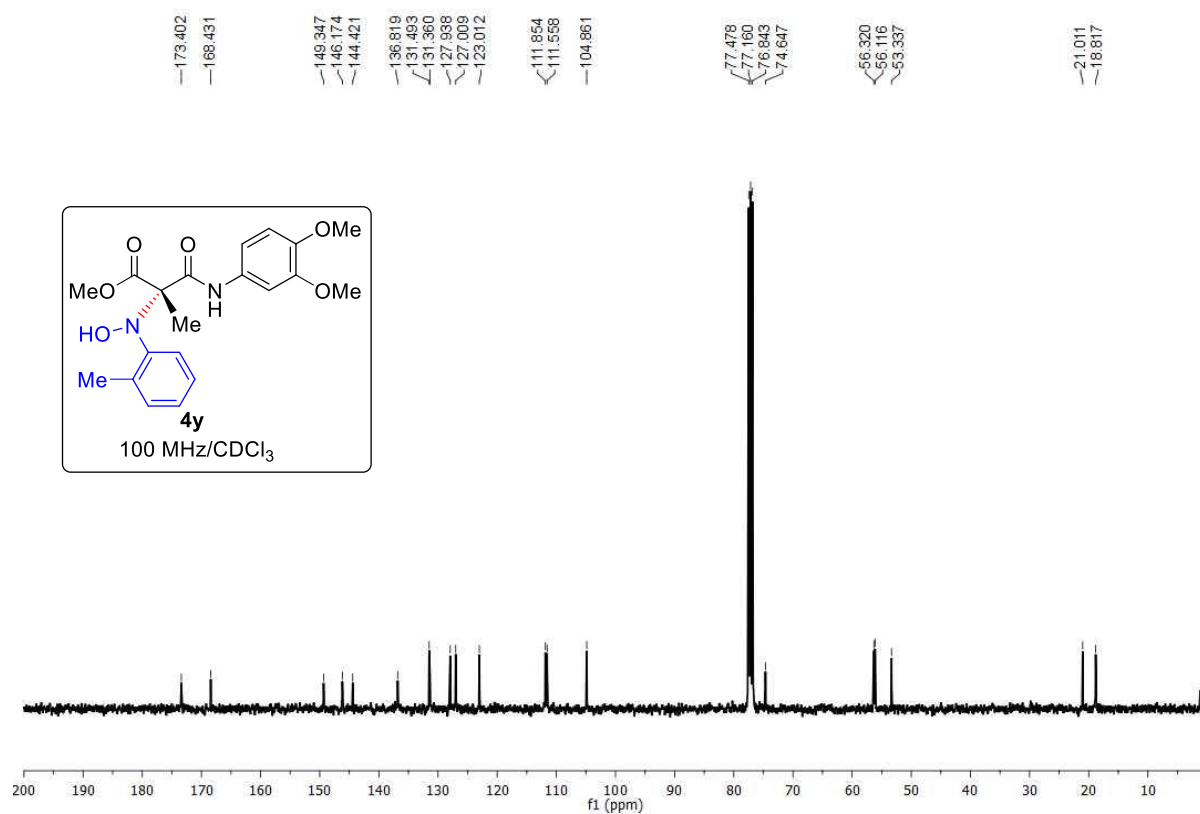

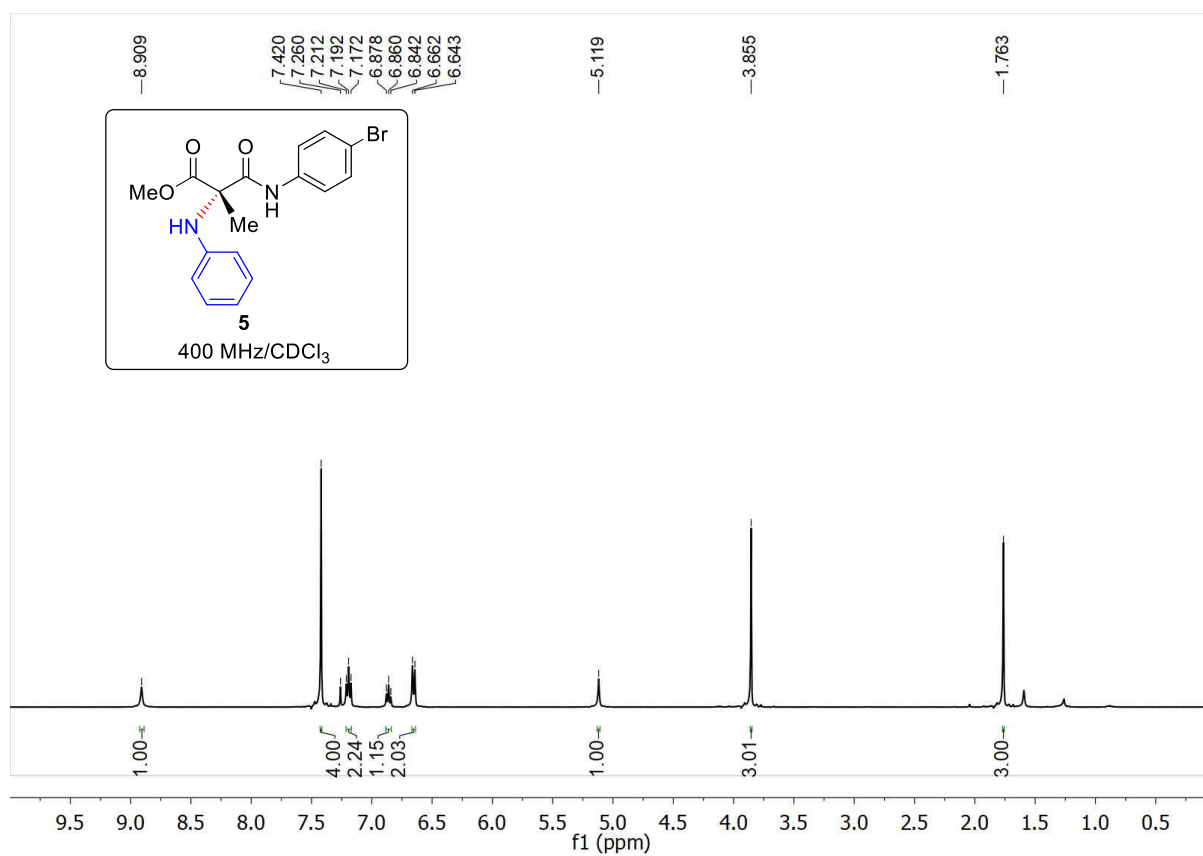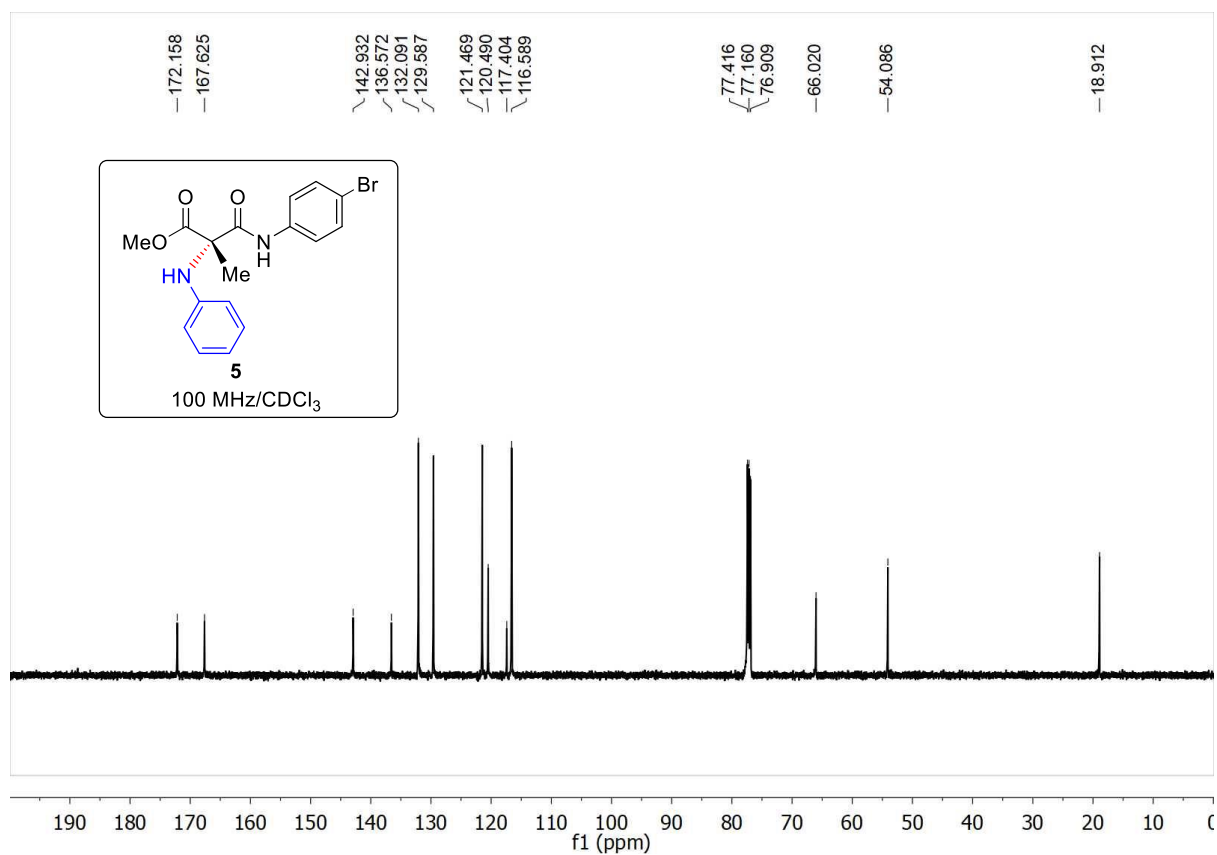

## HPLC chromatograms of all compounds

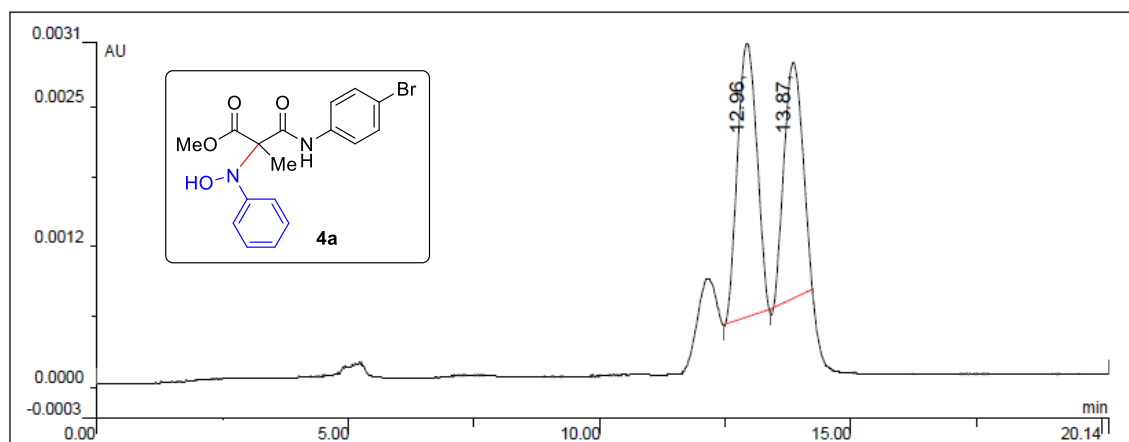

Area % Height %

| Sr. No. | Component Name | Ret. Time. | Area<br>μ volt sec | Height<br>μ volt | Area % | Height % | ID |   |
|---------|----------------|------------|--------------------|------------------|--------|----------|----|---|
| 1       |                | 12.96      | 33221.54           | 1217             | 54.82  | 53.65    | U  | M |
| 2       |                | 13.87      | 27374.23           | 1051             | 45.18  | 46.35    | U  | M |
|         |                |            | 60595.77           | 2268             | 100.00 | 100.00   |    |   |

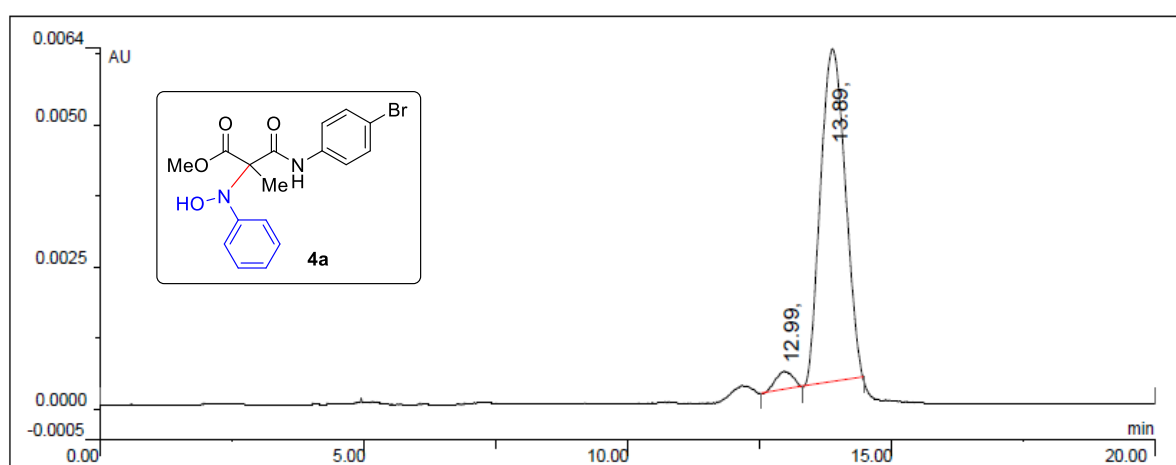

Area % Height %

| Sr. No. | Component Name | Ret. Time. | Area<br>μ volt sec | Height<br>μ volt | Area % | Height % | ID |   |
|---------|----------------|------------|--------------------|------------------|--------|----------|----|---|
| 1       |                | 12.99      | 3523.49            | 154              | 3.51   | 5.00     | U  | M |
| 2       |                | 13.89      | 96969.54           | 2931             | 96.49  | 95.00    | U  | M |
|         |                |            | 100493.03          | 3085             | 100.00 | 100.00   |    |   |

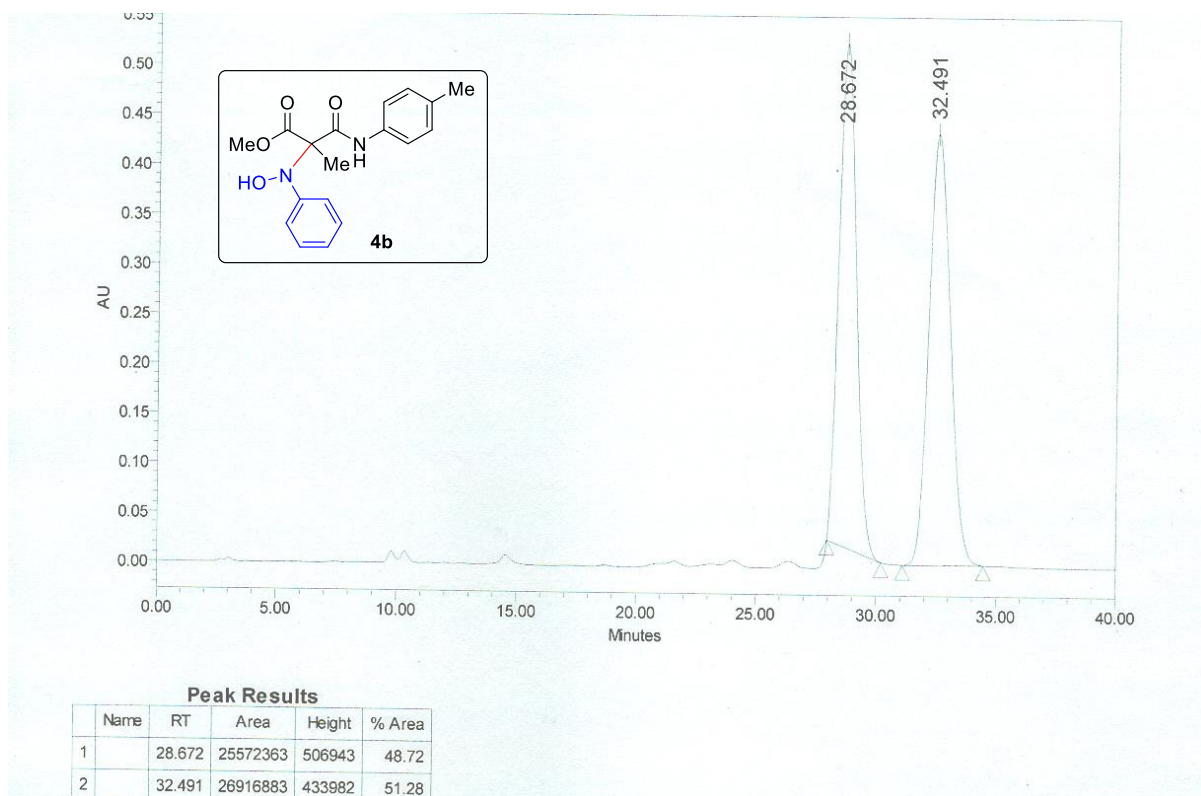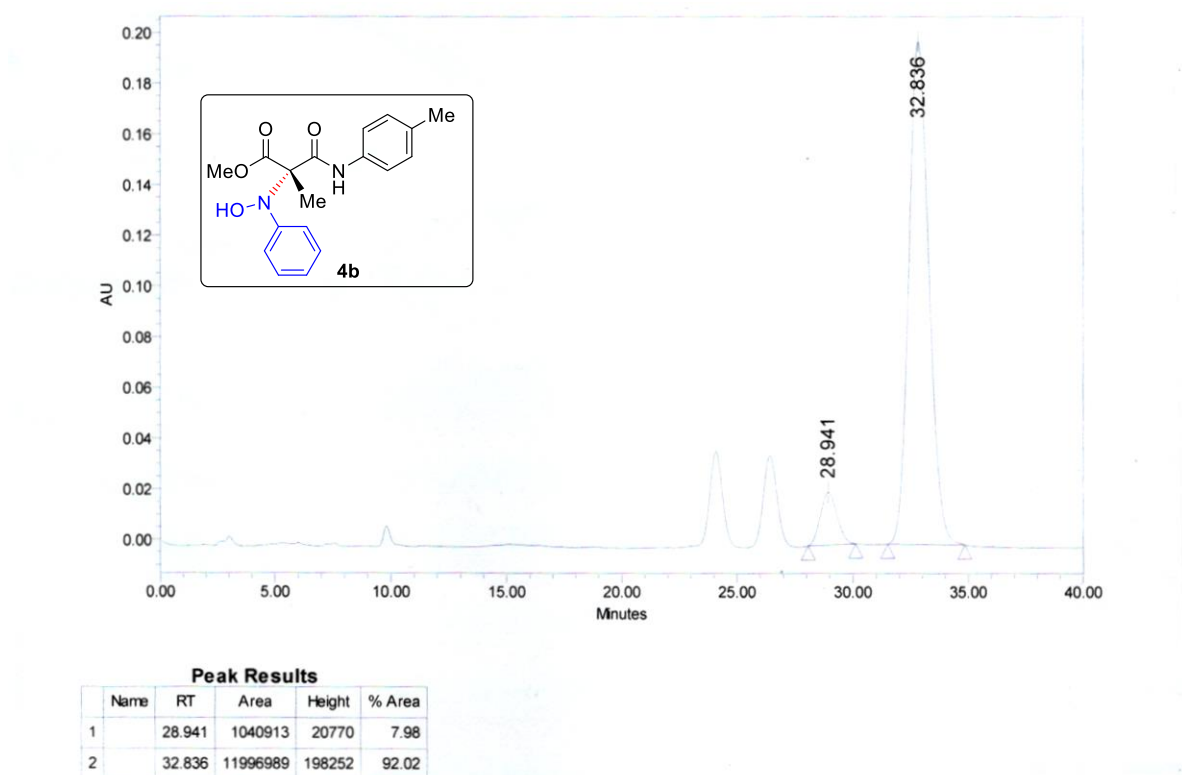

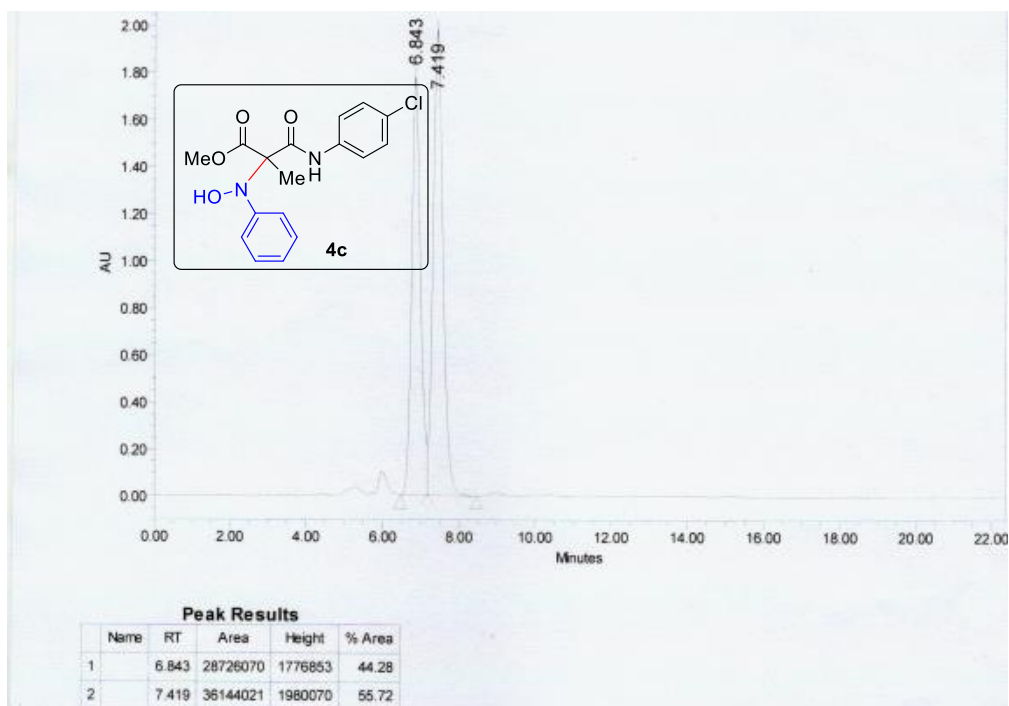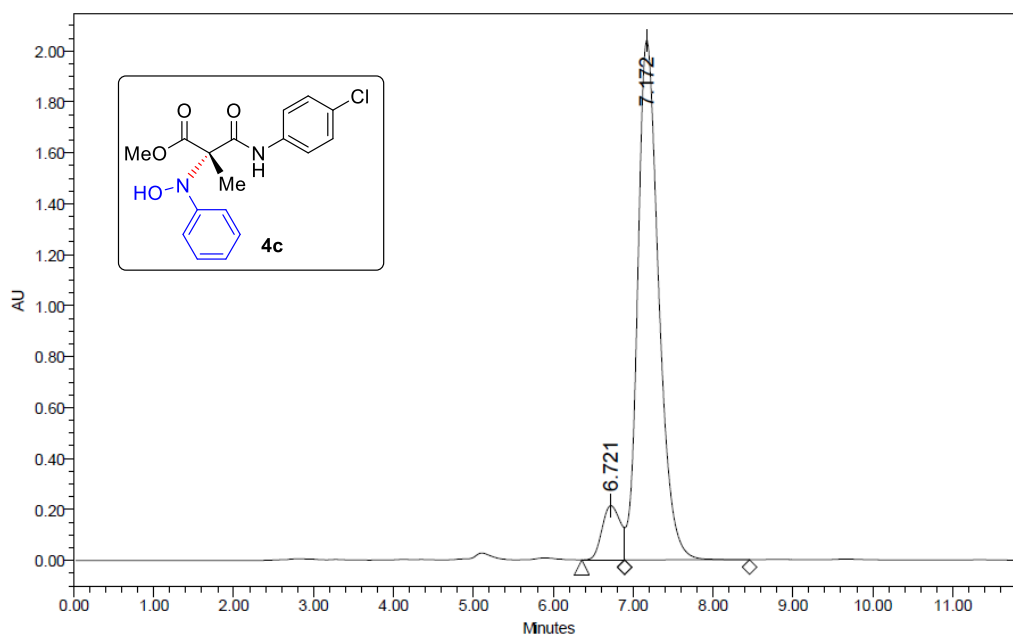

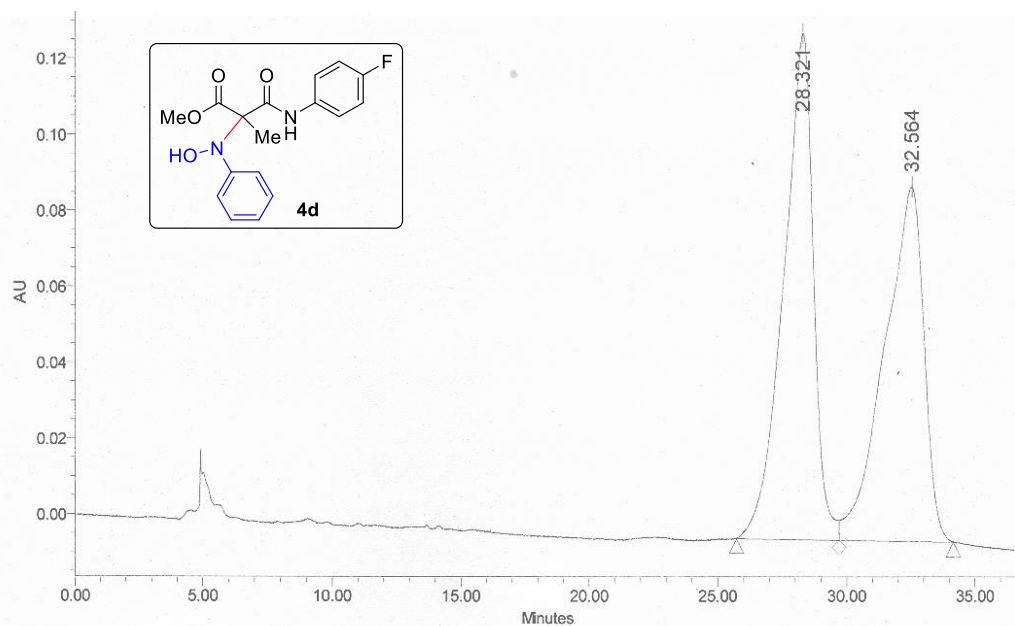

Peak Results

| Name | RT     | Area     | Height | % Area |
|------|--------|----------|--------|--------|
| 1    | 28.321 | 10707784 | 133335 | 51.62  |
| 2    | 32.564 | 10036241 | 93421  | 48.38  |

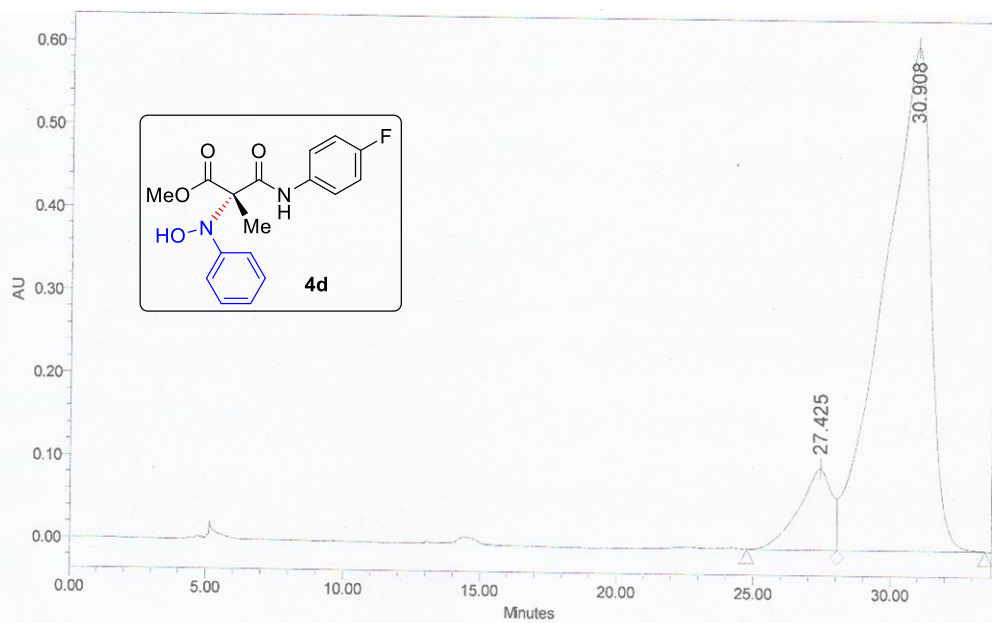

Peak Results

| Name | RT     | Area     | Height | % Area |
|------|--------|----------|--------|--------|
| 1    | 27.425 | 8325398  | 98863  | 10.37  |
| 2    | 30.908 | 71947422 | 608787 | 89.63  |



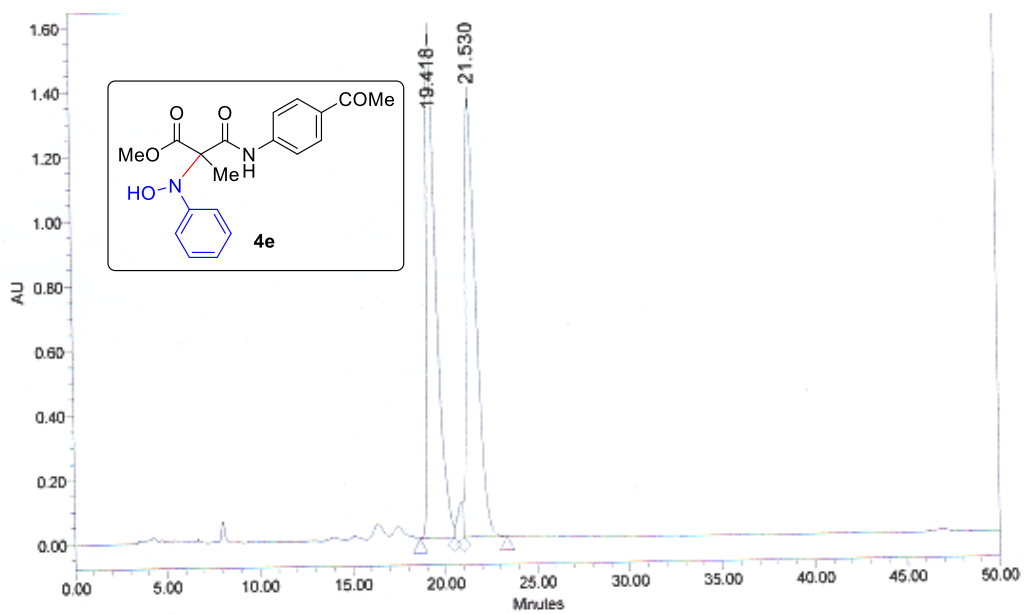

Peak Results

| Name | RT     | Area     | Height  | % Area |
|------|--------|----------|---------|--------|
| 1    | 19.418 | 56292755 | 1563268 | 51.24  |
| 2    | 21.530 | 53565300 | 1356806 | 48.76  |

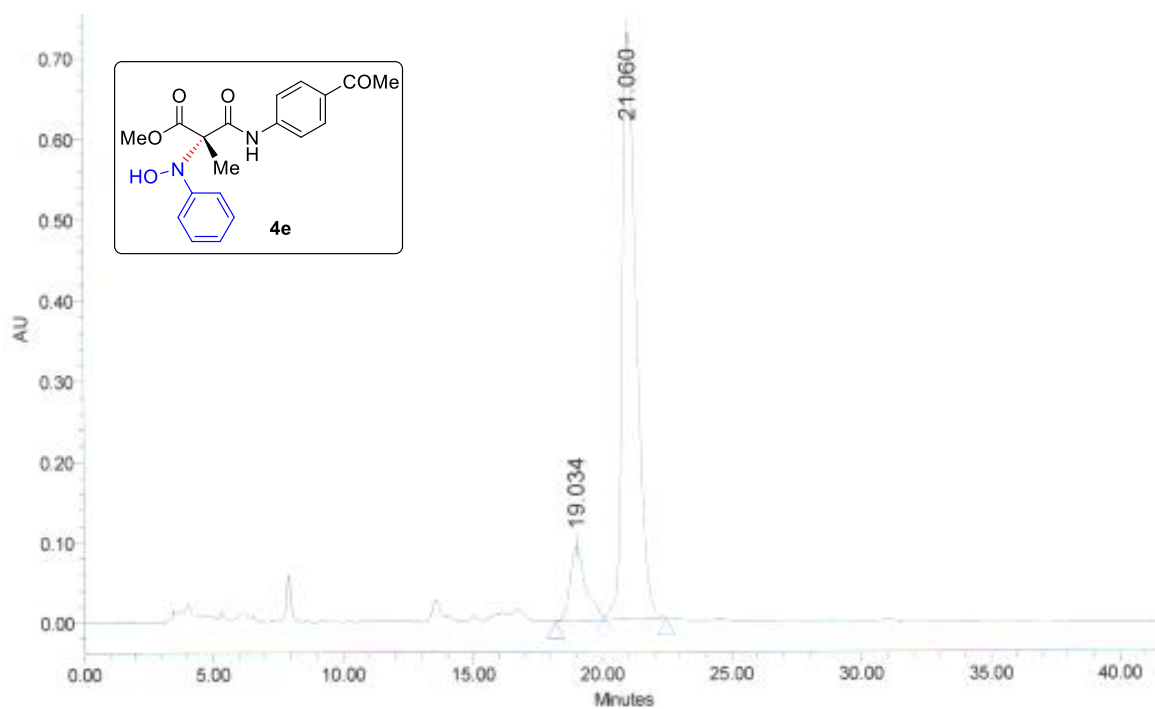

Peak Results

| Name | RT     | Area     | Height | % Area |
|------|--------|----------|--------|--------|
| 1    | 19.034 | 3993166  | 93706  | 12.64  |
| 2    | 21.060 | 27595420 | 729079 | 87.36  |

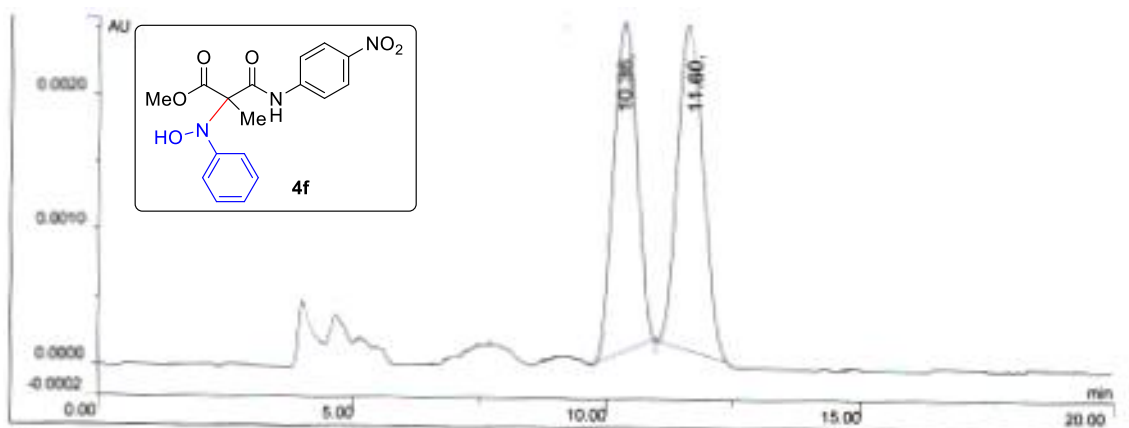

#### Area % Height %

| Sr. No. | Component Name | Ret. Time. | Area $\mu$ volt sec | Height $\mu$ volt | Area % | Height % | ID |   |
|---------|----------------|------------|---------------------|-------------------|--------|----------|----|---|
| 1       |                | 10.36      | 39617.03            | 1217              | 47.63  | 50.24    | U  | M |
| 2       |                | 11.60      | 43557.03            | 1205              | 52.37  | 49.76    | U  | M |
|         |                |            | 83174.06            | 2422              | 100.00 | 100.00   |    |   |

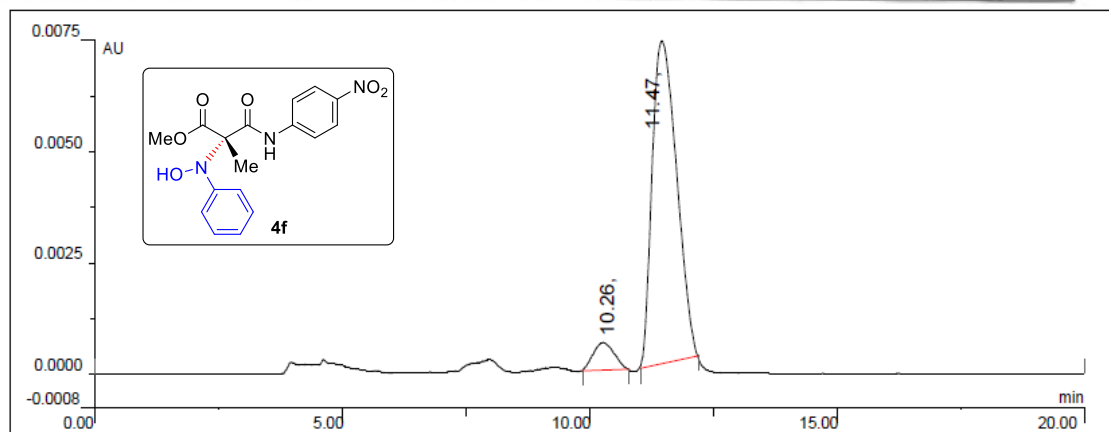

#### Area % Height %

| Sr. No. | Component Name | Ret. Time. | Area $\mu$ volt sec | Height $\mu$ volt | Area % | Height % | ID |   |
|---------|----------------|------------|---------------------|-------------------|--------|----------|----|---|
| 1       |                | 10.26      | 9392.74             | 308               | 6.87   | 7.80     | U  | M |
| 2       |                | 11.47      | 127287.94           | 3645              | 93.13  | 92.20    | U  | M |
|         |                |            | 136680.69           | 3954              | 100.00 | 100.00   |    |   |

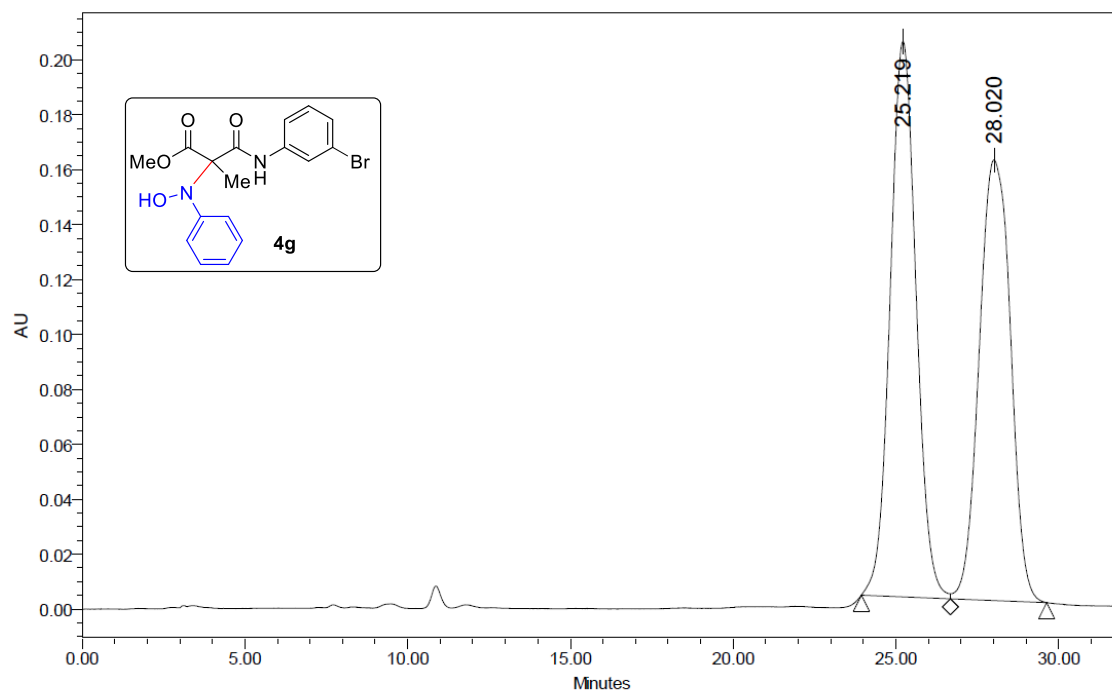

#### Peak Results

|   | Name | RT     | Area     | Height | % Area |
|---|------|--------|----------|--------|--------|
| 1 |      | 25.219 | 11204993 | 202204 | 51.05  |
| 2 |      | 28.020 | 10745283 | 160409 | 48.95  |

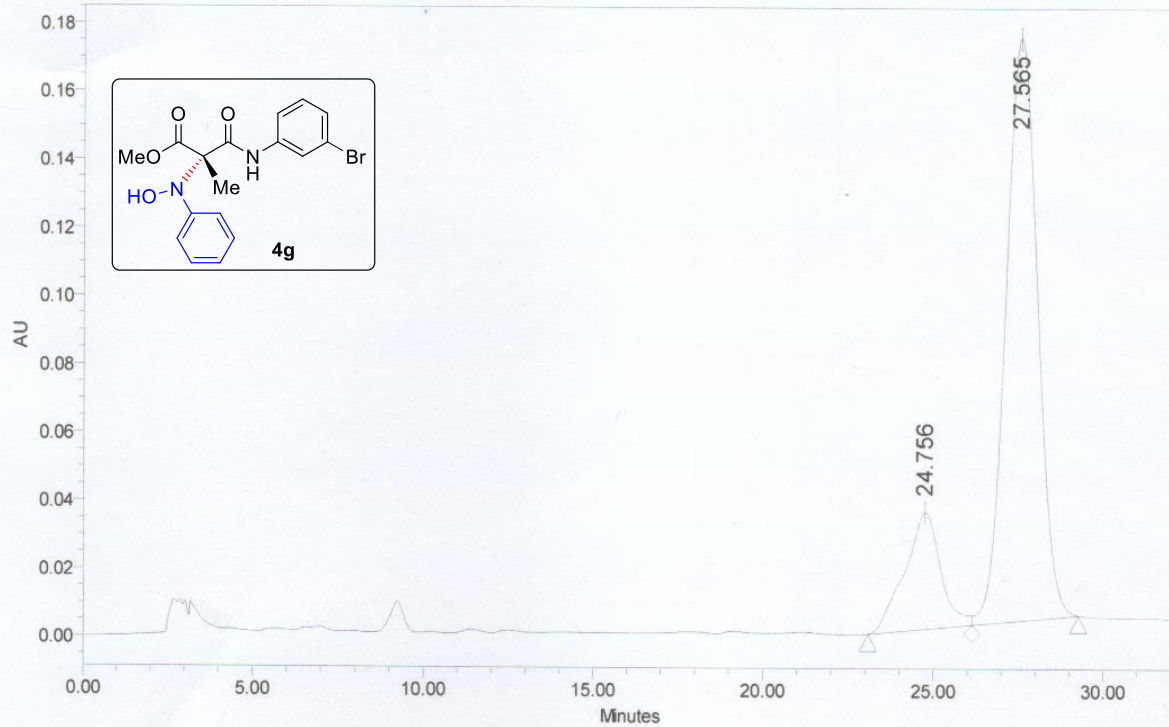

#### Peak Results

|   | Name | RT     | Area     | Height | % Area |
|---|------|--------|----------|--------|--------|
| 1 |      | 24.756 | 2533821  | 34327  | 18.48  |
| 2 |      | 27.565 | 11180672 | 170961 | 81.52  |

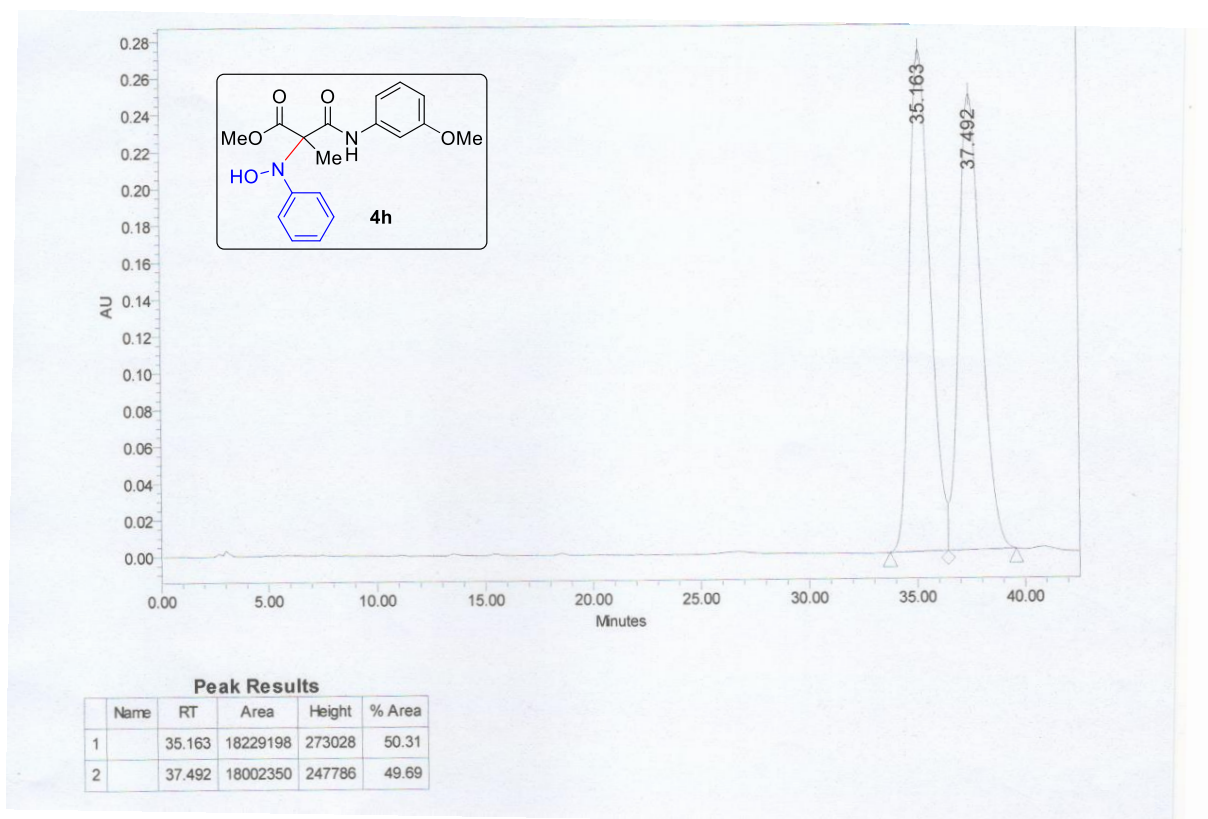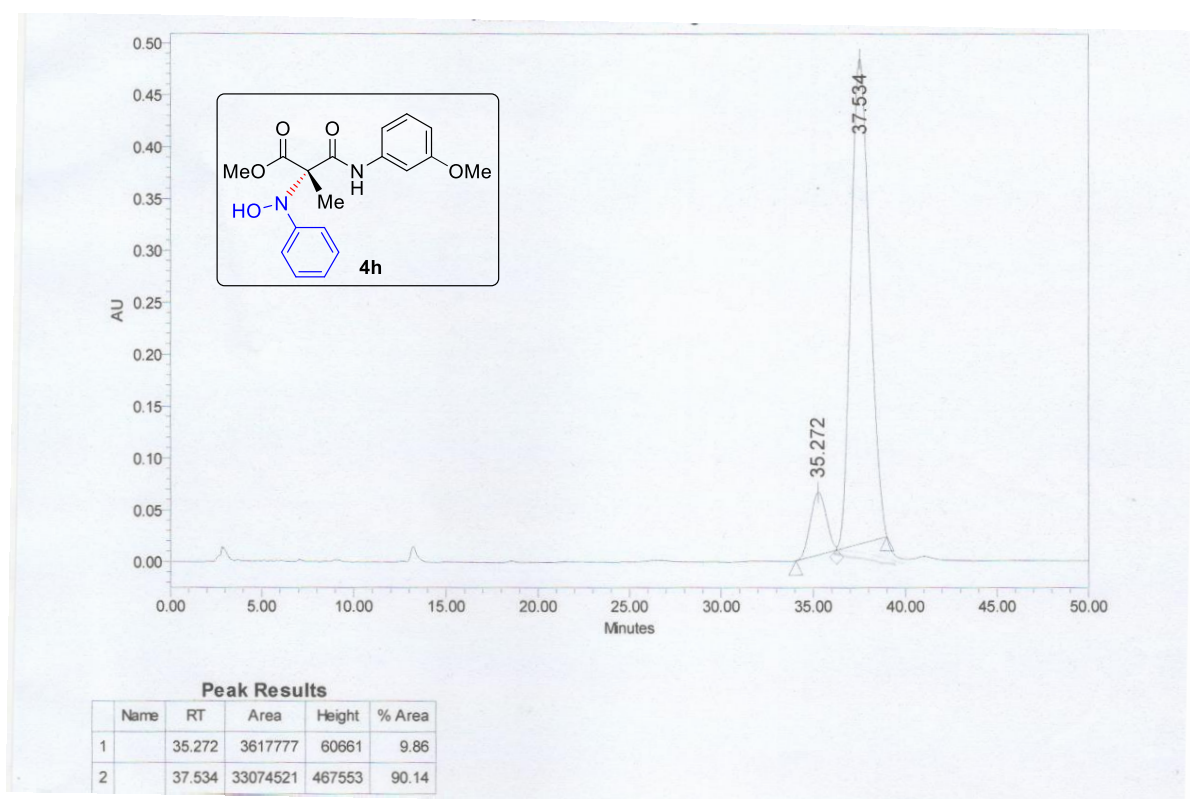

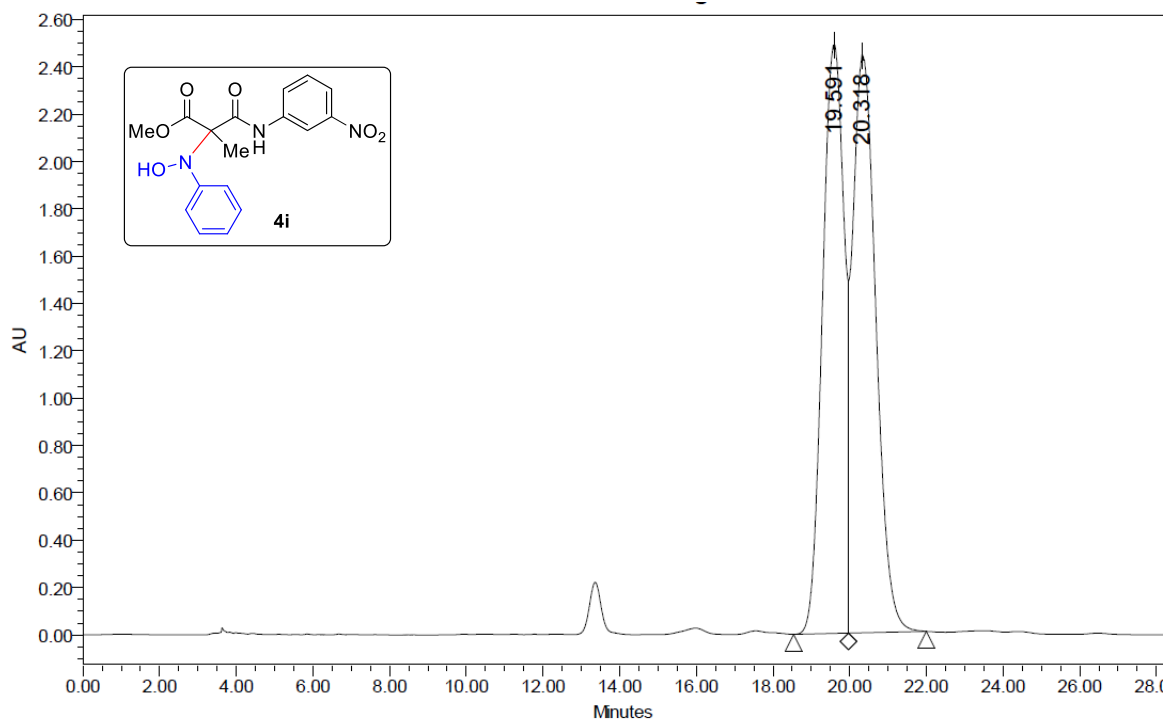

#### Peak Results

|   | Name | RT     | Area      | Height  | % Area |
|---|------|--------|-----------|---------|--------|
| 1 |      | 19.591 | 97163026  | 2485510 | 48.41  |
| 2 |      | 20.318 | 103542518 | 2438182 | 51.59  |

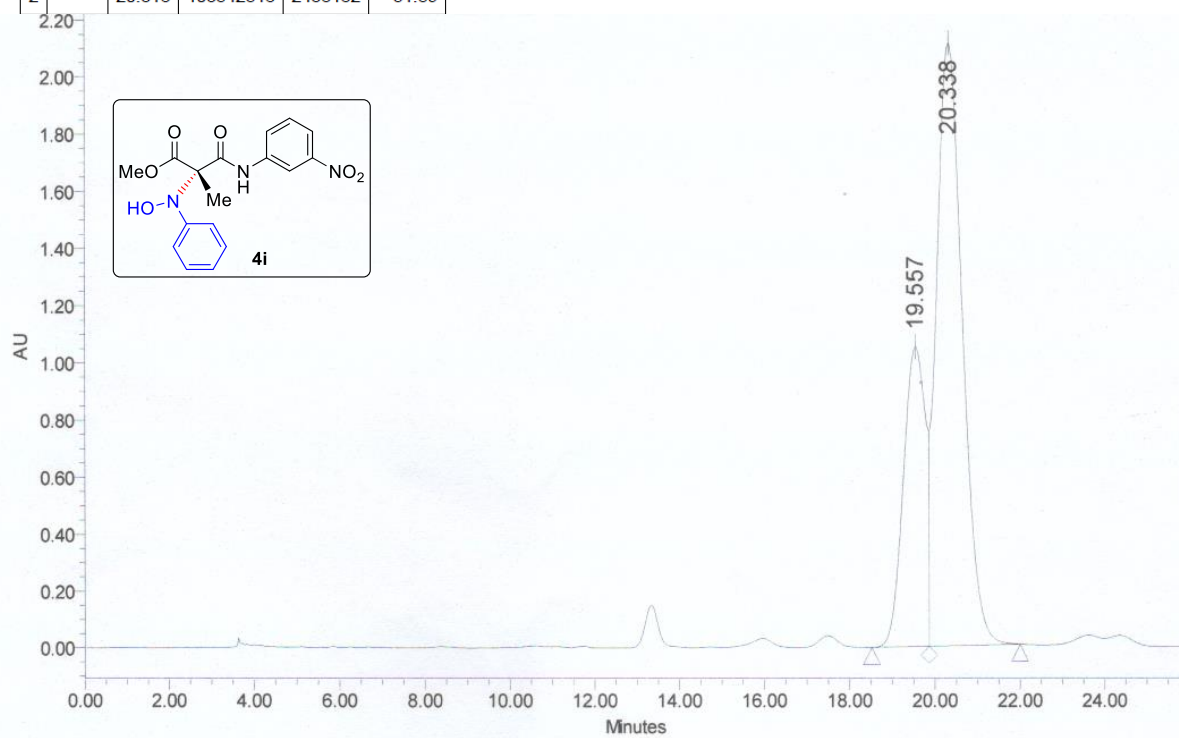

#### Peak Results

|   | Name | RT     | Area     | Height  | % Area |
|---|------|--------|----------|---------|--------|
| 1 |      | 19.557 | 37831371 | 1051532 | 29.71  |
| 2 |      | 20.338 | 89504210 | 2111206 | 70.29  |

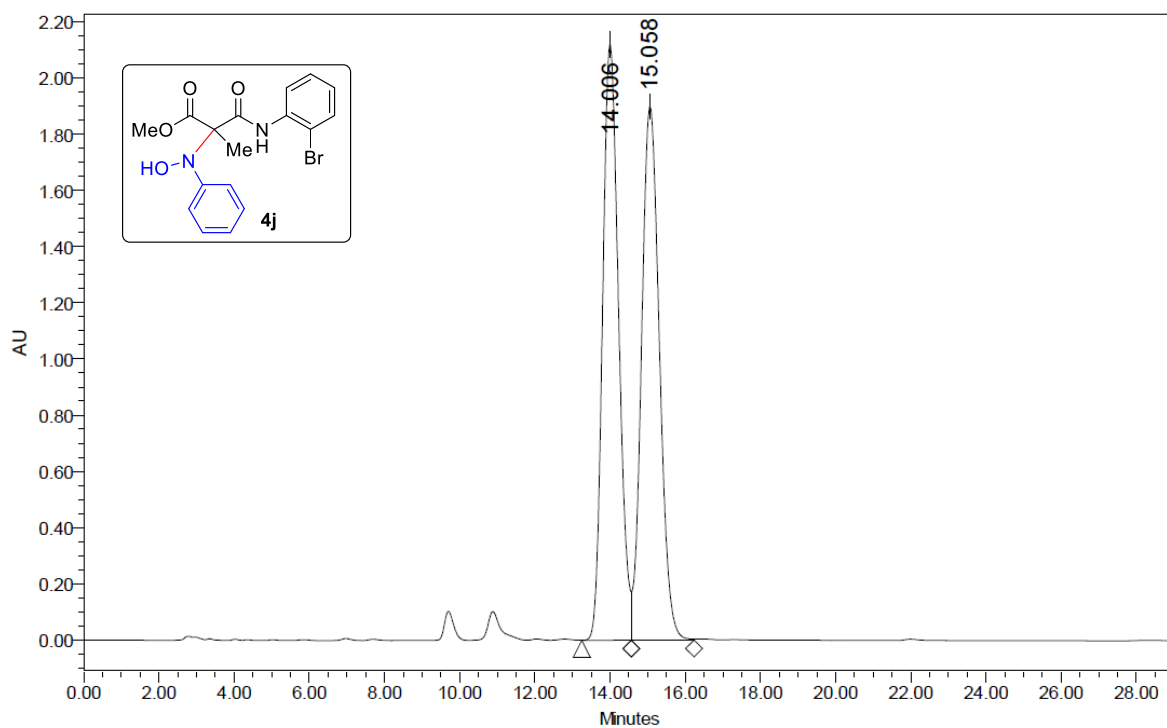

#### Peak Results

|   | Name | RT     | Area     | Height  | % Area |
|---|------|--------|----------|---------|--------|
| 1 |      | 14.006 | 62680567 | 2119760 | 50.00  |
| 2 |      | 15.058 | 62668088 | 1898139 | 50.00  |

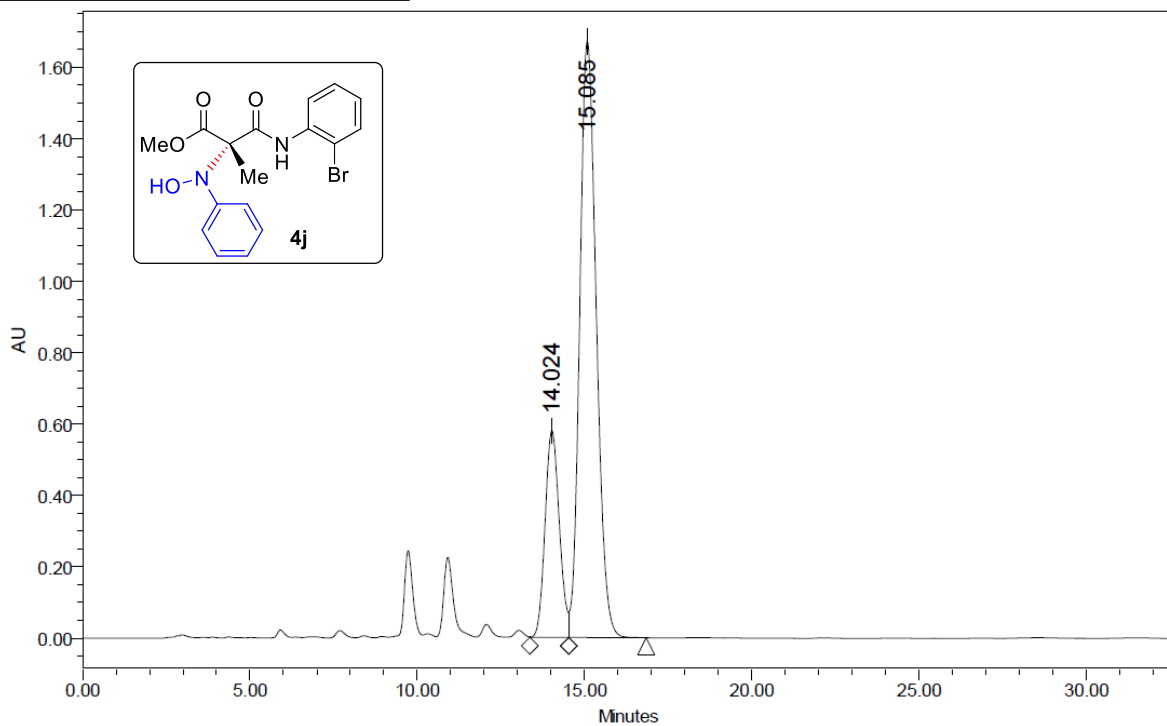

#### Peak Results

|   | Name | RT     | Area     | Height  | % Area |
|---|------|--------|----------|---------|--------|
| 1 |      | 14.024 | 17108258 | 579956  | 22.98  |
| 2 |      | 15.085 | 57354909 | 1670757 | 77.02  |

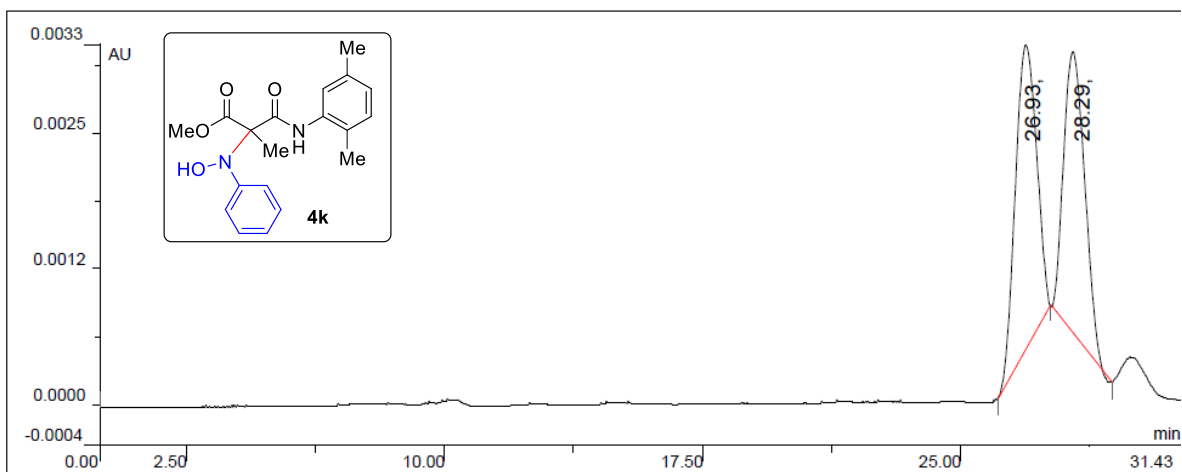

#### Area % Height %

| Sr. No. | Component Name | Ret. Time. | Area $\mu$ volt sec | Height $\mu$ volt | Area %        | Height %      | ID |   |
|---------|----------------|------------|---------------------|-------------------|---------------|---------------|----|---|
| 1       |                | 26.93      | 60463.60            | 1394              | 51.31         | 51.80         | U  | M |
| 2       |                | 28.29      | 57382.23            | 1297              | 48.69         | 48.20         | U  | M |
|         |                |            | <b>117845.83</b>    | <b>2691</b>       | <b>100.00</b> | <b>100.00</b> |    |   |

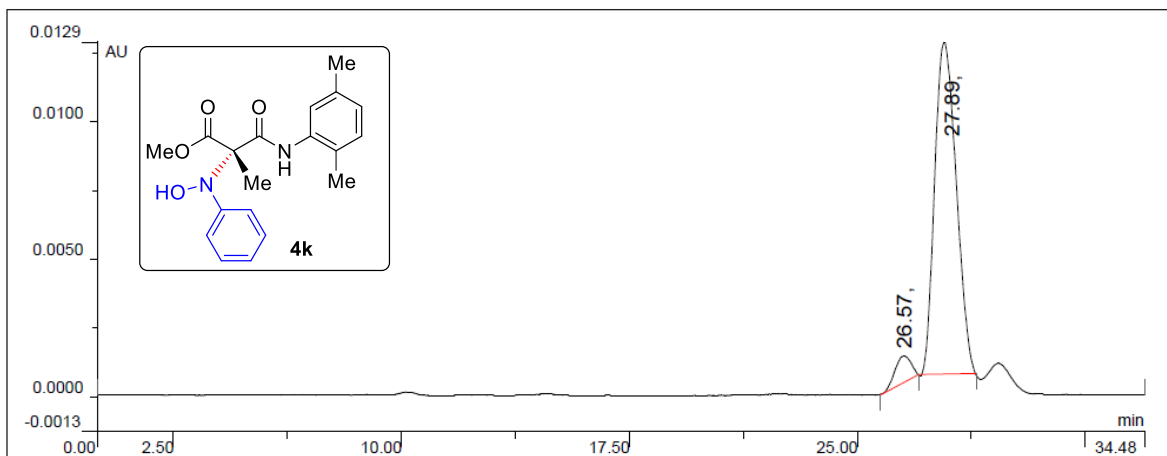

#### Area % Height %

| Sr. No. | Component Name | Ret. Time. | Area $\mu$ volt sec | Height $\mu$ volt | Area %        | Height %      | ID |   |
|---------|----------------|------------|---------------------|-------------------|---------------|---------------|----|---|
| 1       |                | 26.57      | 17428.91            | 474               | 5.45          | 7.27          | U  | M |
| 2       |                | 27.89      | 302651.03           | 6045              | 94.55         | 92.73         | U  | M |
|         |                |            | <b>320079.94</b>    | <b>6520</b>       | <b>100.00</b> | <b>100.00</b> |    |   |

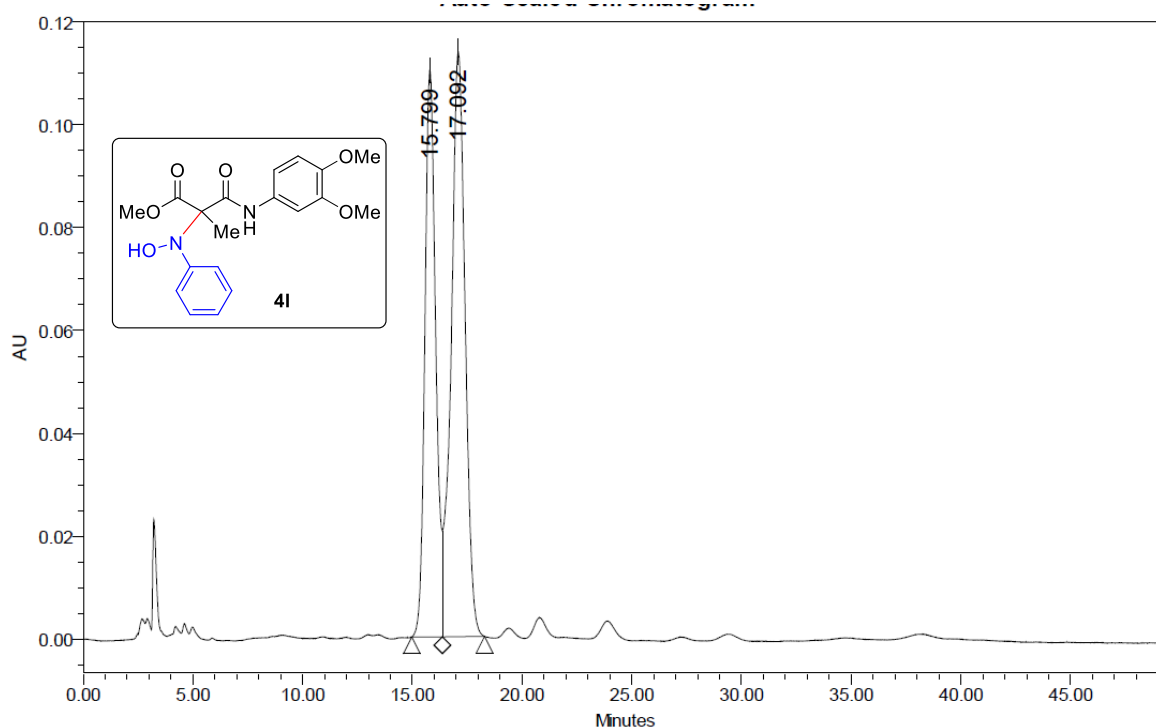

#### Peak Results

|   | Name | RT     | Area    | Height | % Area |
|---|------|--------|---------|--------|--------|
| 1 |      | 15.799 | 3752918 | 110207 | 42.66  |
| 2 |      | 17.092 | 5043732 | 113771 | 57.34  |

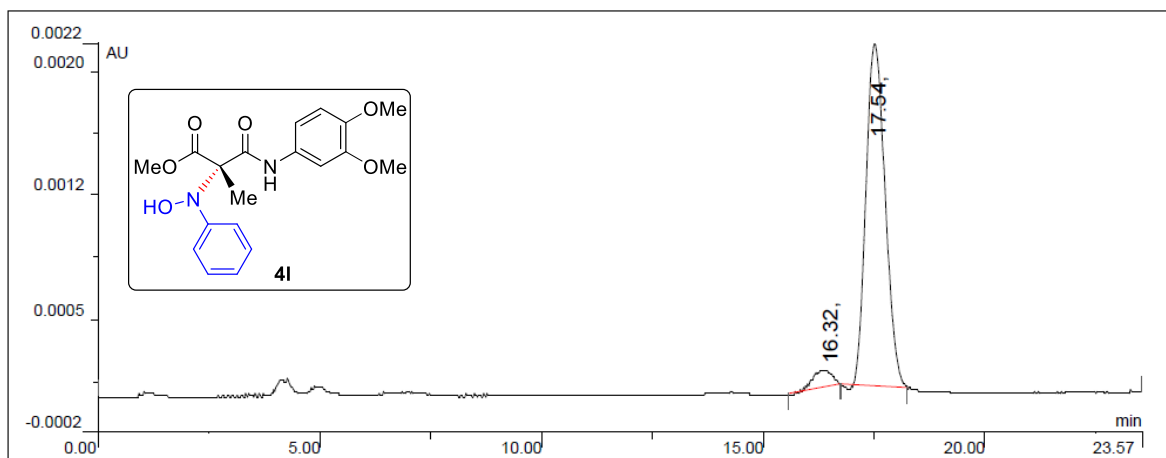

#### Area % Height %

| Sr. No. | Component Name | Ret. Time. | Area $\mu$ volt sec | Height $\mu$ volt | Area % | Height % | ID |   |
|---------|----------------|------------|---------------------|-------------------|--------|----------|----|---|
| 1       |                | 16.32      | 1559.89             | 0                 | 4.71   | 0.00     | U  | M |
| 2       |                | 17.54      | 31578.29            | 1034              | 95.29  | 100.00   | U  | M |
|         |                |            | 33138.17            | 1034              | 100.00 | 100.00   |    |   |



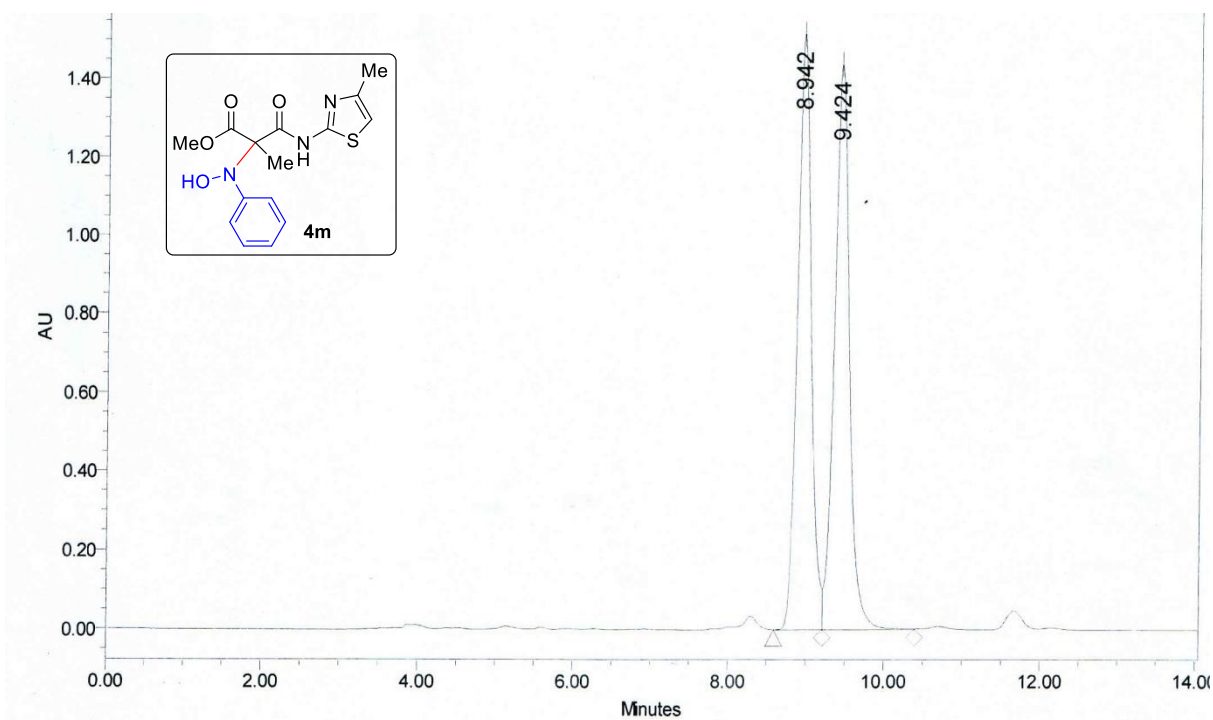

**Peak Results**

| Name | RT    | Area     | Height  | % Area |
|------|-------|----------|---------|--------|
| 1    | 8.942 | 18685037 | 1528419 | 49.08  |
| 2    | 9.424 | 19389232 | 1450639 | 50.92  |

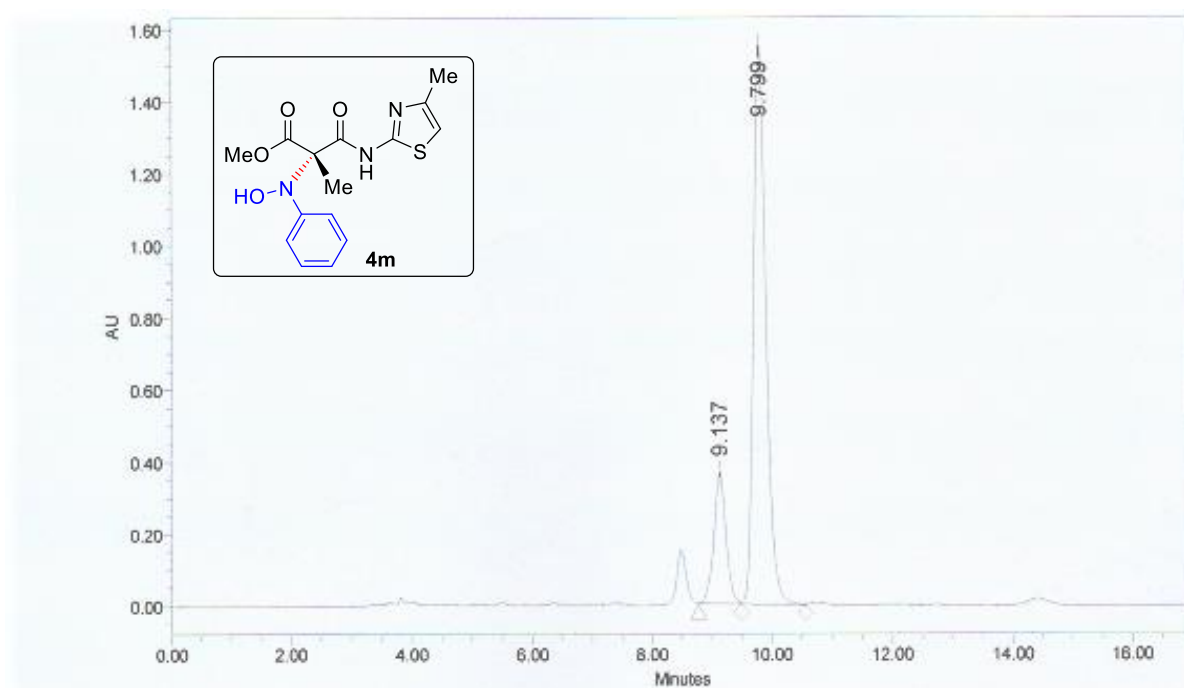

**Peak Results**

| Name | RT    | Area     | Height  | % Area |
|------|-------|----------|---------|--------|
| 1    | 9.137 | 5176118  | 365250  | 18.85  |
| 2    | 9.799 | 22285109 | 1551883 | 81.15  |

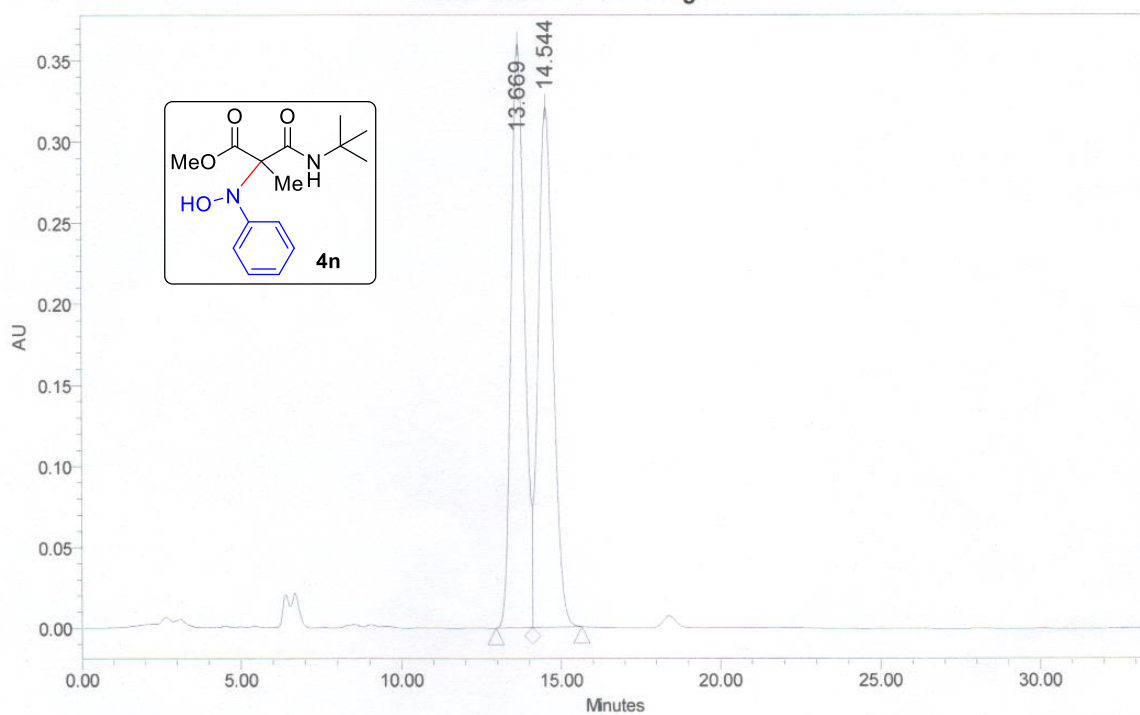

#### Peak Results

| Name | RT     | Area     | Height | % Area |
|------|--------|----------|--------|--------|
| 1    | 13.669 | 10525643 | 360176 | 49.99  |
| 2    | 14.544 | 10529521 | 321051 | 50.01  |

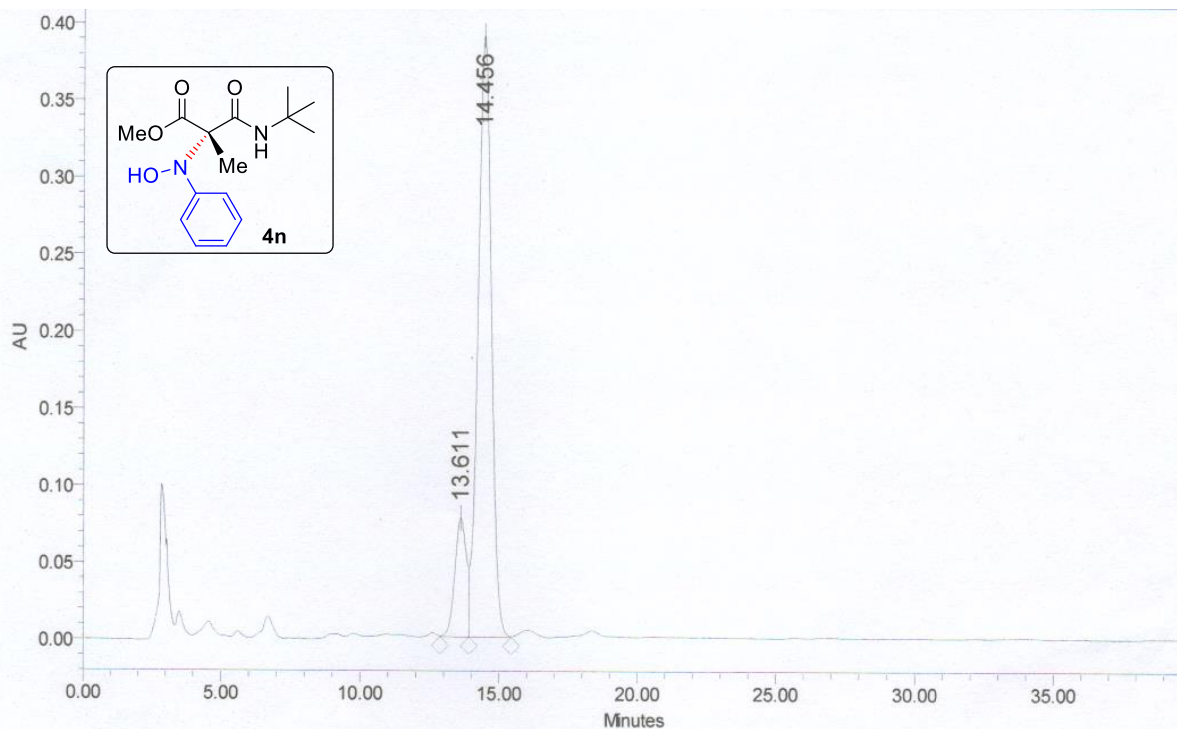

#### Peak Results

| Name | RT     | Area     | Height | % Area |
|------|--------|----------|--------|--------|
| 1    | 13.611 | 2249004  | 77648  | 14.66  |
| 2    | 14.456 | 13092160 | 390351 | 85.34  |

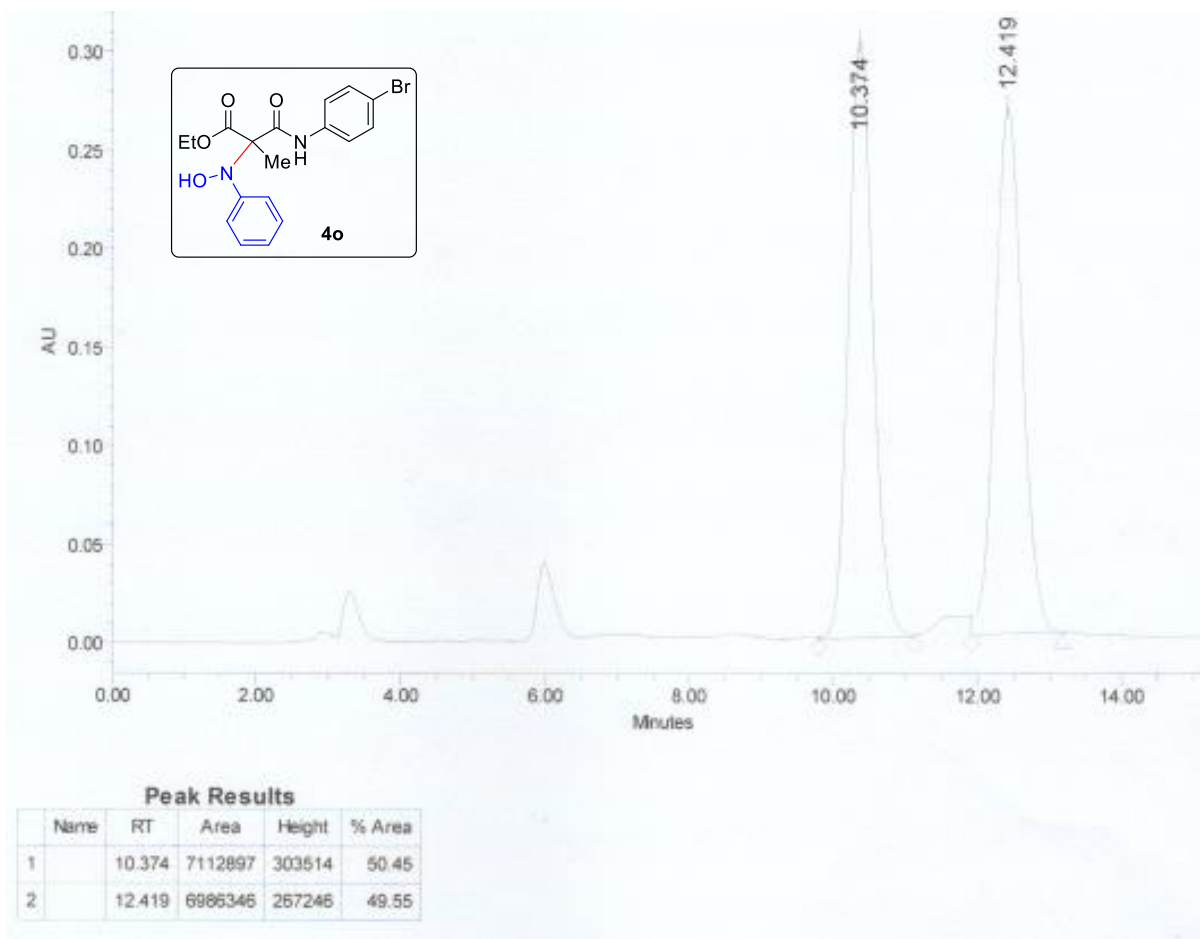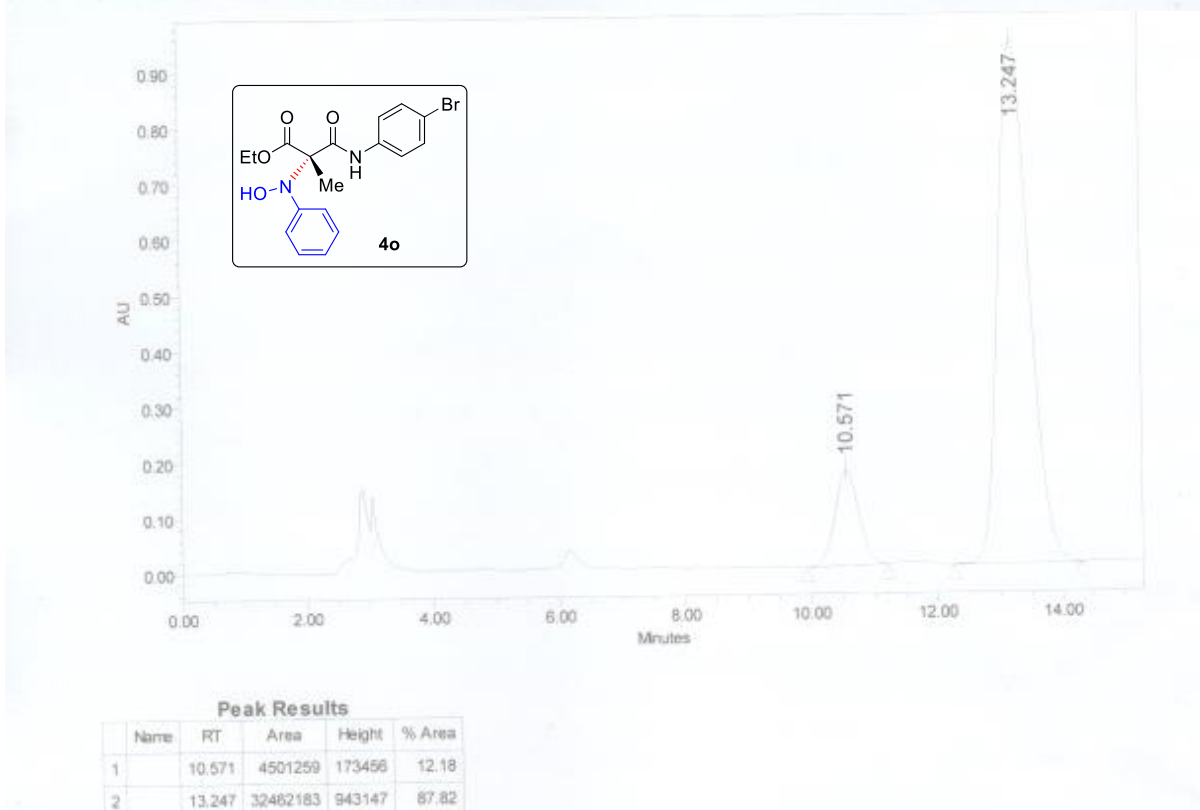

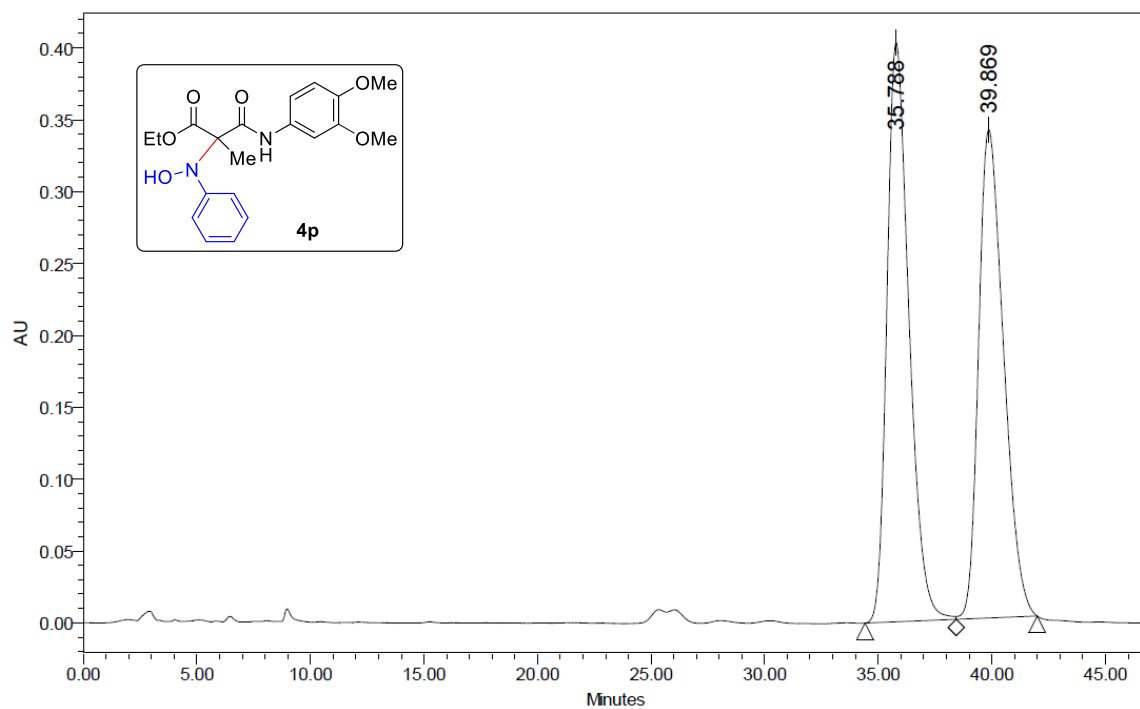

#### Peak Results

| Name | RT     | Area     | Height | % Area |
|------|--------|----------|--------|--------|
| 1    | 35.788 | 27176289 | 403191 | 51.10  |
| 2    | 39.869 | 26007205 | 339869 | 48.90  |

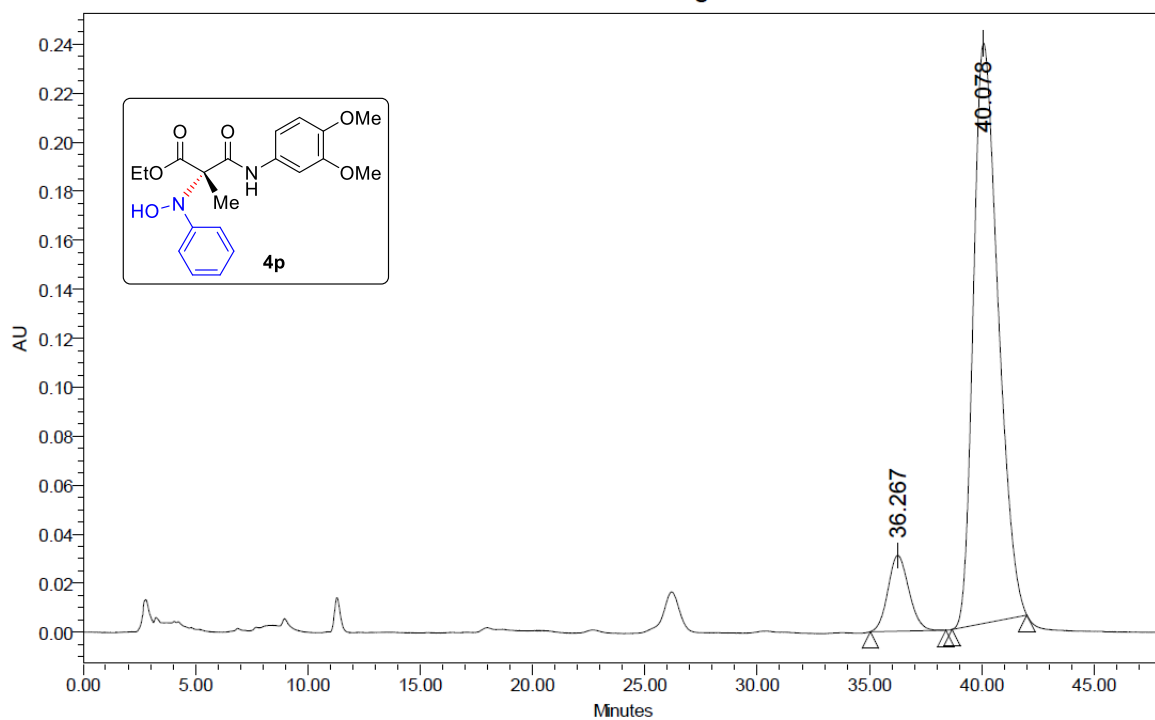

#### Peak Results

| Name | RT     | Area     | Height | % Area |
|------|--------|----------|--------|--------|
| 1    | 36.267 | 2004120  | 30945  | 9.95   |
| 2    | 40.078 | 18135985 | 236805 | 90.05  |

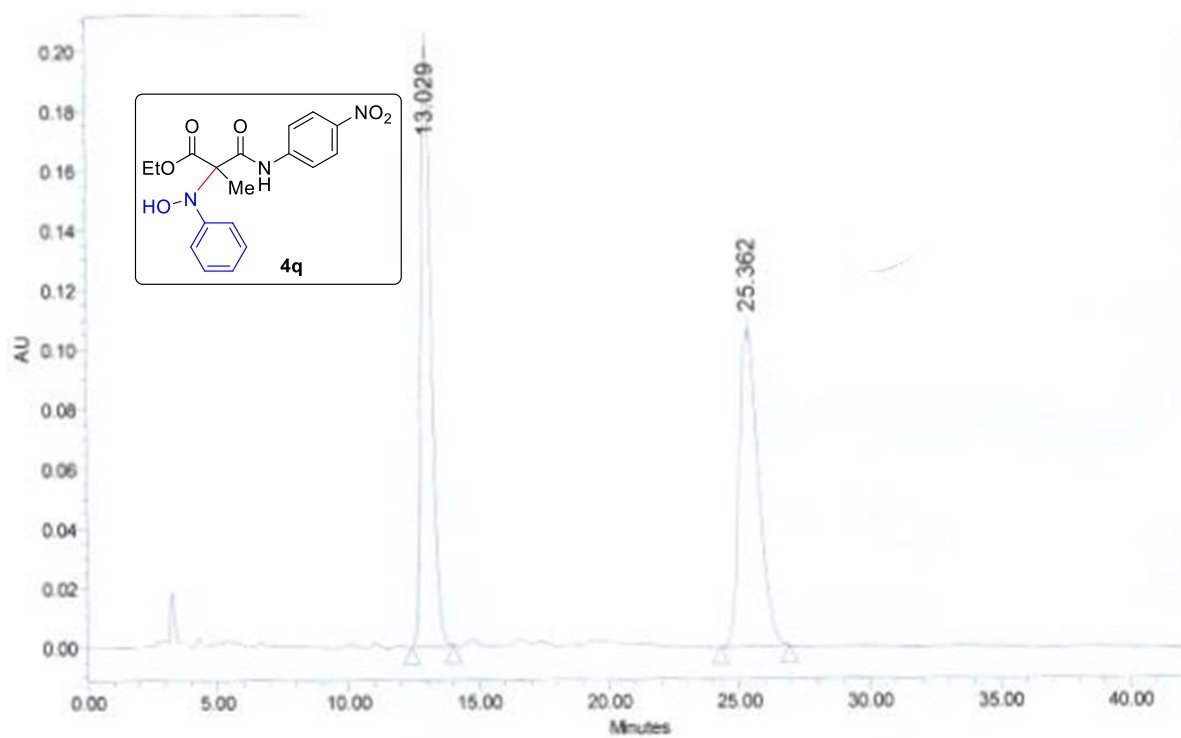

Peak Results

| Name | RT     | Area    | Height | % Area |
|------|--------|---------|--------|--------|
| 1    | 13.029 | 5475531 | 201598 | 50.23  |
| 2    | 25.362 | 5426362 | 106569 | 49.77  |

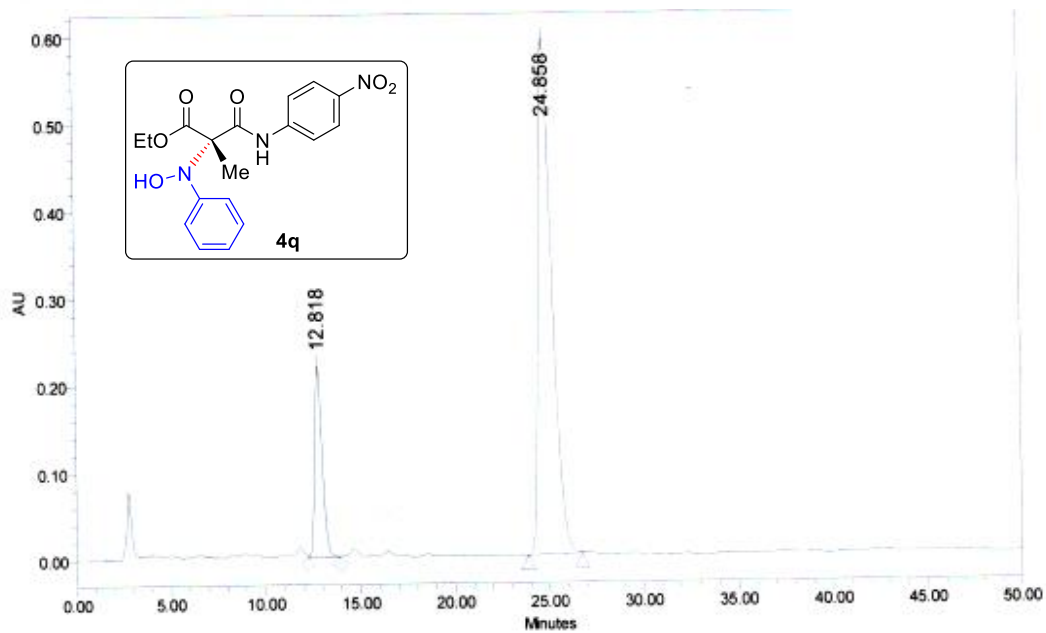

Peak Results

| Name | RT     | Area     | Height | % Area |
|------|--------|----------|--------|--------|
| 1    | 12.818 | 6027961  | 219758 | 16.73  |
| 2    | 24.858 | 30013007 | 592173 | 83.27  |

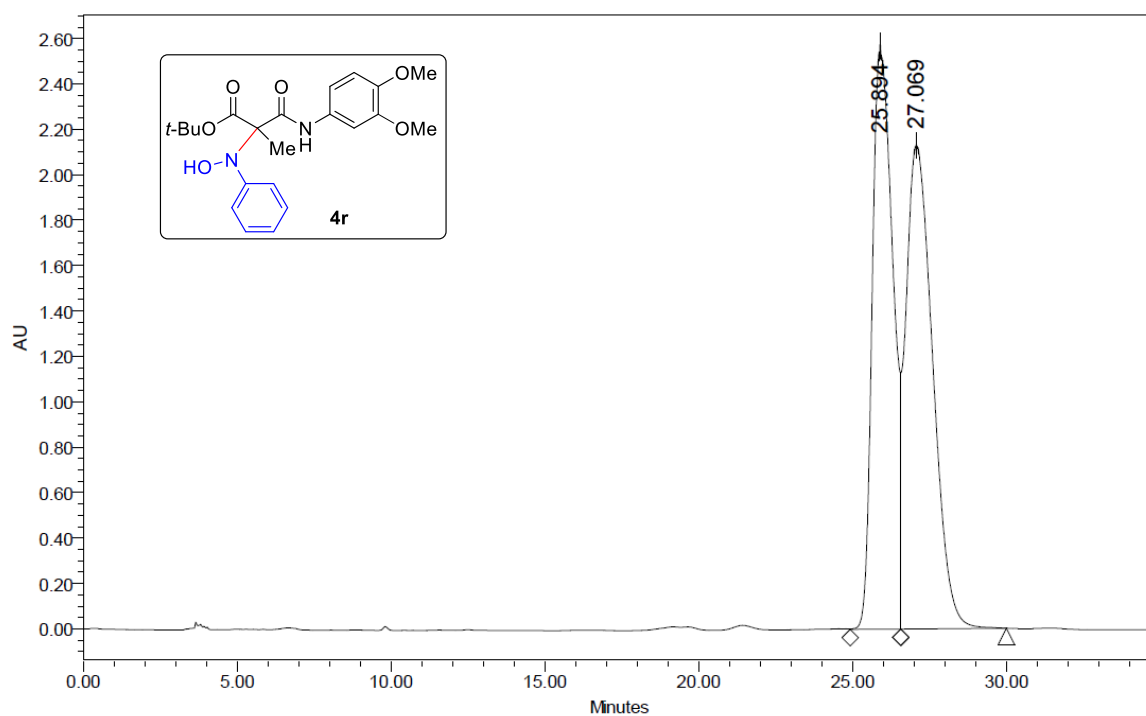

#### Peak Results

|   | Name | RT     | Area      | Height  | % Area |
|---|------|--------|-----------|---------|--------|
| 1 |      | 25.894 | 119737181 | 2573806 | 47.96  |
| 2 |      | 27.069 | 129944044 | 2128938 | 52.04  |

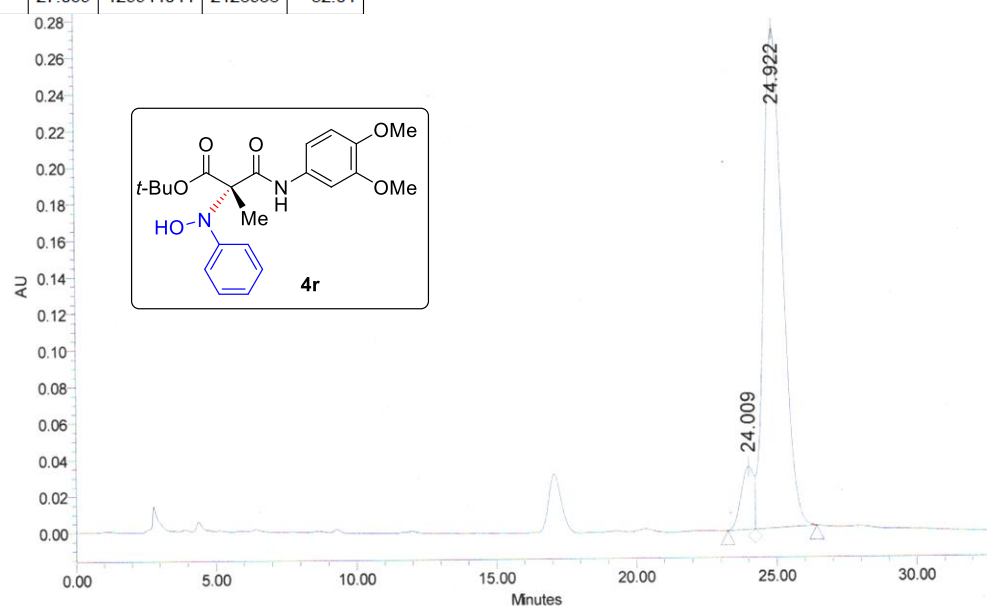

#### Peak Results

|   | Name | RT     | Area     | Height | % Area |
|---|------|--------|----------|--------|--------|
| 1 |      | 24.009 | 1080063  | 34707  | 7.77   |
| 2 |      | 24.922 | 12817488 | 273358 | 92.23  |

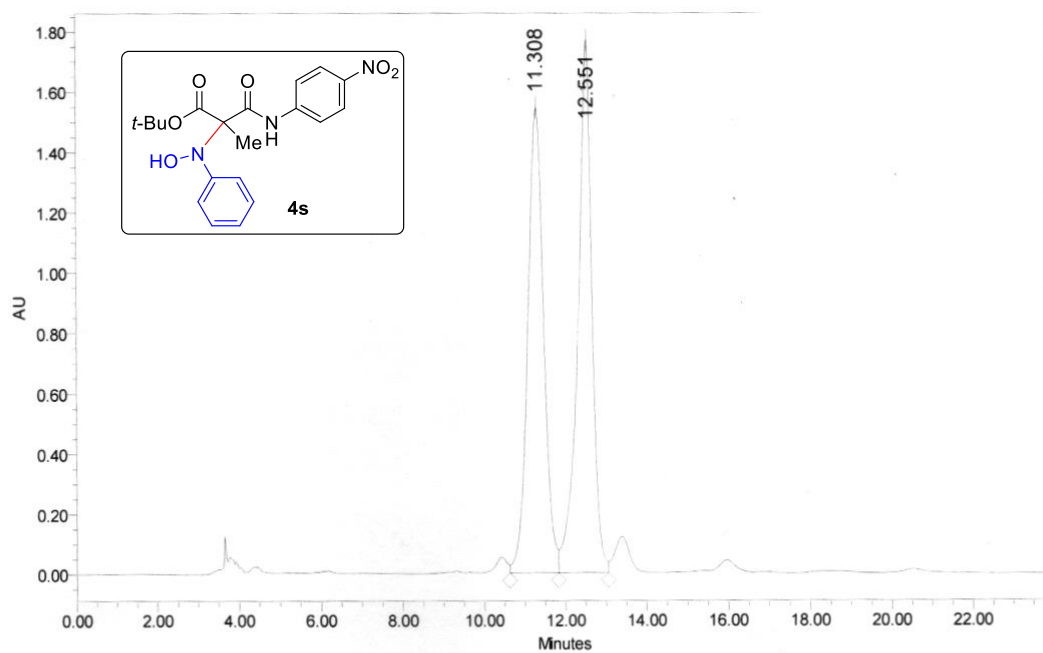

#### Peak Results

| Name | RT     | Area     | Height  | % Area |
|------|--------|----------|---------|--------|
| 1    | 11.308 | 41880293 | 1541295 | 49.57  |
| 2    | 12.551 | 42608916 | 1767799 | 50.43  |

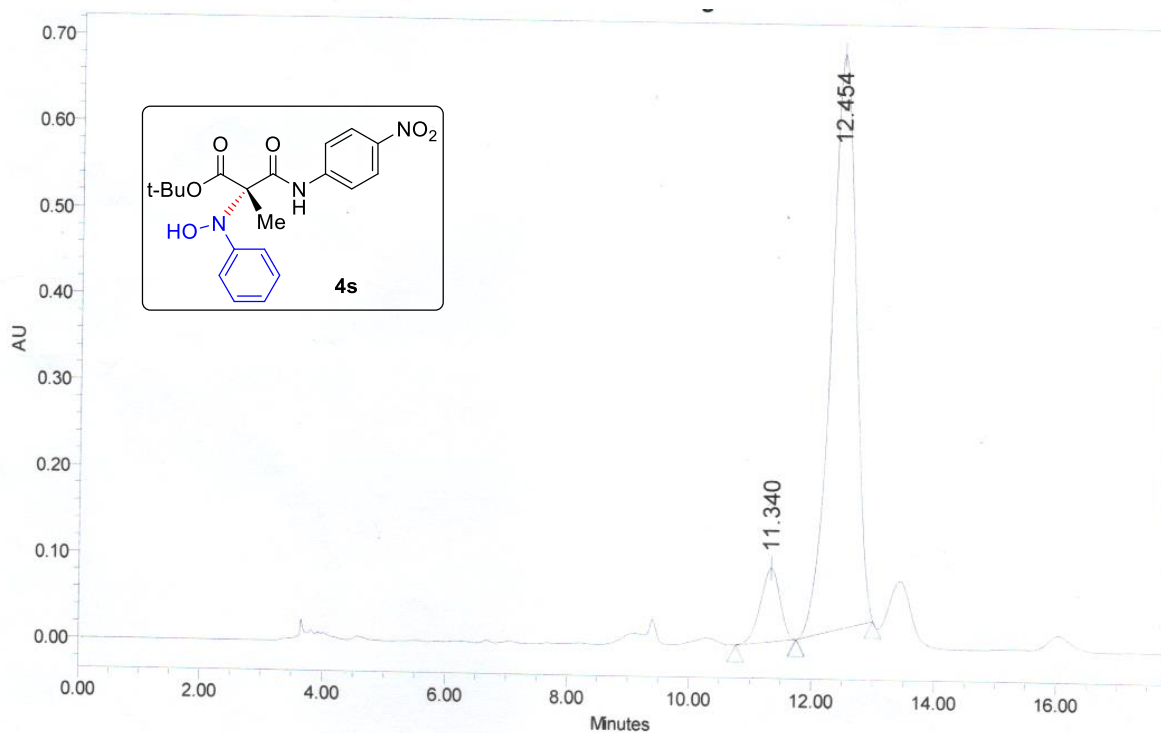

#### Peak Results

| Name | RT     | Area     | Height | % Area |
|------|--------|----------|--------|--------|
| 1    | 11.340 | 1876471  | 85359  | 9.20   |
| 2    | 12.454 | 18519793 | 664953 | 90.80  |



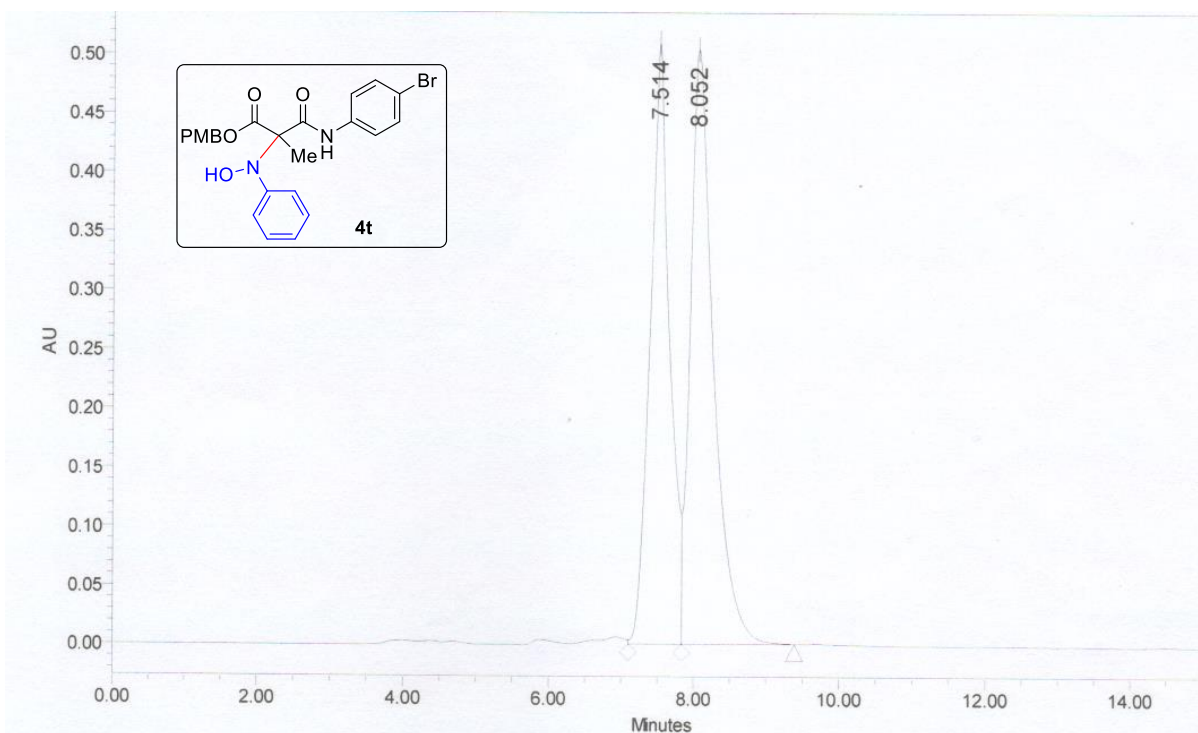

#### Peak Results

| Name | RT    | Area     | Height | % Area |
|------|-------|----------|--------|--------|
| 1    | 7.514 | 9509216  | 509883 | 46.03  |
| 2    | 8.052 | 11147398 | 504245 | 53.97  |

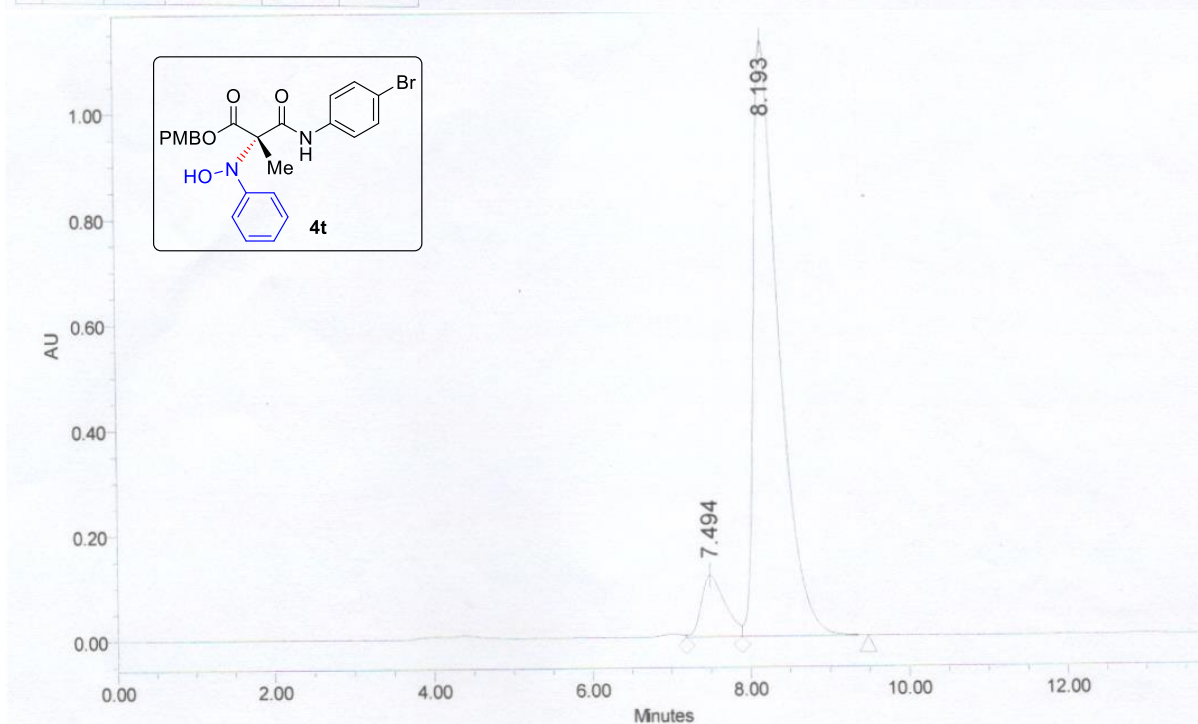

#### Peak Results

| Name | RT    | Area     | Height  | % Area |
|------|-------|----------|---------|--------|
| 1    | 7.494 | 2425287  | 116503  | 8.86   |
| 2    | 8.193 | 24937220 | 1128942 | 91.14  |



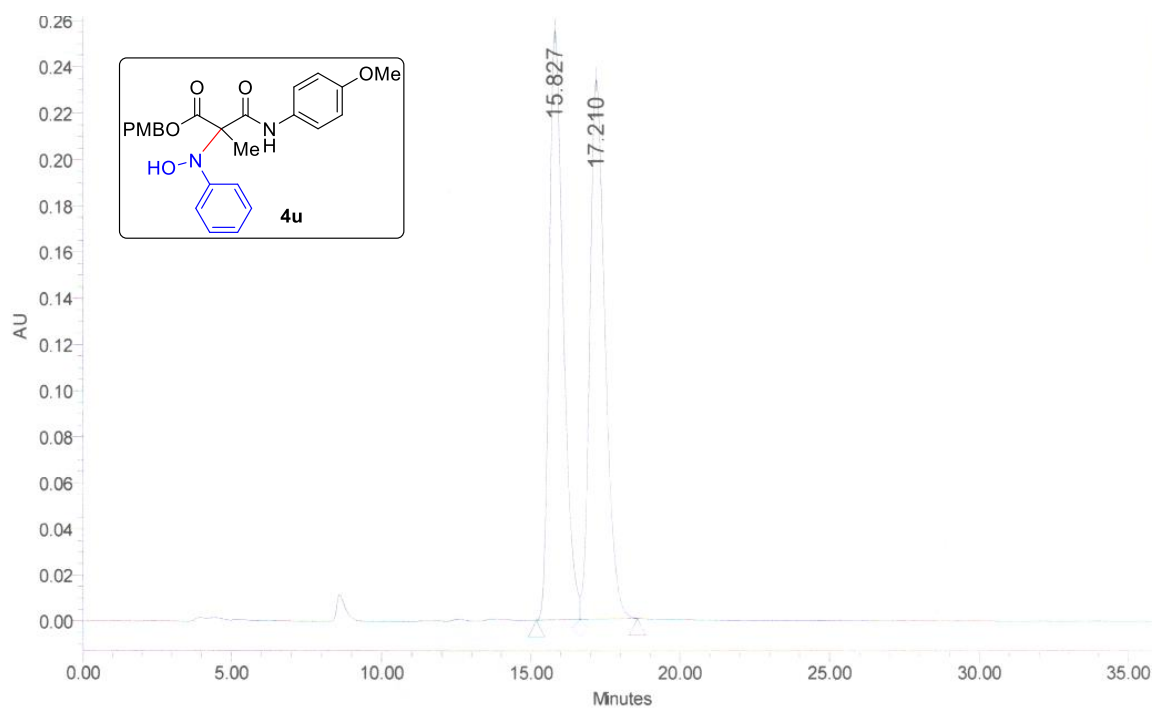

#### Peak Results

| Name | RT     | Area    | Height | % Area |
|------|--------|---------|--------|--------|
| 1    | 15.827 | 8366672 | 255386 | 50.15  |
| 2    | 17.210 | 8317556 | 233791 | 49.85  |

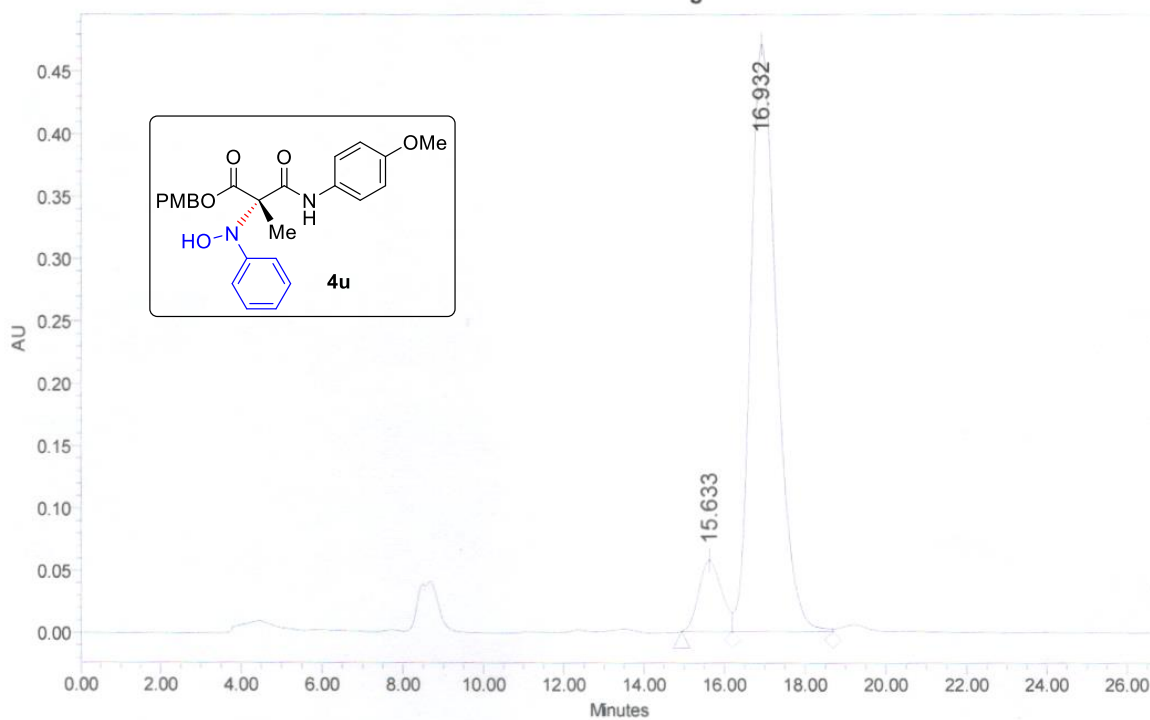

#### Peak Results

| Name | RT     | Area     | Height | % Area |
|------|--------|----------|--------|--------|
| 1    | 15.633 | 2248592  | 56936  | 9.67   |
| 2    | 16.932 | 21013727 | 470780 | 90.33  |

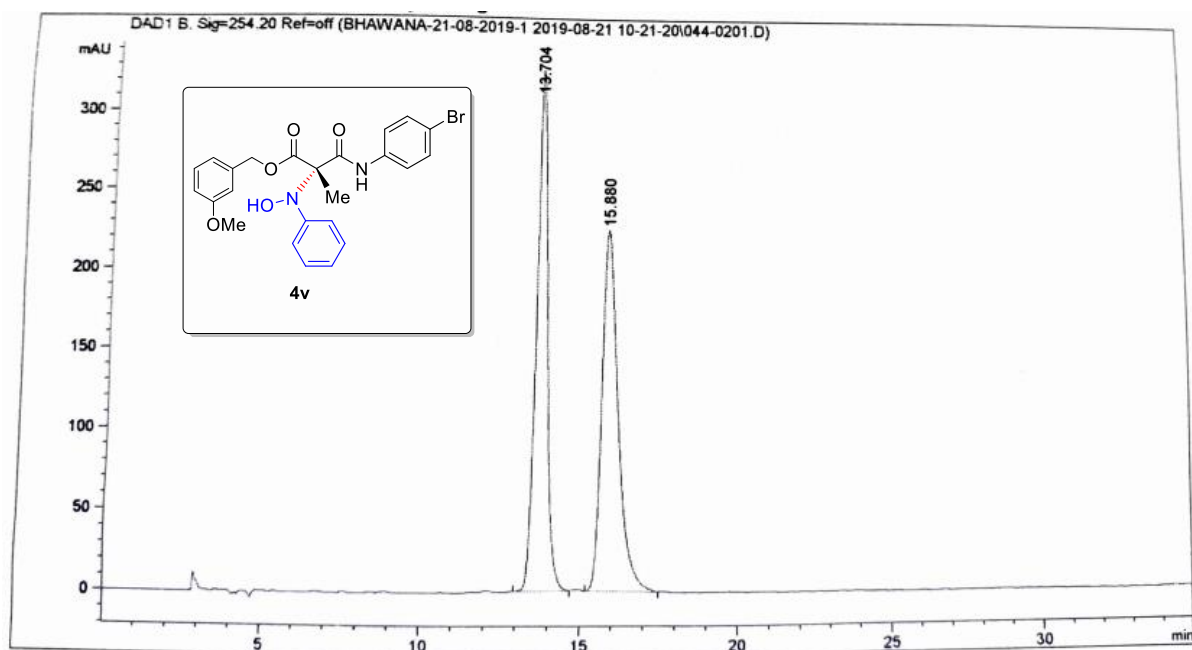

| Peak # | RetTime [min] | Type | Width [min] | Area [mAU*s] | Height [mAU] | Area %  |
|--------|---------------|------|-------------|--------------|--------------|---------|
| 1      | 13.704        | BB   | 0.3678      | 7876.48096   | 326.14255    | 49.9212 |
| 2      | 15.880        | BB   | 0.5310      | 7901.35156   | 223.20715    | 50.0788 |

Totals : 1.57778e4 549.34970

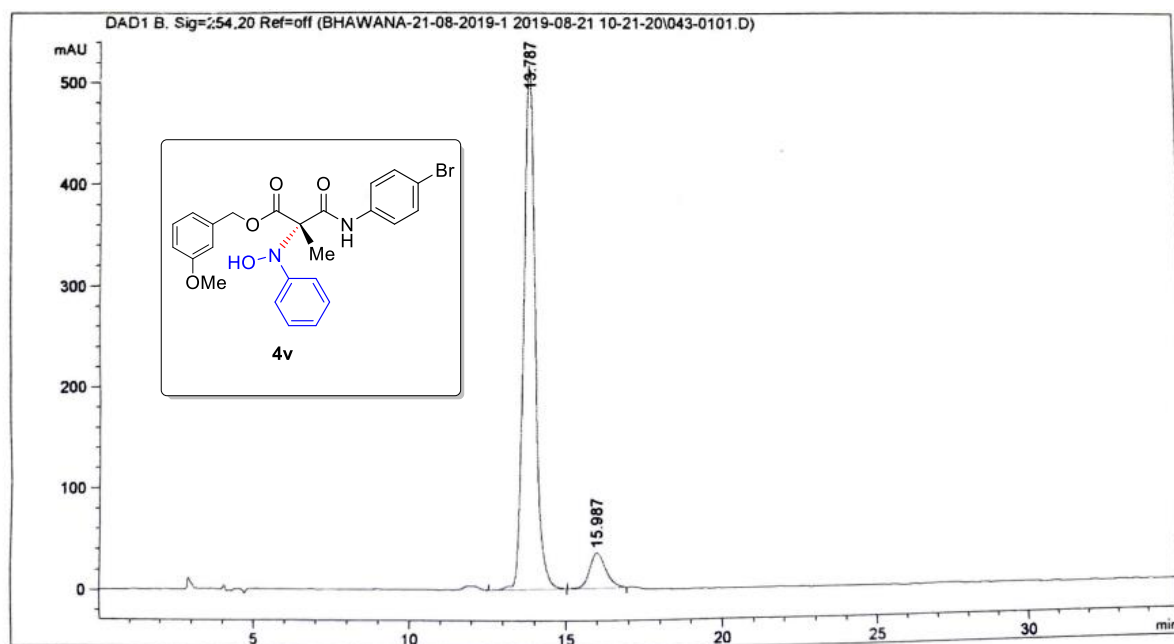

| Peak # | RetTime [min] | Type | Width [min] | Area [mAU*s] | Height [mAU] | Area %  |
|--------|---------------|------|-------------|--------------|--------------|---------|
| 1      | 13.787        | BB   | 0.3780      | 1.27783e4    | 514.14838    | 91.3068 |
| 2      | 15.987        | BB   | 0.5348      | 1216.60291   | 34.38516     | 8.6932  |

Totals : 1.39949e4 548.53354

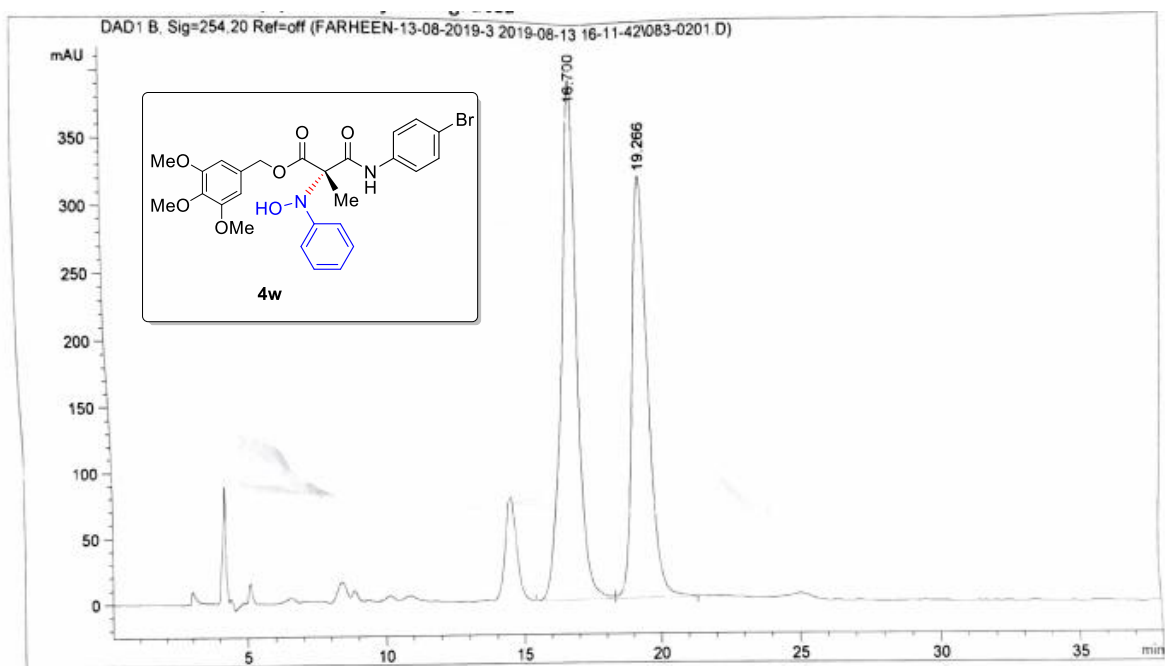

| Peak # | RetTime [min] | Type | Width [min] | Area [mAU*s] | Height [mAU] | Area %  |
|--------|---------------|------|-------------|--------------|--------------|---------|
| 1      | 16.700        | BV   | 0.5911      | 1.56196e4    | 396.91266    | 54.9978 |
| 2      | 19.266        | VB   | 0.6136      | 1.27808e4    | 320.27298    | 45.0022 |

Totals : 2.84004e4 717.18564

#### Additional Info : Peak(s) manually integrated

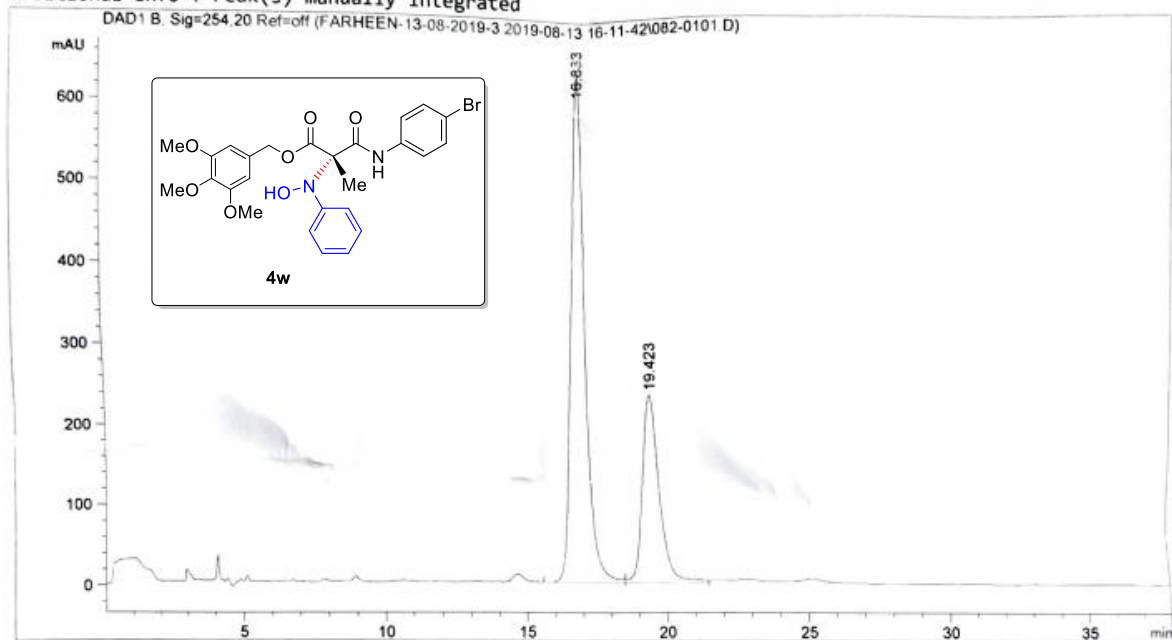

| Peak # | RetTime [min] | Type | Width [min] | Area [mAU*s] | Height [mAU] | Area %  |
|--------|---------------|------|-------------|--------------|--------------|---------|
| 1      | 16.833        | BV   | 0.5301      | 2.21835e4    | 637.23199    | 69.3520 |
| 2      | 19.423        | VV   | 0.6299      | 9803.32813   | 235.38416    | 30.6480 |

Totals : 3.19869e4 872.61615

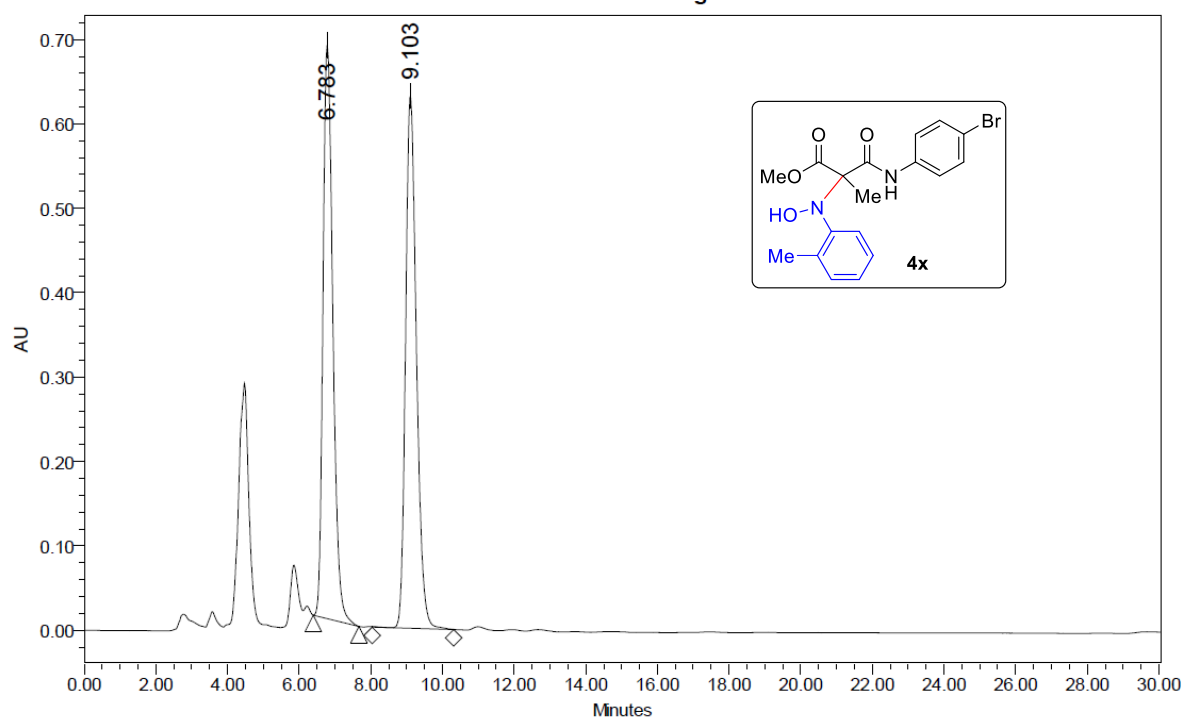

#### Peak Results

|   | Name | RT    | Area     | Height | % Area |
|---|------|-------|----------|--------|--------|
| 1 |      | 6.783 | 12985981 | 679709 | 49.50  |
| 2 |      | 9.103 | 13249321 | 630724 | 50.50  |

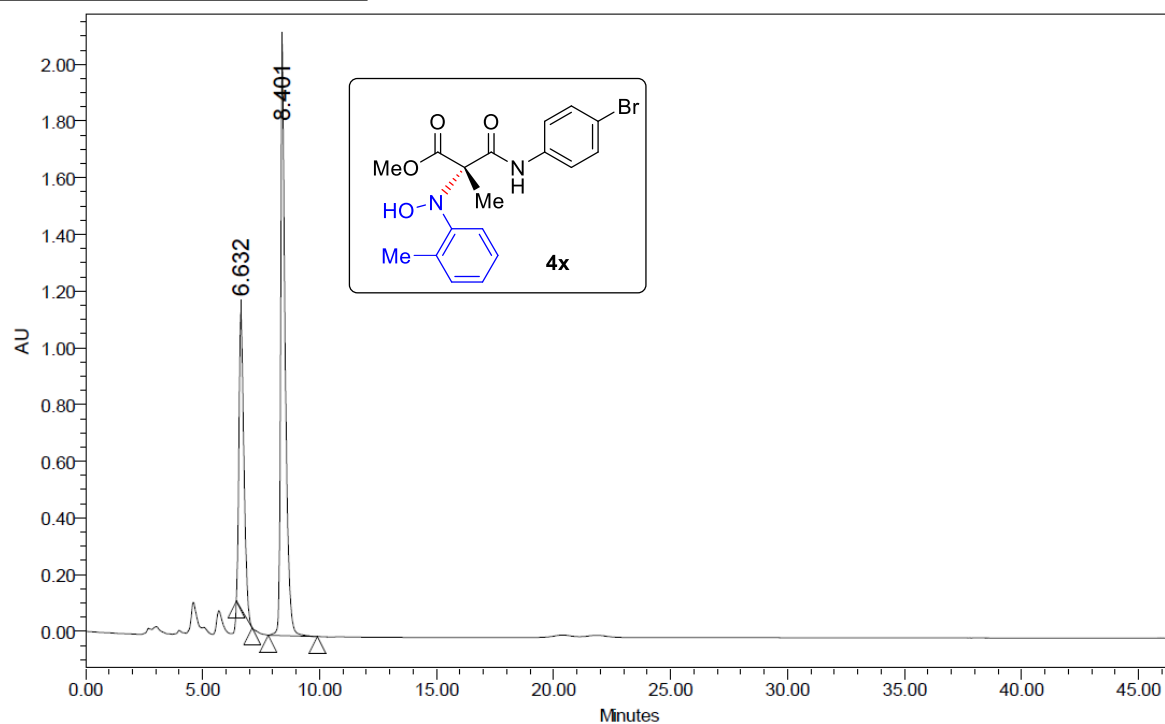

#### Peak Results

|   | Name | RT    | Area     | Height  | % Area |
|---|------|-------|----------|---------|--------|
| 1 |      | 6.632 | 15350541 | 1044740 | 34.84  |
| 2 |      | 8.401 | 28715872 | 2086879 | 65.16  |

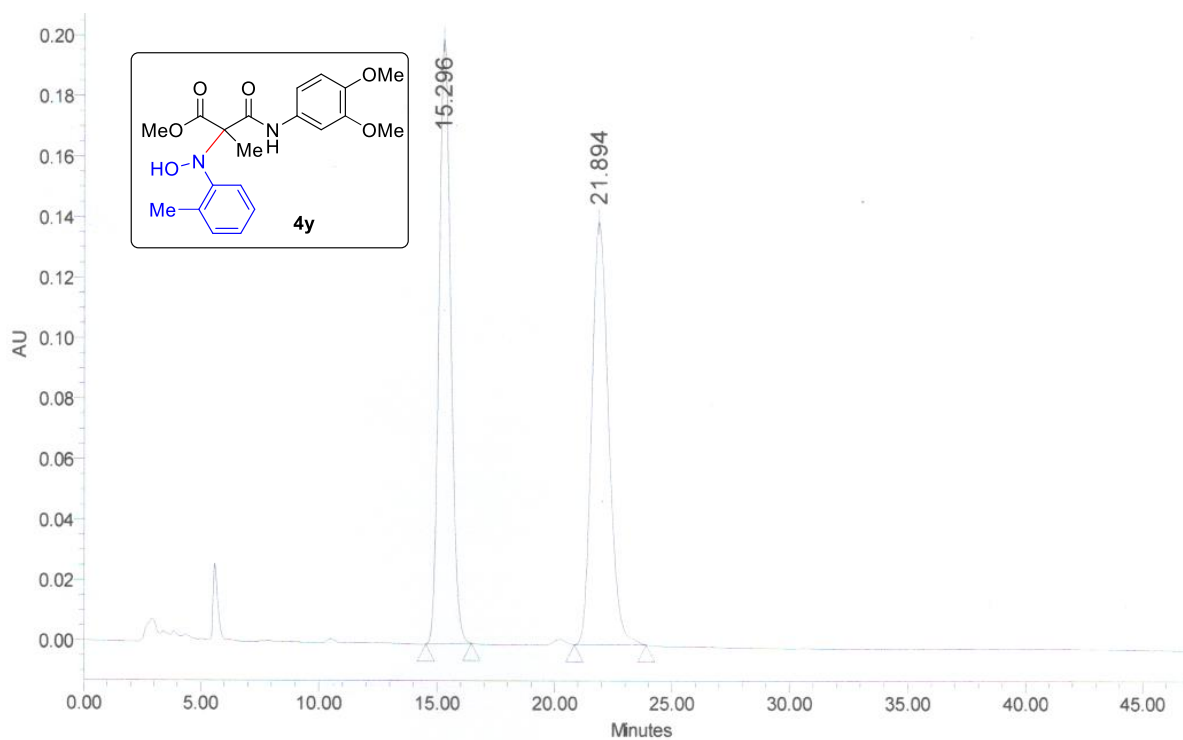

#### Peak Results

| Name | RT     | Area    | Height | % Area |
|------|--------|---------|--------|--------|
| 1    | 15.296 | 6957461 | 199991 | 49.73  |
| 2    | 21.894 | 7033601 | 139914 | 50.27  |

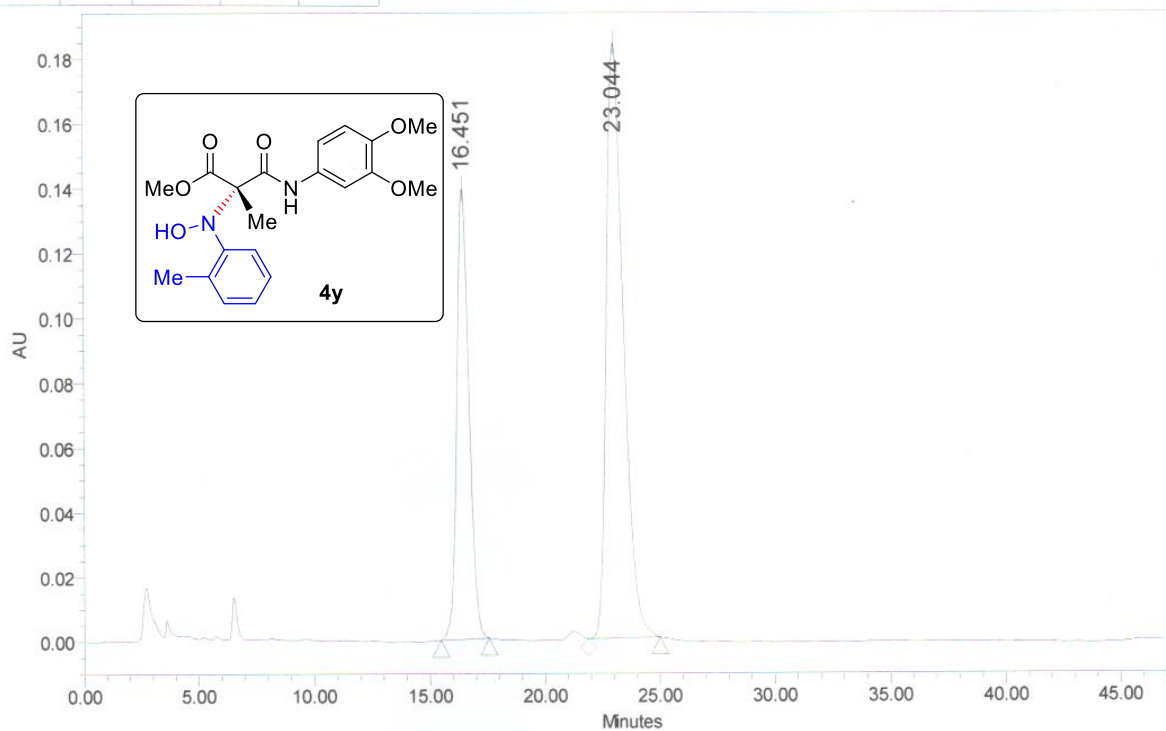

#### Peak Results

| Name | RT     | Area    | Height | % Area |
|------|--------|---------|--------|--------|
| 1    | 16.451 | 5113176 | 139320 | 34.99  |
| 2    | 23.044 | 9499541 | 184048 | 65.01  |

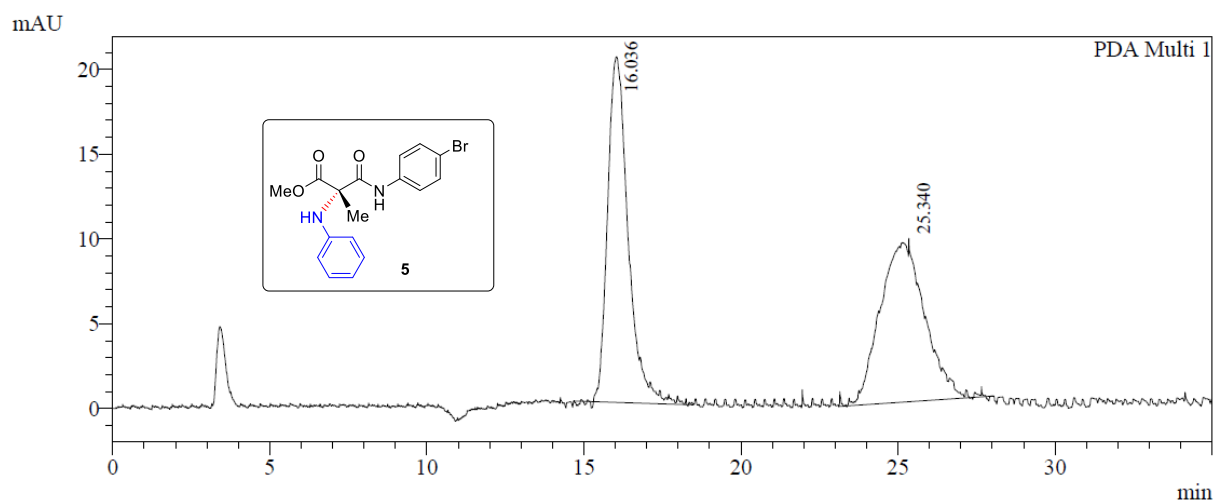

Ch1 251nm 4nm

PeakTable

| Peak# | Ret. Time | Area    | Height | Area %  |
|-------|-----------|---------|--------|---------|
| 1     | 16.036    | 926140  | 20401  | 49.620  |
| 2     | 25.340    | 940332  | 9649   | 50.380  |
| Total |           | 1866472 | 30050  | 100.000 |

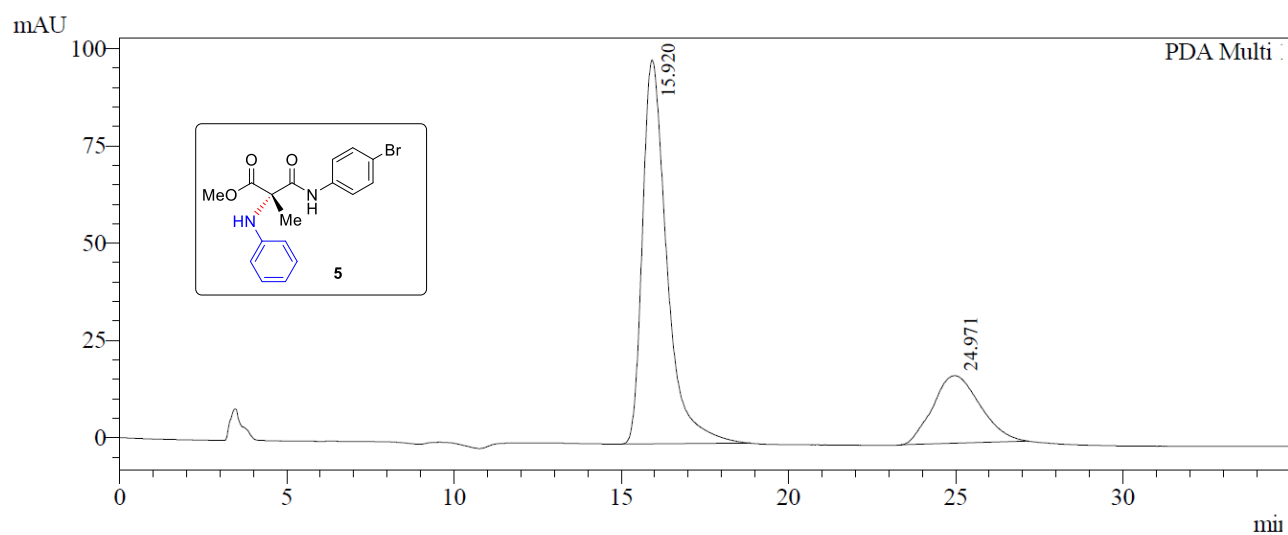

Ch1 250nm 4nm

PeakTable

| Peak# | Ret. Time | Area    | Height | Area %  |
|-------|-----------|---------|--------|---------|
| 1     | 15.920    | 4998736 | 98606  | 74.547  |
| 2     | 24.971    | 1706783 | 17375  | 25.453  |
| Total |           | 6705519 | 115981 | 100.000 |
